# Supplementary material
Source: publisher site journal article supplement (https://www.spandidos-publications.com/578/downloadSupplementary)
Supplement: Supplementary file 1 [file downloadSupplementary]

## Sheet: Sheet1
Table SI. LC-MS information of the identified exosomal proteins.
Protein IDs	Majority protein IDs	Peptide counts (all)	Peptide counts (razor+unique)	Peptide counts (unique)	Protein names	Gene names	FASTA headers	Number of proteins	Peptides	Razor + unique peptides	Unique peptides	Peptides OE-01	Peptides OE-02	Peptides OE-03	Peptides ONC-01	Peptides ONC-02	Peptides ONC-03	Razor + unique peptides OE-01	Razor + unique peptides OE-02	Razor + unique peptides OE-03	Razor + unique peptides ONC-01	Razor + unique peptides ONC-02	Razor + unique peptides ONC-03	Unique peptides OE-01	Unique peptides OE-02	Unique peptides OE-03	Unique peptides ONC-01	Unique peptides ONC-02	Unique peptides ONC-03	Sequence coverage (%)	Unique + razor sequence coverage (%)	Unique sequence coverage (%)	Mol. weight [kDa]	Sequence length	Sequence lengths	Q-value	Score	Sequence coverage OE-01 (%)	Sequence coverage OE-02 (%)	Sequence coverage OE-03 (%)	Sequence coverage ONC-01 (%)	Sequence coverage ONC-02 (%)	Sequence coverage ONC-03 (%)	Intensity	Intensity OE-01	Intensity OE-02	Intensity OE-03	Intensity ONC-01	Intensity ONC-02
A5D8V6	A5D8V6	1	1	1	Vacuolar protein sorting-associated protein 37C	VPS37C		1	1	1	1	0	1	0	0	0	0	0	1	0	0	0	0	0	1	0	0	0	0	3.4	3.4	3.4	38.658	355	355	0.001002	2.1008	0	3.4	0	0	0	0	2016100	0	2016100	0	0	0
A6NHQ2	A6NHQ2	1	1	1	rRNA/tRNA 2-O-methyltransferase fibrillarin-like protein 1	FBLL1		1	1	1	1	1	0	0	0	1	1	1	0	0	0	1	1	1	0	0	0	1	1	3.3	3.3	3.3	34.803	334	334	0.0092421	1.5956	3.3	0	0	0	3.3	3.3	8495600	3554800	0	0	0	2185200
K7EJ46	K7EJ46	1	1	1	Small integral membrane protein 22	SMIM22		1	1	1	1	0	0	1	0	1	0	0	0	1	0	1	0	0	0	1	0	1	0	12.6	12.6	12.6	14.57	135	135	0	8.1463	0	0	12.6	0	12.6	0	3360400	0	0	2466600	0	893720
O00148;Q13838	O00148	4;4	4;4	4;4	ATP-dependent RNA helicase DDX39A;Spliceosome RNA helicase DDX39B	DDX39A;DDX39B	;	2	4	4	4	2	3	2	0	1	0	2	3	2	0	1	0	2	3	2	0	1	0	14.8	14.8	14.8	49.129	427	427;428	0	6.2416	10.8	11.5	5.6	0	7.5	0	17846000	6084400	6108600	3935600	0	1717300
O00159	O00159	23	23	23	Unconventional myosin-Ic	MYO1C		1	23	23	23	18	17	17	19	14	17	18	17	17	19	14	17	18	17	17	19	14	17	28	28	28	121.68	1063	1063	0	107.07	22.5	22.6	21.6	24.2	18.7	20.5	692350000	124770000	112880000	110130000	134000000	84698000
O00161	O00161	3	3	3	Synaptosomal-associated protein 23	SNAP23		1	3	3	3	2	1	0	2	2	1	2	1	0	2	2	1	2	1	0	2	2	1	25.1	25.1	25.1	23.354	211	211	0	17.964	13.3	6.6	0	18.5	18.5	6.6	34442000	14694000	5454700	0	5445700	5591500
O00186	O00186	2	2	2	Syntaxin-binding protein 3	STXBP3		1	2	2	2	1	2	1	1	1	2	1	2	1	1	1	2	1	2	1	1	1	2	4.2	4.2	4.2	67.764	592	592	0	2.9764	1.7	4.2	1.7	1.7	1.7	4.2	9861300	1583700	2904000	1291600	1532600	0
O00192	O00192	8	8	8	Armadillo repeat protein deleted in velo-cardio-facial syndrome	ARVCF		1	8	8	8	5	5	4	3	4	1	5	5	4	3	4	1	5	5	4	3	4	1	13	13	13	104.64	962	962	0	14.101	8.8	7.6	7.3	3.5	7.3	1.2	37211000	9965700	9348900	6485500	4252600	5652400
O00231	O00231	5	5	5	26S proteasome non-ATPase regulatory subunit 11	PSMD11		1	5	5	5	1	1	3	3	4	3	1	1	3	3	4	3	1	1	3	3	4	3	15.2	15.2	15.2	47.463	422	422	0	9.6032	2.8	2.8	8.5	8.5	12.1	9.2	33478000	3852800	3542800	6172500	7362300	6784800
O00232	O00232	2	2	2	26S proteasome non-ATPase regulatory subunit 12	PSMD12		1	2	2	2	2	2	1	0	1	0	2	2	1	0	1	0	2	2	1	0	1	0	5	5	5	52.904	456	456	0	3.2013	5	5	2.4	0	2.4	0	11484000	4747400	3216100	2217500	0	1303100
O00299	O00299	12	12	12	Chloride intracellular channel protein 1	CLIC1		1	12	12	12	8	10	10	6	4	8	8	10	10	6	4	8	8	10	10	6	4	8	56.4	56.4	56.4	26.922	241	241	0	88.033	47.7	48.1	49.4	35.7	24.9	41.1	664270000	140560000	148140000	148370000	99448000	38117000
O00303	O00303	2	2	2	Eukaryotic translation initiation factor 3 subunit F	EIF3F		1	2	2	2	0	1	1	1	1	2	0	1	1	1	1	2	0	1	1	1	1	2	9	9	9	37.563	357	357	0	2.9003	0	4.2	4.2	4.8	4.2	9	6951100	0	1040900	856070	1372200	632480
O00391	O00391	7	7	7	Sulfhydryl oxidase 1	QSOX1		1	7	7	7	6	4	4	2	1	1	6	4	4	2	1	1	6	4	4	2	1	1	14.9	14.9	14.9	82.577	747	747	0	26.134	13.1	9	8	4.3	1.7	1.7	64784000	23567000	11610000	18414000	6631100	0
O00425	O00425	8	8	7	Insulin-like growth factor 2 mRNA-binding protein 3	IGF2BP3		1	8	8	7	4	6	4	5	5	3	4	6	4	5	5	3	4	5	3	4	4	2	19.3	19.3	17.1	63.704	579	579	0	15.953	9.7	14.9	10.4	13.1	12.1	7.4	51333000	9269700	15520000	9343400	6984500	7102600
O00461	O00461	1	1	1	Golgi integral membrane protein 4	GOLIM4		1	1	1	1	1	0	1	0	0	0	1	0	1	0	0	0	1	0	1	0	0	0	1.9	1.9	1.9	81.879	696	696	0.0066667	1.7849	1.9	0	1.9	0	0	0	4045800	2558700	0	1487100	0	0
O00468	O00468	63	63	63	Agrin;Agrin N-terminal 110 kDa subunit;Agrin C-terminal 110 kDa subunit;Agrin C-terminal 90 kDa fragment;Agrin C-terminal 22 kDa fragment	AGRN		1	63	63	63	56	54	56	53	53	55	56	54	56	53	53	55	56	54	56	53	53	55	41.9	41.9	41.9	217.23	2067	2067	0	323.31	37.5	34.4	35.7	37.2	35.1	35.5	6681200000	1229800000	1016900000	947290000	1168000000	1165300000
O00487	O00487	1	1	1	26S proteasome non-ATPase regulatory subunit 14	PSMD14		1	1	1	1	1	1	0	1	1	1	1	1	0	1	1	1	1	1	0	1	1	1	4.2	4.2	4.2	34.577	310	310	0	5.3221	4.2	4.2	0	4.2	4.2	4.2	14427000	3109500	3440700	0	2204400	2654800
O00560	O00560	18	18	18	Syntenin-1	SDCBP		1	18	18	18	15	15	14	15	17	15	15	15	14	15	17	15	15	15	14	15	17	15	71.8	71.8	71.8	32.444	298	298	0	323.31	61.4	67.8	67.8	62.8	70.5	67.8	4918800000	859760000	742300000	629730000	915520000	872330000
O00567	O00567	11	11	11	Nucleolar protein 56	NOP56		1	11	11	11	8	7	3	3	1	3	8	7	3	3	1	3	8	7	3	3	1	3	21.7	21.7	21.7	66.049	594	594	0	24.904	15.2	14.3	5.9	6.2	2.2	6.2	85675000	28299000	36045000	10807000	3943400	2314400
O00571;O15523	O00571	5;4	4;3	4;3	ATP-dependent RNA helicase DDX3X;ATP-dependent RNA helicase DDX3Y	DDX3X;DDX3Y	;	2	5	4	4	1	2	2	2	1	3	0	1	1	1	0	2	0	1	1	1	0	2	10	8.3	8.3	73.243	662	662;660	0	4.5604	1.7	3.2	4.2	4.2	1.7	5.9	6239300	0	0	828050	1252800	0
O00764	O00764	1	1	1	Pyridoxal kinase	PDXK		1	1	1	1	1	1	1	0	0	0	1	1	1	0	0	0	1	1	1	0	0	0	5.4	5.4	5.4	35.102	312	312	0	15.559	5.4	5.4	5.4	0	0	0	6338000	2187900	2010600	2139500	0	0
O14579	O14579	1	1	1	Coatomer subunit epsilon	COPE		1	1	1	1	1	1	0	0	0	0	1	1	0	0	0	0	1	1	0	0	0	0	5.5	5.5	5.5	34.482	308	308	0.0019361	1.8976	5.5	5.5	0	0	0	0	4046300	1947300	2099000	0	0	0
O14617	O14617	1	1	1	AP-3 complex subunit delta-1	AP3D1		1	1	1	1	1	0	0	0	0	0	1	0	0	0	0	0	1	0	0	0	0	0	1.9	1.9	1.9	130.16	1153	1153	0	2.9787	1.9	0	0	0	0	0	2738100	2738100	0	0	0	0
O14657	O14657	3	3	3	Torsin-1B	TOR1B		1	3	3	3	1	0	1	2	1	2	1	0	1	2	1	2	1	0	1	2	1	2	11.3	11.3	11.3	37.978	336	336	0	5.5626	4.2	0	4.2	7.1	4.2	7.1	7904000	1236400	0	0	2880200	1398200
O14672	O14672	17	17	17	Disintegrin and metalloproteinase domain-containing protein 10	ADAM10		1	17	17	17	13	11	11	10	14	13	13	11	11	10	14	13	13	11	11	10	14	13	33	33	33	84.141	748	748	0	81.058	25	21.9	20.5	18.9	28.5	24.5	768660000	147850000	123260000	93073000	123310000	137570000
O14745	O14745	7	7	7	Na(+)/H(+) exchange regulatory cofactor NHE-RF1	SLC9A3R1		1	7	7	7	4	3	4	3	5	3	4	3	4	3	5	3	4	3	4	3	5	3	29.1	29.1	29.1	38.868	358	358	0	35.206	15.1	11.7	15.1	10.6	21.8	10.6	171040000	34844000	27973000	30523000	21931000	34815000
O14792	O14792	2	2	2	Heparan sulfate glucosamine 3-O-sulfotransferase 1	HS3ST1		1	2	2	2	0	0	1	1	1	1	0	0	1	1	1	1	0	0	1	1	1	1	5.2	5.2	5.2	35.773	307	307	0.00099602	2.0404	0	0	2.3	2.9	2.9	2.9	4118000	0	0	650490	1210700	1127200
O14818;Q8TAA3	O14818	10;5	10;5	10;5	Proteasome subunit alpha type-7;Proteasome subunit alpha type-7-like	PSMA7;PSMA8	;	2	10	10	10	9	10	9	9	7	7	9	10	9	9	7	7	9	10	9	9	7	7	53.2	53.2	53.2	27.887	248	248;256	0	61.338	53.2	53.2	45.2	45.2	35.9	41.5	537520000	146200000	115170000	106160000	61018000	53630000
O14828	O14828	1	1	1	Secretory carrier-associated membrane protein 3	SCAMP3		1	1	1	1	1	1	1	0	1	1	1	1	1	0	1	1	1	1	1	0	1	1	4.6	4.6	4.6	38.287	347	347	0	3.3546	4.6	4.6	4.6	0	4.6	4.6	10666000	3176200	2683100	2473500	0	968950
O14907	O14907	1	1	1	Tax1-binding protein 3	TAX1BP3		1	1	1	1	1	1	1	0	0	0	1	1	1	0	0	0	1	1	1	0	0	0	13.7	13.7	13.7	13.735	124	124	0.0010142	2.1549	13.7	13.7	13.7	0	0	0	6497900	2306800	2271000	1920200	0	0
O14964	O14964	1	1	1	Hepatocyte growth factor-regulated tyrosine kinase substrate	HGS		1	1	1	1	1	1	1	0	1	1	1	1	1	0	1	1	1	1	1	0	1	1	1.2	1.2	1.2	86.191	777	777	0.0083488	1.6384	1.2	1.2	1.2	0	1.2	1.2	844580000	297920000	163860000	186830000	0	104020000
O14980	O14980	4	4	4	Exportin-1	XPO1		1	4	4	4	3	1	2	0	0	0	3	1	2	0	0	0	3	1	2	0	0	0	4.9	4.9	4.9	123.38	1071	1071	0	8.4736	3.5	1.1	2.5	0	0	0	12889000	5853100	2908800	4127100	0	0
O15031	O15031	18	18	18	Plexin-B2	PLXNB2		1	18	18	18	10	8	8	6	10	7	10	8	8	6	10	7	10	8	8	6	10	7	14.8	14.8	14.8	205.12	1838	1838	0	37.88	8.1	6.5	6.9	4.7	8.1	5.4	136070000	25674000	22330000	21749000	15258000	30490000
O15127	O15127	1	1	1	Secretory carrier-associated membrane protein 2	SCAMP2		1	1	1	1	1	1	1	0	0	0	1	1	1	0	0	0	1	1	1	0	0	0	6.1	6.1	6.1	36.648	329	329	0	3.5966	6.1	6.1	6.1	0	0	0	5808200	2424700	1731700	1651800	0	0
O15143	O15143	5	5	5	Actin-related protein 2/3 complex subunit 1B	ARPC1B		1	5	5	5	3	5	3	4	2	3	3	5	3	4	2	3	3	5	3	4	2	3	17.2	17.2	17.2	40.949	372	372	0	31.499	12.1	17.2	12.1	16.7	8.6	13.2	123140000	25202000	31927000	15684000	23418000	11942000
O15144	O15144	2	2	2	Actin-related protein 2/3 complex subunit 2	ARPC2		1	2	2	2	1	1	1	1	1	2	1	1	1	1	1	2	1	1	1	1	1	2	7.7	7.7	7.7	34.333	300	300	0	4.5072	4.7	4.7	4.7	3	4.7	7.7	22861000	5522000	4659300	3826000	2365100	1837900
O15145	O15145	3	3	3	Actin-related protein 2/3 complex subunit 3	ARPC3		1	3	3	3	1	2	1	2	0	2	1	2	1	2	0	2	1	2	1	2	0	2	19.7	19.7	19.7	20.546	178	178	0	4.9401	6.2	12.4	6.2	13.5	0	13.5	9142400	1591300	1606800	1612500	2187400	0
O15162	O15162	5	5	5	Phospholipid scramblase 1	PLSCR1		1	5	5	5	2	4	3	3	4	3	2	4	3	3	4	3	2	4	3	3	4	3	16.7	16.7	16.7	35.049	318	318	0	15.124	7.5	16.7	12.6	11.6	11.3	12.6	207790000	5680900	39317000	37026000	35302000	44844000
O15212	O15212	1	1	1	Prefoldin subunit 6	PFDN6		1	1	1	1	0	1	1	0	1	1	0	1	1	0	1	1	0	1	1	0	1	1	9.3	9.3	9.3	14.582	129	129	0	2.8837	0	9.3	9.3	0	9.3	9.3	13530000	0	4059000	3901200	0	2416600
O15230	O15230	54	54	53	Laminin subunit alpha-5	LAMA5		1	54	54	53	31	23	28	36	39	36	31	23	28	36	39	36	31	23	28	36	39	35	21.5	21.5	21.1	399.73	3695	3695	0	263.73	11.8	9.6	11.7	15.2	15.8	14.4	1005700000	143150000	84546000	113150000	204280000	213180000
O15297	O15297	1	1	1	Protein phosphatase 1D	PPM1D		1	1	1	1	1	1	1	1	1	1	1	1	1	1	1	1	1	1	1	1	1	1	1.8	1.8	1.8	66.674	605	605	0.0084826	1.7175	1.8	1.8	1.8	1.8	1.8	1.8	4934900000	1173400000	1118900000	929170000	599460000	592590000
O15372	O15372	1	1	1	Eukaryotic translation initiation factor 3 subunit H	EIF3H		1	1	1	1	0	0	0	0	1	0	0	0	0	0	1	0	0	0	0	0	1	0	5.4	5.4	5.4	39.93	352	352	0.0010173	2.1672	0	0	0	0	5.4	0	4240800	0	0	0	0	4240800
O15438	O15438	4	4	4	Canalicular multispecific organic anion transporter 2	ABCC3		1	4	4	4	2	1	1	2	1	2	2	1	1	2	1	2	2	1	1	2	1	2	3.9	3.9	3.9	169.34	1527	1527	0	6.0219	2.1	1	1	1.9	1	1.8	10876000	3051700	1203200	1004900	2167400	772400
O15484	O15484	3	3	3	Calpain-5	CAPN5		1	3	3	3	3	3	2	2	2	2	3	3	2	2	2	2	3	3	2	2	2	2	6.9	6.9	6.9	73.168	640	640	0	13.183	6.9	6.9	5.3	4.5	4.5	4.5	37293000	9870900	8974300	5618100	3671700	5529000
O15551;O95484;P56747	O15551	6;1;1	6;1;1	5;0;0	Claudin-3	CLDN3		3	6	6	5	6	4	6	3	5	4	6	4	6	3	5	4	5	4	5	3	4	4	23.2	23.2	15.9	23.318	220	220;217;220	0	38.653	23.2	12.7	23.2	15.9	23.2	15.9	295430000	82712000	63379000	58705000	22872000	41910000
O43143	O43143	5	5	5	Pre-mRNA-splicing factor ATP-dependent RNA helicase DHX15	DHX15		1	5	5	5	3	3	3	1	1	1	3	3	3	1	1	1	3	3	3	1	1	1	8.4	8.4	8.4	90.932	795	795	0	9.0259	5.4	4.5	4.5	1.6	1.6	1.6	30499000	8059400	5944900	10400000	2110700	1727600
O43240	O43240	5	5	5	Kallikrein-10	KLK10		1	5	5	5	4	4	5	4	4	3	4	4	5	4	4	3	4	4	5	4	4	3	22.1	22.1	22.1	30.17	276	276	0	20.449	18.1	18.1	22.1	14.5	14.5	10.5	161760000	47483000	42167000	31581000	14251000	14868000
O43242	O43242	5	5	5	26S proteasome non-ATPase regulatory subunit 3	PSMD3		1	5	5	5	4	2	4	2	2	3	4	2	4	2	2	3	4	2	4	2	2	3	12.4	12.4	12.4	60.977	534	534	0	18.749	9.6	4.7	10.3	5.1	4.7	7.9	46533000	13271000	5328800	13281000	4214800	2674400
O43278	O43278	3	3	3	Kunitz-type protease inhibitor 1	SPINT1		1	3	3	3	1	3	2	0	2	0	1	3	2	0	2	0	1	3	2	0	2	0	9.8	9.8	9.8	58.397	529	529	0	9.5227	3.4	9.8	7.2	0	6.4	0	17187000	2143300	7767300	3924200	0	3352100
O43291	O43291	1	1	1	Kunitz-type protease inhibitor 2	SPINT2		1	1	1	1	1	0	0	1	0	0	1	0	0	1	0	0	1	0	0	1	0	0	5.6	5.6	5.6	28.228	252	252	0.0010582	2.5731	5.6	0	0	5.6	0	0	8633700	4382600	0	0	4251100	0
O43324	O43324	2	2	2	Eukaryotic translation elongation factor 1 epsilon-1	EEF1E1		1	2	2	2	2	2	1	2	2	2	2	2	1	2	2	2	2	2	1	2	2	2	12.1	12.1	12.1	19.81	174	174	0	6.3188	12.1	12.1	6.3	12.1	12.1	12.1	41123000	7815700	7702900	7563600	6392900	6236000
O43390	O43390	6	3	3	Heterogeneous nuclear ribonucleoprotein R	HNRNPR		1	6	3	3	4	2	3	1	3	2	2	1	2	0	2	1	2	1	2	0	2	1	10.6	5.7	5.7	70.942	633	633	0	7.1463	6.6	3.9	5.5	1.7	5.8	3.8	8690400	3836400	0	663930	0	2091000
O43399	O43399	3	3	3	Tumor protein D54	TPD52L2		1	3	3	3	1	2	1	0	0	0	1	2	1	0	0	0	1	2	1	0	0	0	20.9	20.9	20.9	22.237	206	206	0	4.235	4.9	11.7	9.2	0	0	0	4249100	1002300	2344500	902230	0	0
O43490	O43490	11	11	11	Prominin-1	PROM1		1	11	11	11	7	9	6	4	5	3	7	9	6	4	5	3	7	9	6	4	5	3	19.4	19.4	19.4	97.201	865	865	0	37.675	12.7	15.5	10.5	7.7	9.1	5.8	118690000	23361000	39885000	21390000	12101000	12909000
O43570	O43570	1	1	1	Carbonic anhydrase 12	CA12		1	1	1	1	0	0	0	1	0	0	0	0	0	1	0	0	0	0	0	1	0	0	4.2	4.2	4.2	39.45	354	354	0.00098232	1.9671	0	0	0	4.2	0	0	1347500	0	0	0	1347500	0
O43633	O43633	4	4	4	Charged multivesicular body protein 2a	CHMP2A		1	4	4	4	3	2	2	2	2	3	3	2	2	2	2	3	3	2	2	2	2	3	15.8	15.8	15.8	25.104	222	222	0	28.034	12.6	8.6	8.6	8.6	8.6	11.7	65714000	14050000	10586000	9142100	10770000	9330500
O43657	O43657	3	3	3	Tetraspanin-6	TSPAN6		1	3	3	3	2	2	2	0	1	1	2	2	2	0	1	1	2	2	2	0	1	1	18	18	18	27.563	245	245	0	14.314	12.7	15.5	15.5	0	10.2	10.2	84141000	26700000	24359000	20715000	0	7649600
O43663	O43663	1	1	1	Protein regulator of cytokinesis 1	PRC1		1	1	1	1	1	0	0	0	1	0	1	0	0	0	1	0	1	0	0	0	1	0	2.7	2.7	2.7	71.606	620	620	0.0085227	1.7439	2.7	0	0	0	2.7	0	6654600	4651400	0	0	0	2003200
O43688	O43688	1	1	1	Lipid phosphate phosphohydrolase 2	PPAP2C		1	1	1	1	1	1	1	0	0	0	1	1	1	0	0	0	1	1	1	0	0	0	5.2	5.2	5.2	32.573	288	288	0.0010571	2.5719	5.2	5.2	5.2	0	0	0	3979800	2548100	1431700	0	0	0
O43707;P35609;Q08043;Q9H254	O43707	47;6;3;1	47;6;3;1	33;0;0;1	Alpha-actinin-4	ACTN4		4	47	47	33	38	36	36	33	33	34	38	36	36	33	33	34	30	26	29	24	24	25	56.8	56.8	42.7	104.85	911	911;894;901;2564	0	279.61	48.6	50.2	49.2	48.3	46.3	46.3	2249100000	480500000	389940000	356860000	302260000	306870000
O43747	O43747	1	1	1	AP-1 complex subunit gamma-1	AP1G1		1	1	1	1	1	0	1	1	1	0	1	0	1	1	1	0	1	0	1	1	1	0	1.7	1.7	1.7	91.35	822	822	0.0010256	2.2803	1.7	0	1.7	1.7	1.7	0	4087200	1259200	0	1270500	734290	823320
O43809	O43809	1	1	1	Cleavage and polyadenylation specificity factor subunit 5	NUDT21		1	1	1	1	1	1	1	1	1	0	1	1	1	1	1	0	1	1	1	1	1	0	7.9	7.9	7.9	26.227	227	227	0	3.4245	7.9	7.9	7.9	7.9	7.9	0	15287000	5096200	4861400	3447300	0	1881700
O43865;Q96HN2	O43865	4;4	4;4	4;4	Putative adenosylhomocysteinase 2;Putative adenosylhomocysteinase 3	AHCYL1;AHCYL2	;	2	4	4	4	0	2	1	1	0	1	0	2	1	1	0	1	0	2	1	1	0	1	8.1	8.1	8.1	58.951	530	530;611	0	4.6958	0	4.2	2.5	1.5	0	1.5	5548300	0	2272700	1099800	1070900	0
O60218;C9JRZ8	O60218	7;3	7;3	7;3	Aldo-keto reductase family 1 member B10	AKR1B10		2	7	7	7	4	4	3	4	4	2	4	4	3	4	4	2	4	4	3	4	4	2	30.1	30.1	30.1	36.019	316	316;316	0	13.41	19.6	18.7	10.8	19.6	15.5	8.5	93429000	18220000	21403000	11484000	16011000	14940000
O60264	O60264	1	1	1	SWI/SNF-related matrix-associated actin-dependent regulator of chromatin subfamily A member 5	SMARCA5		1	1	1	1	1	0	0	0	0	0	1	0	0	0	0	0	1	0	0	0	0	0	1.4	1.4	1.4	121.9	1052	1052	0	6.3116	1.4	0	0	0	0	0	1507600	1507600	0	0	0	0
O60488	O60488	7	7	6	Long-chain-fatty-acid--CoA ligase 4	ACSL4		1	7	7	6	4	4	4	3	4	2	4	4	4	3	4	2	4	4	4	2	3	1	12.4	12.4	9.8	79.187	711	711	0	14.189	7.3	6.2	5.9	5.5	7.3	4.1	58527000	10165000	9550200	6790500	11109000	12299000
O60506	O60506	10	10	7	Heterogeneous nuclear ribonucleoprotein Q	SYNCRIP		1	10	10	7	7	5	5	3	2	2	7	5	5	3	2	2	5	4	4	2	1	1	18.9	18.9	14	69.602	623	623	0	25.003	11.6	11.2	12.5	5.9	3.9	3.9	78854000	28450000	17785000	15473000	6758100	4497400
O60513	O60513	2	2	2	Beta-1,4-galactosyltransferase 4;N-acetyllactosamine synthase;Lactotriaosylceramide beta-1,4-galactosyltransferase	B4GALT4		1	2	2	2	2	1	1	0	1	1	2	1	1	0	1	1	2	1	1	0	1	1	8.1	8.1	8.1	40.041	344	344	0	6.2902	8.1	5.2	5.2	0	5.2	5.2	21333000	6692500	5161200	4119700	0	2988100
O60547	O60547	6	6	6	GDP-mannose 4,6 dehydratase	GMDS		1	6	6	6	6	4	2	2	1	3	6	4	2	2	1	3	6	4	2	2	1	3	23.4	23.4	23.4	41.949	372	372	0	15.736	23.4	15.1	7.5	8.6	5.4	10.8	65185000	25665000	18059000	5283000	8443900	3199700
O60568	O60568	3	3	3	Procollagen-lysine,2-oxoglutarate 5-dioxygenase 3	PLOD3		1	3	3	3	0	0	0	1	1	2	0	0	0	1	1	2	0	0	0	1	1	2	5.1	5.1	5.1	84.784	738	738	0	2.7704	0	0	0	2.2	1.9	3.3	4912200	0	0	0	1844900	955330
O60635	O60635	3	3	3	Tetraspanin-1	TSPAN1		1	3	3	3	2	3	3	1	1	1	2	3	3	1	1	1	2	3	3	1	1	1	8.3	8.3	8.3	26.301	241	241	0	14.96	7.5	8.3	8.3	5.4	5.4	5.4	510100000	118800000	122830000	70911000	75803000	51636000
O60637	O60637	1	1	1	Tetraspanin-3	TSPAN3		1	1	1	1	1	1	1	1	1	1	1	1	1	1	1	1	1	1	1	1	1	1	2.8	2.8	2.8	28.017	253	253	0	2.8528	2.8	2.8	2.8	2.8	2.8	2.8	65087000	16419000	11577000	12998000	7962900	8268200
O60701	O60701	12	12	12	UDP-glucose 6-dehydrogenase	UGDH		1	12	12	12	12	8	8	8	8	7	12	8	8	8	8	7	12	8	8	8	8	7	35.2	35.2	35.2	55.023	494	494	0	54.666	35.2	23.3	21.9	21.3	23.5	21.1	229720000	59828000	46215000	41533000	28496000	26631000
O60716	O60716	26	26	26	Catenin delta-1	CTNND1		1	26	26	26	19	15	17	16	18	15	19	15	17	16	18	15	19	15	17	16	18	15	31.6	31.6	31.6	108.17	968	968	0	123.54	24.6	20.6	22.4	21.5	24.6	21.4	772600000	143750000	124690000	129370000	137890000	111530000
O60784	O60784	2	2	2	Target of Myb protein 1	TOM1		1	2	2	2	0	1	0	1	0	0	0	1	0	1	0	0	0	1	0	1	0	0	5.9	5.9	5.9	53.818	492	492	0	2.8924	0	3.3	0	2.6	0	0	1260700	0	649920	0	610780	0
O60832	O60832	9	9	9	H/ACA ribonucleoprotein complex subunit 4	DKC1		1	9	9	9	8	8	6	6	4	2	8	8	6	6	4	2	8	8	6	6	4	2	26.1	26.1	26.1	57.673	514	514	0	33.47	21.4	24.7	16.9	19.3	13.4	6.2	124030000	33926000	34697000	21178000	15364000	11574000
O60884	O60884	7	7	7	DnaJ homolog subfamily A member 2	DNAJA2		1	7	7	7	4	3	2	3	3	3	4	3	2	3	3	3	4	3	2	3	3	3	21.1	21.1	21.1	45.745	412	412	0	11.869	12.4	7.5	5.1	8.7	7.5	11.2	61378000	16804000	11148000	10135000	7357600	9729100
O75054	O75054	2	2	2	Immunoglobulin superfamily member 3	IGSF3		1	2	2	2	0	0	1	0	0	1	0	0	1	0	0	1	0	0	1	0	0	1	2.4	2.4	2.4	135.19	1194	1194	0	2.9497	0	0	0.8	0	0	1.6	2306700	0	0	863010	0	0
O75083	O75083	14	14	14	WD repeat-containing protein 1	WDR1		1	14	14	14	10	10	9	8	8	9	10	10	9	8	8	9	10	10	9	8	8	9	37.5	37.5	37.5	66.193	606	606	0	56.789	26.9	26.2	25.4	21.5	22.3	22.8	312130000	79615000	67336000	43098000	45646000	38743000
O75131;Q96FN4;Q8IYJ1;Q96A23;O95741;Q86YQ8;Q9HCH3;Q9UBL6	O75131	6;1;1;1;1;1;1;1	6;1;1;1;1;1;1;1	6;1;1;1;1;1;1;1	Copine-3	CPNE3		8	6	6	6	6	3	4	2	2	2	6	3	4	2	2	2	6	3	4	2	2	2	14.9	14.9	14.9	60.13	537	537;548;553;557;557;564;593;633	0	12.202	14.9	6.5	9.5	3.9	4.7	3.9	45781000	17592000	10166000	11099000	3019100	1187800
O75340	O75340	8	8	8	Programmed cell death protein 6	PDCD6		1	8	8	8	8	6	6	8	7	8	8	6	6	8	7	8	8	6	6	8	7	8	51.3	51.3	51.3	21.868	191	191	0	36.572	51.3	46.1	42.4	51.3	46.1	51.3	472820000	92477000	85578000	87530000	71051000	70163000
O75347	O75347	1	1	1	Tubulin-specific chaperone A	TBCA		1	1	1	1	1	0	1	1	1	0	1	0	1	1	1	0	1	0	1	1	1	0	16.7	16.7	16.7	12.855	108	108	0	3.6565	16.7	0	16.7	16.7	16.7	0	15276000	6876000	0	3004800	1848200	3547200
O75351	O75351	6	6	5	Vacuolar protein sorting-associated protein 4B	VPS4B		1	6	6	5	2	4	5	4	3	5	2	4	5	4	3	5	1	3	4	3	2	4	20.5	20.5	17.8	49.301	444	444	0	17.938	7	14.4	18	14.4	10.8	16.9	81998000	11796000	16126000	15072000	13849000	10271000
O75367;Q9P0M6	O75367	18;2	18;2	18;2	Core histone macro-H2A.1	H2AFY		2	18	18	18	14	16	13	13	13	10	14	16	13	13	13	10	14	16	13	13	13	10	50	50	50	39.617	372	372;372	0	113.77	43	43.5	38.2	40.6	44.6	35.8	1510900000	439570000	358780000	283500000	138940000	127460000
O75369;Q14315	O75369	28;3	28;3	27;2	Filamin-B	FLNB		2	28	28	27	15	14	12	14	17	14	15	14	12	14	17	14	15	14	12	14	16	14	15.8	15.8	15.5	278.16	2602	2602;2725	0	72.752	9.8	8.9	8	8.4	9.3	9	258240000	48659000	40891000	43559000	37932000	44120000
O75400	O75400	3	3	3	Pre-mRNA-processing factor 40 homolog A	PRPF40A		1	3	3	3	3	2	0	1	0	1	3	2	0	1	0	1	3	2	0	1	0	1	5	5	5	108.8	957	957	0	12.46	5	2.9	0	1.7	0	1.7	37181000	17807000	16700000	0	1313800	0
O75487	O75487	2	2	2	Glypican-4;Secreted glypican-4	GPC4		1	2	2	2	2	1	1	0	1	0	2	1	1	0	1	0	2	1	1	0	1	0	5.4	5.4	5.4	62.411	556	556	0	3.2608	5.4	2.7	2.7	0	2.7	0	9905600	4393000	2475100	1801100	0	1236500
O75531	O75531	8	8	8	Barrier-to-autointegration factor;Barrier-to-autointegration factor, N-terminally processed	BANF1		1	8	8	8	7	7	7	4	6	5	7	7	7	4	6	5	7	7	7	4	6	5	59.6	59.6	59.6	10.058	89	89	0	35.101	59.6	58.4	58.4	47.2	58.4	58.4	465630000	99970000	89642000	114370000	60337000	69543000
O75533	O75533	8	8	8	Splicing factor 3B subunit 1	SF3B1		1	8	8	8	8	3	5	3	3	3	8	3	5	3	3	3	8	3	5	3	3	3	8.5	8.5	8.5	145.83	1304	1304	0	16.51	8.5	2.9	5.6	2.8	3.7	2.8	89753000	34618000	13647000	16653000	7621500	9669200
O75607	O75607	1	1	1	Nucleoplasmin-3	NPM3		1	1	1	1	1	1	1	1	1	1	1	1	1	1	1	1	1	1	1	1	1	1	9	9	9	19.343	178	178	0	12.803	9	9	9	9	9	9	13532000	2820100	2303500	3146800	1997900	1534100
O75643	O75643	4	4	4	U5 small nuclear ribonucleoprotein 200 kDa helicase	SNRNP200		1	4	4	4	3	2	3	1	1	1	3	2	3	1	1	1	3	2	3	1	1	1	2.6	2.6	2.6	244.5	2136	2136	0	9.8404	1.7	1.3	2.1	0.9	0.9	0.9	16859000	4130400	2951900	4551300	1840400	1447300
O75674	O75674	2	2	2	TOM1-like protein 1	TOM1L1		1	2	2	2	0	2	0	0	1	1	0	2	0	0	1	1	0	2	0	0	1	1	4.8	4.8	4.8	52.988	476	476	0	2.6328	0	4.8	0	0	2.1	2.7	10665000	0	5121200	0	0	3038500
O75695	O75695	2	2	2	Protein XRP2	RP2		1	2	2	2	0	1	0	2	0	0	0	1	0	2	0	0	0	1	0	2	0	0	5.1	5.1	5.1	39.641	350	350	0.0084349	1.6905	0	2.9	0	5.1	0	0	4170500	0	1105200	0	3065200	0
O75787	O75787	4	4	4	Renin receptor	ATP6AP2		1	4	4	4	1	4	4	2	3	2	1	4	4	2	3	2	1	4	4	2	3	2	15.7	15.7	15.7	39.008	350	350	0	16.713	2.3	15.7	15.7	4.9	10	4.9	45347000	5565000	11394000	13282000	4764800	6581500
O75874	O75874	2	2	2	Isocitrate dehydrogenase [NADP] cytoplasmic	IDH1		1	2	2	2	0	1	2	0	0	1	0	1	2	0	0	1	0	1	2	0	0	1	6.3	6.3	6.3	46.659	414	414	0	3.1766	0	3.1	6.3	0	0	3.1	5071900	0	987760	2274500	0	0
O75955	O75955	5	5	5	Flotillin-1	FLOT1		1	5	5	5	4	1	3	2	2	3	4	1	3	2	2	3	4	1	3	2	2	3	14.5	14.5	14.5	47.355	427	427	0	20.974	12.6	4.2	9.6	5.6	5.6	7.5	44300000	12741000	4107400	8320000	5740500	4996400
O75976	O75976	3	3	3	Carboxypeptidase D	CPD		1	3	3	3	1	1	2	0	0	1	1	1	2	0	0	1	1	1	2	0	0	1	4.4	4.4	4.4	152.93	1380	1380	0	3.1906	2.5	0.9	3.4	0	0	1	11266000	3610200	1121000	3892200	0	0
O76021	O76021	25	25	25	Ribosomal L1 domain-containing protein 1	RSL1D1		1	25	25	25	18	20	14	8	7	9	18	20	14	8	7	9	18	20	14	8	7	9	41	41	41	54.972	490	490	0	66.768	32.7	39.6	31.2	17.8	17.1	19.4	404530000	121760000	127310000	78854000	26387000	24109000
O76094	O76094	1	1	1	Signal recognition particle subunit SRP72	SRP72		1	1	1	1	0	0	1	0	0	1	0	0	1	0	0	1	0	0	1	0	0	1	1.9	1.9	1.9	74.605	671	671	0.00097656	1.9417	0	0	1.9	0	0	1.9	2284900	0	0	1286500	0	0
O94760	O94760	3	3	3	N(G),N(G)-dimethylarginine dimethylaminohydrolase 1	DDAH1		1	3	3	3	1	1	1	2	2	0	1	1	1	2	2	0	1	1	1	2	2	0	16.5	16.5	16.5	31.121	285	285	0	6.7017	9.1	9.1	9.1	12.6	7.4	0	18815000	2965300	4204400	3640900	3428200	4576500
O94832	O94832	12	12	12	Unconventional myosin-Id	MYO1D		1	12	12	12	7	6	7	5	5	7	7	6	7	5	5	7	7	6	7	5	5	7	15	15	15	116.2	1006	1006	0	24.036	9.9	8.9	10.3	6.4	5.9	8.3	83643000	23353000	11042000	12954000	11826000	10004000
O94886	O94886	2	2	2	CSC1-like protein 1	TMEM63A		1	2	2	2	1	0	0	0	1	0	1	0	0	0	1	0	1	0	0	0	1	0	3	3	3	92.125	807	807	0	3.7136	1.5	0	0	0	1.5	0	8858500	2333500	0	0	0	6525000
O94919	O94919	1	1	1	Endonuclease domain-containing 1 protein	ENDOD1		1	1	1	1	0	0	1	0	1	0	0	0	1	0	1	0	0	0	1	0	1	0	2.6	2.6	2.6	55.016	500	500	0	4.017	0	0	2.6	0	2.6	0	2848400	0	0	1207900	0	1640500
O94985	O94985	7	7	7	Calsyntenin-1;Soluble Alc-alpha;CTF1-alpha	CLSTN1		1	7	7	7	4	4	4	6	3	3	4	4	4	6	3	3	4	4	4	6	3	3	8.7	8.7	8.7	109.79	981	981	0	16.385	5.3	5.6	5.3	7.5	3.8	4.4	63543000	13098000	14506000	12680000	10736000	3960600
O95154	O95154	2	2	1	Aflatoxin B1 aldehyde reductase member 3	AKR7A3		1	2	2	1	0	1	0	0	1	0	0	1	0	0	1	0	0	0	0	0	1	0	7.6	7.6	4.5	37.206	331	331	0.0083955	1.6605	0	3	0	0	4.5	0	3066900	0	1789900	0	0	1277000
O95197	O95197	2	2	2	Reticulon-3	RTN3		1	2	2	2	1	1	1	2	1	1	1	1	1	2	1	1	1	1	1	2	1	1	4.8	4.8	4.8	112.61	1032	1032	0	7.6011	1.1	1.1	1.1	4.8	1.1	1.1	44730000	11182000	0	10693000	13105000	3240300
O95232	O95232	3	3	3	Luc7-like protein 3	LUC7L3		1	3	3	3	3	2	3	0	0	0	3	2	3	0	0	0	3	2	3	0	0	0	9.5	9.5	9.5	51.466	432	432	0	7.2479	9.5	6.2	9.5	0	0	0	11481000	4668200	2687600	4125100	0	0
O95249	O95249	1	1	1	Golgi SNAP receptor complex member 1	GOSR1		1	1	1	1	1	0	0	0	0	0	1	0	0	0	0	0	1	0	0	0	0	0	5.2	5.2	5.2	28.612	250	250	0.0010331	2.3909	5.2	0	0	0	0	0	1434500	1434500	0	0	0	0
O95297	O95297	4	4	4	Myelin protein zero-like protein 1	MPZL1		1	4	4	4	4	3	3	1	2	1	4	3	3	1	2	1	4	3	3	1	2	1	18.2	18.2	18.2	29.082	269	269	0	10.192	18.2	14.5	14.5	5.6	9.7	5.6	51034000	16432000	11029000	9852900	3343300	6248800
O95373	O95373	3	3	3	Importin-7	IPO7		1	3	3	3	3	1	1	1	0	0	3	1	1	1	0	0	3	1	1	1	0	0	3.9	3.9	3.9	119.52	1038	1038	0	6.7659	3.9	1.7	0.9	1.3	0	0	13139000	7941900	1828000	1346300	2022800	0
O95395	O95395	26	26	26	Beta-1,3-galactosyl-O-glycosyl-glycoprotein beta-1,6-N-acetylglucosaminyltransferase 3	GCNT3		1	26	26	26	16	19	16	25	22	19	16	19	16	25	22	19	16	19	16	25	22	19	58.2	58.2	58.2	50.863	438	438	0	143.89	36.8	45	42.7	57.8	50.9	46.8	1359000000	172050000	160050000	127890000	332140000	287930000
O95399	O95399	1	1	1	Urotensin-2	UTS2		1	1	1	1	1	0	1	0	0	0	1	0	1	0	0	0	1	0	1	0	0	0	6.5	6.5	6.5	14.295	124	124	0	4.2223	6.5	0	6.5	0	0	0	0	0	0	0	0	0
O95630	O95630	1	1	1	STAM-binding protein	STAMBP		1	1	1	1	1	1	1	0	0	0	1	1	1	0	0	0	1	1	1	0	0	0	3.5	3.5	3.5	48.076	424	424	0	2.8332	3.5	3.5	3.5	0	0	0	4074100	1848500	1194700	1031000	0	0
O95816	O95816	4	4	4	BAG family molecular chaperone regulator 2	BAG2		1	4	4	4	3	3	3	2	4	3	3	3	3	2	4	3	3	3	3	2	4	3	20.9	20.9	20.9	23.772	211	211	0	8.5608	13.7	16.6	16.6	9.5	20.9	13.7	58099000	11801000	9710200	11431000	5563700	9694800
O95819;Q8N4C8;Q9UKE5	O95819	3;3;3	3;3;3	3;3;3	Mitogen-activated protein kinase kinase kinase kinase 4;Misshapen-like kinase 1;TRAF2 and NCK-interacting protein kinase	MAP4K4;MINK1;TNIK	;;	3	3	3	3	1	2	2	2	2	2	1	2	2	2	2	2	1	2	2	2	2	2	2.8	2.8	2.8	142.1	1239	1239;1332;1360	0	5.2899	1	1.9	1.9	1.9	1.9	1.9	30583000	3169400	4522400	3765700	6572900	7840600
O95858	O95858	1	1	1	Tetraspanin-15	TSPAN15		1	1	1	1	0	1	1	1	0	1	0	1	1	1	0	1	0	1	1	1	0	1	4.1	4.1	4.1	33.165	294	294	0	5.0268	0	4.1	4.1	4.1	0	4.1	12228000	0	4559500	3102300	2543900	0
O95994;Q8TD06	O95994	4;1	4;1	4;1	Anterior gradient protein 2 homolog	AGR2		2	4	4	4	3	4	3	2	2	2	3	4	3	2	2	2	3	4	3	2	2	2	22.3	22.3	22.3	19.979	175	175;166	0	12.644	22.3	22.3	16	10.3	10.3	16.6	103180000	25897000	23551000	23614000	10784000	8255900
P00338	P00338	16	16	15	L-lactate dehydrogenase A chain	LDHA		1	16	16	15	11	12	15	10	10	11	11	12	15	10	10	11	10	11	14	9	9	10	41.6	41.6	38	36.688	332	332	0	102.2	34.9	34.9	41.6	32.2	35.5	35.5	1217400000	324230000	246680000	281110000	114030000	116440000
P00352;P05091;P47895;P30837;O94788	P00352	19;3;1;1;1	19;3;1;1;1	19;3;1;1;1	Retinal dehydrogenase 1	ALDH1A1		5	19	19	19	11	11	15	8	8	9	11	11	15	8	8	9	11	11	15	8	8	9	41.7	41.7	41.7	54.861	501	501;517;512;517;518	0	71.556	28.5	31.3	35.1	19.4	22.4	23.8	481010000	96693000	107740000	105630000	59403000	50724000
P00367;P49448	P00367	6;4	6;4	6;4	Glutamate dehydrogenase 1, mitochondrial;Glutamate dehydrogenase 2, mitochondrial	GLUD1;GLUD2	;	2	6	6	6	5	4	1	1	1	0	5	4	1	1	1	0	5	4	1	1	1	0	13.3	13.3	13.3	61.397	558	558;558	0	8.9757	11.1	10.2	2.5	2.2	2.2	0	24033000	8983700	7692900	835500	3129800	3390900
P00441	P00441	3	3	3	Superoxide dismutase [Cu-Zn]	SOD1		1	3	3	3	3	2	3	0	1	1	3	2	3	0	1	1	3	2	3	0	1	1	43.5	43.5	43.5	15.936	154	154	0	21.867	43.5	30.5	43.5	0	9.1	9.1	48627000	14044000	12662000	11681000	0	4949400
P00491	P00491	1	1	1	Purine nucleoside phosphorylase	PNP		1	1	1	1	1	1	1	1	0	1	1	1	1	1	0	1	1	1	1	1	0	1	3.5	3.5	3.5	32.118	289	289	0.0092336	1.5955	3.5	3.5	3.5	3.5	0	3.5	8379500	2256900	2151300	1641500	981020	0
P00533;Q15303	P00533	4;1	4;1	3;0	Epidermal growth factor receptor	EGFR		2	4	4	3	3	2	2	3	0	2	3	2	2	3	0	2	2	1	2	2	0	2	4.5	4.5	3.5	134.28	1210	1210;1308	0	7.2054	3.6	2.3	2.1	3.6	0	2.1	15936000	4222900	3419000	2158400	4184700	0
P00558;P07205	P00558	20;4	20;4	20;4	Phosphoglycerate kinase 1	PGK1		2	20	20	20	18	15	15	11	14	12	18	15	15	11	14	12	18	15	15	11	14	12	59.2	59.2	59.2	44.614	417	417;417	0	105.6	56.4	51.6	49.2	39.3	48	41.7	973480000	251230000	201330000	174040000	114720000	120090000
P00568	P00568	1	1	1	Adenylate kinase isoenzyme 1	AK1		1	1	1	1	0	0	1	1	1	0	0	0	1	1	1	0	0	0	1	1	1	0	6.2	6.2	6.2	21.635	194	194	0	2.6674	0	0	6.2	6.2	6.2	0	2407900	0	0	960200	750140	697590
P01033	P01033	2	2	2	Metalloproteinase inhibitor 1	TIMP1		1	2	2	2	2	0	0	0	1	0	2	0	0	0	1	0	2	0	0	0	1	0	15	15	15	23.171	207	207	0	6.6064	15	0	0	0	5.8	0	6408300	4721800	0	0	0	1686500
P01034	P01034	2	2	2	Cystatin-C	CST3		1	2	2	2	1	1	0	1	0	1	1	1	0	1	0	1	1	1	0	1	0	1	23.3	23.3	23.3	15.799	146	146	0.0010246	2.2739	11.6	11.6	0	11.6	0	11.6	10106000	2884200	2533100	0	2258800	0
P01111	P01111	4	2	1	GTPase NRas	NRAS		1	4	2	1	3	2	1	4	3	2	1	0	0	2	2	0	1	0	0	1	1	0	28	15.9	7.9	21.229	189	189	0	4.3149	20.1	12.2	5.8	28	21.7	12.2	9259800	2444700	0	0	3499000	3316000
P01116	P01116	4	4	1	GTPase KRas;GTPase KRas, N-terminally processed	KRAS		1	4	4	1	2	3	2	3	2	4	2	3	2	3	2	4	0	1	0	1	1	1	28	28	7.9	21.656	189	189	0	8.4744	12.2	20.1	13.8	20.1	13.8	28	64378000	10654000	10649000	12076000	9532300	6758700
P01213	P01213	1	1	1	Proenkephalin-B;Alpha-neoendorphin;Beta-neoendorphin;Big dynorphin;Dynorphin A(1-17);Dynorphin A(1-13);Dynorphin A(1-8);Leu-enkephalin;Rimorphin;Leumorphin	PDYN		1	1	1	1	1	1	1	0	1	1	1	1	1	0	1	1	1	1	1	0	1	1	2.8	2.8	2.8	28.385	254	254	0.0085066	1.735	2.8	2.8	2.8	0	2.8	2.8	25786000	7405600	5804400	3951700	0	4256600
P02545;Q03252	P02545	20;1	20;1	19;0	Prelamin-A/C;Lamin-A/C	LMNA		2	20	20	19	15	16	11	7	9	9	15	16	11	7	9	9	15	15	11	7	8	9	33.3	33.3	32.1	74.139	664	664;620	0	69.13	24.8	27.1	19.1	13	15.7	16.6	254850000	73992000	65889000	42869000	23150000	24521000
P02751	P02751	4	4	4	Fibronectin;Anastellin;Ugl-Y1;Ugl-Y2;Ugl-Y3	FN1		1	4	4	4	0	0	0	3	3	3	0	0	0	3	3	3	0	0	0	3	3	3	2.4	2.4	2.4	262.62	2386	2386	0	9.943	0	0	0	1.7	1.7	1.7	18848000	0	0	0	5907700	6614100
P02786	P02786	9	9	9	Transferrin receptor protein 1;Transferrin receptor protein 1, serum form	TFRC		1	9	9	9	5	6	4	4	4	5	5	6	4	4	4	5	5	6	4	4	4	5	15.3	15.3	15.3	84.87	760	760	0	27.431	8.7	11.7	7.2	7.5	7.5	9.3	87677000	18890000	19696000	12028000	12477000	9583100
P02792	P02792	2	2	2	Ferritin light chain	FTL		1	2	2	2	0	1	0	0	1	1	0	1	0	0	1	1	0	1	0	0	1	1	17.7	17.7	17.7	20.019	175	175	0	3.3599	0	8.6	0	0	9.1	9.1	4816500	0	1523400	0	0	1776000
P02794	P02794	5	5	5	Ferritin heavy chain;Ferritin heavy chain, N-terminally processed	FTH1		1	5	5	5	1	1	1	3	2	2	1	1	1	3	2	2	1	1	1	3	2	2	31.1	31.1	31.1	21.225	183	183	0	8.3819	3.8	13.1	3.8	22.4	11.5	8.2	60458000	2627900	8191400	1783000	25655000	10254000
P04075;P05062	P04075	22;1	22;1	18;0	Fructose-bisphosphate aldolase A	ALDOA		2	22	22	18	18	17	16	17	16	16	18	17	16	17	16	16	15	15	13	15	12	13	62.9	62.9	51.4	39.42	364	364;364	0	129.1	58.2	54.1	51.1	54.7	51.1	52.5	1324400000	321940000	260940000	240860000	177520000	168970000
P04080	P04080	3	3	3	Cystatin-B	CSTB		1	3	3	3	2	3	2	3	1	3	2	3	2	3	1	3	2	3	2	3	1	3	45.9	45.9	45.9	11.139	98	98	0	6.7122	33.7	45.9	33.7	45.9	12.2	45.9	72575000	13290000	19302000	7375800	16047000	4132300
P04083	P04083	23	23	23	Annexin A1	ANXA1		1	23	23	23	20	19	16	13	12	14	20	19	16	13	12	14	20	19	16	13	12	14	59.2	59.2	59.2	38.714	346	346	0	197.53	54.3	59.2	45.1	48.3	42.2	50.6	1686200000	553730000	403630000	351000000	130560000	124770000
P04114	P04114	6	3	3	Apolipoprotein B-100;Apolipoprotein B-48	APOB		1	6	3	3	0	0	0	4	4	3	0	0	0	3	2	3	0	0	0	3	2	3	1.5	0.7	0.7	515.6	4563	4563	0	4.3974	0	0	0	1	1.1	0.7	24345000	0	0	0	9636300	5825800
P04156	P04156	1	1	1	Major prion protein	PRNP		1	1	1	1	1	0	1	1	1	0	1	0	1	1	1	0	1	0	1	1	1	0	4.7	4.7	4.7	27.661	253	253	0.0010194	2.1825	4.7	0	4.7	4.7	4.7	0	5975200	1569400	0	1436800	1540000	1429000
P04406;O14556	P04406	20;1	20;1	20;1	Glyceraldehyde-3-phosphate dehydrogenase	GAPDH		2	20	20	20	17	15	16	11	15	15	17	15	16	11	15	15	17	15	16	11	15	15	62.4	62.4	62.4	36.053	335	335;408	0	283.48	51	44.8	51.9	36.4	47.2	43.9	3690000000	915460000	734540000	657640000	435190000	484140000
P04424	P04424	1	1	1	Argininosuccinate lyase	ASL		1	1	1	1	1	0	0	0	0	0	1	0	0	0	0	0	1	0	0	0	0	0	2.4	2.4	2.4	51.657	464	464	0.0084986	1.7198	2.4	0	0	0	0	0	1388700	1388700	0	0	0	0
P04792	P04792	3	3	3	Heat shock protein beta-1	HSPB1		1	3	3	3	2	2	2	2	2	1	2	2	2	2	2	1	2	2	2	2	2	1	21	21	21	22.782	205	205	0	16.935	13.2	13.2	13.2	13.2	16.1	8.3	40642000	10336000	7443100	7839000	6673600	3966200
P04843	P04843	11	11	11	Dolichyl-diphosphooligosaccharide--protein glycosyltransferase subunit 1	RPN1		1	11	11	11	7	6	7	1	2	2	7	6	7	1	2	2	7	6	7	1	2	2	23.7	23.7	23.7	68.569	607	607	0	17.553	15.3	11.5	15.7	2	4	4	46455000	13655000	12539000	15665000	0	2088900
P04844	P04844	2	2	2	Dolichyl-diphosphooligosaccharide--protein glycosyltransferase subunit 2	RPN2		1	2	2	2	2	2	2	1	1	0	2	2	2	1	1	0	2	2	2	1	1	0	4	4	4	69.283	631	631	0	3.7268	4	4	4	2.7	2.7	0	16518000	4631800	4052900	3675700	2326200	1831700
P04899	P04899	10	4	4	Guanine nucleotide-binding protein G(i) subunit alpha-2	GNAI2		1	10	4	4	9	10	7	9	7	7	4	4	3	4	2	2	4	4	3	4	2	2	36.6	20.8	20.8	40.45	355	355	0	23.826	35.8	36.6	29	35.8	27.9	26.8	102040000	28136000	25525000	13490000	18614000	7068500
P05023;P13637;P50993;Q13733;P20648	P05023	38;13;12;7;3	38;13;12;7;3	35;10;9;4;1	Sodium/potassium-transporting ATPase subunit alpha-1	ATP1A1		5	38	38	35	21	26	25	25	28	29	21	26	25	25	28	29	18	23	22	22	25	26	38.9	38.9	36	112.89	1023	1023;1013;1020;1029;1035	0	213.71	24.5	29	28.9	29.9	33.2	31	1732800000	322930000	302640000	295850000	280640000	253680000
P05026	P05026	13	13	13	Sodium/potassium-transporting ATPase subunit beta-1	ATP1B1		1	13	13	13	7	11	8	7	9	8	7	11	8	7	9	8	7	11	8	7	9	8	43.6	43.6	43.6	35.061	303	303	0	71.169	32.3	38	30.7	26.7	30.4	27.4	634330000	154160000	128900000	104420000	78575000	89829000
P05067	P05067	1	1	1	Amyloid beta A4 protein;N-APP;Soluble APP-alpha;Soluble APP-beta;C99;Beta-amyloid protein 42;Beta-amyloid protein 40;C83;P3(42);P3(40);C80;Gamma-secretase C-terminal fragment 59;Gamma-secretase C-terminal fragment 57;Gamma-secretase C-terminal fragment 50;C31	APP		1	1	1	1	1	0	0	0	0	1	1	0	0	0	0	1	1	0	0	0	0	1	1.6	1.6	1.6	86.942	770	770	0	5.2966	1.6	0	0	0	0	1.6	5263000	3111100	0	0	0	0
P05141;P12235;Q9H0C2	P05141	8;4;2	8;4;2	3;0;0	ADP/ATP translocase 2;ADP/ATP translocase 2, N-terminally processed;ADP/ATP translocase 1	SLC25A5;SLC25A4	;	3	8	8	3	4	4	5	3	5	3	4	4	5	3	5	3	0	2	2	1	2	1	26.5	26.5	11.1	32.852	298	298;298;315	0	11.894	13.1	14.8	17.8	10.4	16.4	10.4	97337000	18049000	19138000	16524000	7996700	24138000
P05161	P05161	2	2	2	Ubiquitin-like protein ISG15	ISG15		1	2	2	2	2	2	1	2	1	1	2	2	1	2	1	1	2	2	1	2	1	1	13.3	13.3	13.3	17.887	165	165	0	7.7155	13.3	13.3	5.5	13.3	7.9	5.5	70558000	22418000	14016000	10916000	11236000	3524000
P05362	P05362	3	3	3	Intercellular adhesion molecule 1	ICAM1		1	3	3	3	2	0	0	1	2	0	2	0	0	1	2	0	2	0	0	1	2	0	6.2	6.2	6.2	57.825	532	532	0	3.115	4.3	0	0	1.9	3.6	0	5304100	3345000	0	0	640640	1318400
P05386	P05386	2	2	2	60S acidic ribosomal protein P1	RPLP1		1	2	2	2	1	2	2	2	2	2	1	2	2	2	2	2	1	2	2	2	2	2	51.8	51.8	51.8	11.514	114	114	0	27.196	37.7	51.8	51.8	51.8	51.8	51.8	325630000	49454000	85028000	88944000	38291000	31252000
P05387	P05387	9	9	9	60S acidic ribosomal protein P2	RPLP2		1	9	9	9	7	8	7	5	5	5	7	8	7	5	5	5	7	8	7	5	5	5	80.9	80.9	80.9	11.665	115	115	0	79.983	73.9	80.9	73.9	69.6	69.6	69.6	894140000	272930000	192230000	178260000	92823000	85667000
P05388;Q8NHW5	P05388	8;4	8;4	8;4	60S acidic ribosomal protein P0;60S acidic ribosomal protein P0-like	RPLP0;RPLP0P6	;	2	8	8	8	7	7	6	5	3	4	7	7	6	5	3	4	7	7	6	5	3	4	33.8	33.8	33.8	34.273	317	317;317	0	54.587	33.8	33.8	29.3	28.4	20.2	25.2	660890000	195890000	173040000	118670000	62407000	54423000
P05455	P05455	1	1	1	Lupus La protein	SSB		1	1	1	1	1	1	0	0	0	0	1	1	0	0	0	0	1	1	0	0	0	0	3.9	3.9	3.9	46.836	408	408	0	2.9005	3.9	3.9	0	0	0	0	3495400	1695300	1800100	0	0	0
P05534;P30447;P01893;P17693;P30511;P13747	P05534	19;16;6;1;1;1	19;16;6;1;1;1	5;3;0;0;0;0	HLA class I histocompatibility antigen, A-24 alpha chain;HLA class I histocompatibility antigen, A-23 alpha chain	HLA-A	;	6	19	19	5	15	14	11	14	11	12	15	14	11	14	11	12	5	3	2	5	5	4	61.1	61.1	12.1	40.688	365	365;365;362;338;346;358	0	213.7	54.2	48.5	39.2	49.3	40	46	1722900000	315570000	284270000	263210000	279760000	272670000
P05556	P05556	16	16	16	Integrin beta-1	ITGB1		1	16	16	16	10	12	12	12	15	14	10	12	12	12	15	14	10	12	12	12	15	14	21.2	21.2	21.2	88.414	798	798	0	75.006	14.8	16.8	15.7	17.3	18.5	17.3	580830000	80514000	87623000	95946000	82056000	117610000
P05937;P22676	P05937	1;1	1;1	1;1	Calbindin;Calretinin	CALB1;CALB2	;	2	1	1	1	1	1	1	1	1	1	1	1	1	1	1	1	1	1	1	1	1	1	4.2	4.2	4.2	30.025	261	261;271	0.000999	2.0734	4.2	4.2	4.2	4.2	4.2	4.2	18551000	3080200	4563000	2966200	2561200	2289800
P06280	P06280	3	3	3	Alpha-galactosidase A	GLA		1	3	3	3	1	1	2	2	2	0	1	1	2	2	2	0	1	1	2	2	2	0	9.3	9.3	9.3	48.766	429	429	0	3.9818	2.8	2.8	7	6.5	7	0	12882000	2334500	2045400	2872000	2634700	2995300
P06396;CON__Q3SX14;REV__Q6TDU7	P06396	20;14;1	20;14;1	20;14;1	Gelsolin	GSN	;	3	20	20	20	13	17	13	8	8	6	13	17	13	8	8	6	13	17	13	8	8	6	32	32	32	85.696	782	782;781;716	0	68.581	23.5	26.6	23.5	15.3	15.1	9.1	433380000	127130000	102680000	91910000	45388000	38566000
P06454	P06454	2	2	2	Prothymosin alpha;Prothymosin alpha, N-terminally processed;Thymosin alpha-1	PTMA		1	2	2	2	2	1	1	1	2	1	2	1	1	1	2	1	2	1	1	1	2	1	25.2	25.2	25.2	12.203	111	111	0	15.609	25.2	12.6	12.6	12.6	25.2	12.6	57156000	16520000	7213200	7755100	7650400	11060000
P06576	P06576	6	6	6	ATP synthase subunit beta, mitochondrial	ATP5B		1	6	6	6	6	3	5	5	4	4	6	3	5	5	4	4	6	3	5	5	4	4	16.4	16.4	16.4	56.559	529	529	0	26.895	16.4	8.1	13.6	13.6	10.2	10.2	56367000	14452000	9272400	11016000	7936800	6792100
P06703	P06703	9	9	9	Protein S100-A6	S100A6		1	9	9	9	9	9	8	7	7	8	9	9	8	7	7	8	9	9	8	7	7	8	47.8	47.8	47.8	10.18	90	90	0	70.853	47.8	47.8	47.8	47.8	43.3	47.8	1940500000	481200000	375540000	266770000	181060000	295180000
P06730	P06730	1	1	1	Eukaryotic translation initiation factor 4E	EIF4E		1	1	1	1	1	0	1	0	1	0	1	0	1	0	1	0	1	0	1	0	1	0	5.1	5.1	5.1	25.097	217	217	0.0084906	1.719	5.1	0	5.1	0	5.1	0	8642500	4344200	0	2437100	0	1861200
P06733;P13929	P06733	24;1	24;1	23;0	Alpha-enolase	ENO1		2	24	24	23	22	18	19	15	18	17	22	18	19	15	18	17	21	17	18	14	17	16	45.9	45.9	45.9	47.168	434	434;434	0	195.78	45.9	39.9	36.6	34.6	36.4	37.1	2414000000	594410000	526220000	477580000	247950000	286580000
P06744;CON__Q3ZBD7;Q8N196	P06744	12;4;1	12;4;1	12;4;1	Glucose-6-phosphate isomerase	GPI		3	12	12	12	10	6	7	7	7	6	10	6	7	7	7	6	10	6	7	7	7	6	31.5	31.5	31.5	63.146	558	558;557;739	0	61.137	28.9	17.6	19.5	20.3	18.8	17.7	281600000	86031000	49085000	60982000	27660000	27479000
P06748	P06748	14	14	14	Nucleophosmin	NPM1		1	14	14	14	12	9	11	8	5	7	12	9	11	8	5	7	12	9	11	8	5	7	33.7	33.7	33.7	32.575	294	294	0	44.311	28.2	30.3	30.3	25.2	18	22.8	642690000	226540000	119570000	143510000	52438000	39726000
P06753;P67936;CON__Q3SX28;P09493;P07951	P06753	10;6;5;5;5	10;6;5;5;5	10;6;5;5;5	Tropomyosin alpha-3 chain;Tropomyosin alpha-4 chain;Tropomyosin alpha-1 chain;Tropomyosin beta chain	TPM3;TPM4;TPM1;TPM2	;;;;	5	10	10	10	7	5	4	6	6	7	7	5	4	6	6	7	7	5	4	6	6	7	24.9	24.9	24.9	32.95	285	285;248;284;284;284	0	35.137	17.9	13	10.5	20	15.1	24.9	191910000	36715000	38576000	18799000	32205000	32456000
P06756	P06756	9	9	9	Integrin alpha-V;Integrin alpha-V heavy chain;Integrin alpha-V light chain	ITGAV		1	9	9	9	5	6	4	5	5	4	5	6	4	5	5	4	5	6	4	5	5	4	13.3	13.3	13.3	116.04	1048	1048	0	41.986	6.7	8	7.2	7	8.9	5.7	97666000	19140000	18642000	14966000	18021000	12893000
P06865	P06865	1	1	1	Beta-hexosaminidase subunit alpha	HEXA		1	1	1	1	0	1	1	0	0	0	0	1	1	0	0	0	0	1	1	0	0	0	2.1	2.1	2.1	60.702	529	529	0.0038278	1.8157	0	2.1	2.1	0	0	0	3270000	0	1426000	1844000	0	0
P07093	P07093	3	3	3	Glia-derived nexin	SERPINE2		1	3	3	3	2	1	1	1	1	1	2	1	1	1	1	1	2	1	1	1	1	1	8	8	8	44.002	398	398	0	4.7823	5	3	3	3	3	3	11710000	5385800	867610	966930	1876800	1334700
P07108	P07108	1	1	1	Acyl-CoA-binding protein	DBI		1	1	1	1	0	1	1	1	1	1	0	1	1	1	1	1	0	1	1	1	1	1	14.9	14.9	14.9	10.044	87	87	0	6.0257	0	14.9	14.9	14.9	14.9	14.9	17135000	0	3919200	2851500	3836000	3102400
P07195;Q6ZMR3;P07864	P07195	14;1;1	13;0;0	13;0;0	L-lactate dehydrogenase B chain	LDHB		3	14	13	13	8	9	11	9	8	8	7	8	10	8	7	7	7	8	10	8	7	7	37.7	34.1	34.1	36.638	334	334;332;332	0	45.306	28.4	25.7	32.6	26.9	27.5	29.3	564400000	134620000	101010000	104980000	73145000	82034000
P07237	P07237	9	9	9	Protein disulfide-isomerase	P4HB		1	9	9	9	6	7	7	3	4	5	6	7	7	3	4	5	6	7	7	3	4	5	20.1	20.1	20.1	57.116	508	508	0	26.343	14	14.4	15	7.1	9.4	11.4	124410000	30744000	27437000	26481000	10828000	10046000
P07305	P07305	8	8	8	Histone H1.0;Histone H1.0, N-terminally processed	H1F0		1	8	8	8	7	7	7	5	7	6	7	7	7	5	7	6	7	7	7	5	7	6	32	32	32	20.863	194	194	0	30.136	28.4	28.4	28.4	26.3	27.3	26.8	1268000000	330420000	221780000	215540000	138790000	179710000
P07339	P07339	11	11	11	Cathepsin D;Cathepsin D light chain;Cathepsin D heavy chain	CTSD		1	11	11	11	6	2	6	5	4	7	6	2	6	5	4	7	6	2	6	5	4	7	35.7	35.7	35.7	44.552	412	412	0	22.627	18.2	5.1	18.4	18.4	15.8	24.8	115370000	26354000	13545000	18564000	16494000	15340000
P07355;A6NMY6	P07355	40;28	40;28	40;28	Annexin A2;Putative annexin A2-like protein	ANXA2;ANXA2P2	;	2	40	40	40	34	32	32	26	30	29	34	32	32	26	30	29	34	32	32	26	30	29	84.1	84.1	84.1	38.604	339	339;339	0	323.31	65.2	75.2	71.4	62.8	69.6	63.4	17486000000	4365000000	3262600000	3195100000	2329900000	2341900000
P07384	P07384	3	3	3	Calpain-1 catalytic subunit	CAPN1		1	3	3	3	2	3	2	1	2	1	2	3	2	1	2	1	2	3	2	1	2	1	5.6	5.6	5.6	81.889	714	714	0	7.4365	4.2	5.6	3.9	1.4	3.1	1.4	25048000	7104900	8169900	3890900	2409200	1781900
P07437;A6NNZ2;Q9BUF5	P07437	19;7;6	4;0;0	3;0;0	Tubulin beta chain	TUBB		3	19	4	3	16	18	18	16	17	17	4	4	4	4	4	4	3	3	3	3	3	3	55.9	15.5	12.2	49.67	444	444;444;446	0	32.792	45.9	53.6	50.2	46.2	51.8	50.9	431110000	84730000	72033000	71203000	68931000	62577000
P07602	P07602	8	8	8	Prosaposin;Saposin-A;Saposin-B-Val;Saposin-B;Saposin-C;Saposin-D	PSAP		1	8	8	8	7	4	2	2	3	1	7	4	2	2	3	1	7	4	2	2	3	1	17.4	17.4	17.4	58.112	524	524	0	19.176	14.5	8	5.9	5.3	6.3	1.9	71756000	37015000	10245000	8100700	4502900	8926300
P07686	P07686	5	5	5	Beta-hexosaminidase subunit beta;Beta-hexosaminidase subunit beta chain B;Beta-hexosaminidase subunit beta chain A	HEXB		1	5	5	5	2	2	1	3	3	3	2	2	1	3	3	3	2	2	1	3	3	3	9	9	9	63.111	556	556	0	7.9858	5.2	6.7	2.9	7.2	6.7	6.7	31168000	3745200	6988300	2963300	5862000	5597300
P07737;CON__P02584	P07737	9;2	9;2	9;2	Profilin-1	PFN1		2	9	9	9	7	5	5	7	7	7	7	5	5	7	7	7	7	5	5	7	7	7	57.1	57.1	57.1	15.054	140	140;140	0	55.485	55	40.7	40.7	57.1	53.6	47.1	534530000	138590000	111310000	93595000	73405000	66167000
P07741	P07741	3	3	3	Adenine phosphoribosyltransferase	APRT		1	3	3	3	2	1	2	2	2	1	2	1	2	2	2	1	2	1	2	2	2	1	21.1	21.1	21.1	19.608	180	180	0	4.9085	15.6	8.3	15.6	15.6	13.9	8.3	28860000	6904700	4825600	3357100	4212100	5902900
P07814	P07814	19	19	19	Bifunctional glutamate/proline--tRNA ligase;Glutamate--tRNA ligase;Proline--tRNA ligase	EPRS		1	19	19	19	13	13	10	10	6	8	13	13	10	10	6	8	13	13	10	10	6	8	17.4	17.4	17.4	170.59	1512	1512	0	74.239	11.3	12.2	8.9	9.8	5.3	7.2	186950000	44758000	37801000	34260000	26705000	19557000
P07900;Q58FG0;Q58FG1	P07900	26;3;1	15;1;1	15;1;1	Heat shock protein HSP 90-alpha	HSP90AA1		3	26	15	15	20	20	23	15	13	16	10	11	13	9	7	9	10	11	13	9	7	9	39.2	26.2	26.2	84.659	732	732;334;418	0	70.555	27.9	34.2	36.7	23.5	20.5	25.7	430710000	108000000	98660000	84586000	44538000	48549000
P07910;P0DMR1;O60812;B7ZW38;B2RXH8;Q86SE5	P07910	14;7;7;7;7;1	14;7;7;7;7;1	14;7;7;7;7;1	Heterogeneous nuclear ribonucleoproteins C1/C2;Heterogeneous nuclear ribonucleoprotein C-like 4;Heterogeneous nuclear ribonucleoprotein C-like 1;Heterogeneous nuclear ribonucleoprotein C-like 3;Heterogeneous nuclear ribonucleoprotein C-like 2	HNRNPC;HNRNPCL4;HNRNPCL1;HNRNPCL3;HNRNPCL2	;;;;	6	14	14	14	10	11	9	7	7	9	10	11	9	7	7	9	10	11	9	7	7	9	40.2	40.2	40.2	33.67	306	306;293;293;293;293;291	0	36.844	29.4	32.4	31	27.1	25.8	33.3	412230000	115170000	79753000	89534000	42125000	36777000
P07942	P07942	34	34	34	Laminin subunit beta-1	LAMB1		1	34	34	34	12	14	9	23	26	24	12	14	9	23	26	24	12	14	9	23	26	24	25.6	25.6	25.6	198.04	1786	1786	0	132.68	9.6	12.7	8.5	18.7	19.4	17.4	472530000	44680000	51309000	31189000	115510000	115230000
P07947	P07947	8	8	7	Tyrosine-protein kinase Yes	YES1		1	8	8	7	5	3	3	3	5	4	5	3	3	3	5	4	4	2	2	2	4	3	21	21	18.6	60.801	543	543	0	18.811	11.4	5.5	6.6	6.6	15.8	8.7	110960000	29269000	13062000	12676000	16864000	23153000
P07954	P07954	1	1	1	Fumarate hydratase, mitochondrial	FH		1	1	1	1	1	0	0	0	0	0	1	0	0	0	0	0	1	0	0	0	0	0	3.5	3.5	3.5	54.636	510	510	0.00098814	1.9938	3.5	0	0	0	0	0	1253800	1253800	0	0	0	0
P07996	P07996	10	10	3	Thrombospondin-1	THBS1		1	10	10	3	3	3	2	6	8	9	3	3	2	6	8	9	1	1	1	3	2	3	12.1	12.1	4.7	129.38	1170	1170	0	39.223	3.9	3.9	3	7.9	9.3	11.1	155070000	5547100	5103900	5435600	38055000	44416000
P08134	P08134	6	2	2	Rho-related GTP-binding protein RhoC	RHOC		1	6	2	2	5	3	4	5	4	5	1	0	1	1	0	1	1	0	1	1	0	1	29.5	11.4	11.4	22.006	193	193	0	4.5497	23.3	17.6	23.8	24.4	18.1	24.4	19263000	3741500	0	5064000	4836200	0
P08174	P08174	6	6	6	Complement decay-accelerating factor	CD55		1	6	6	6	3	2	2	2	3	4	3	2	2	2	3	4	3	2	2	2	3	4	15.5	15.5	15.5	41.4	381	381	0	9.171	11.5	5.2	7.1	5	7.1	11.8	48069000	6004800	8637600	10198000	2168700	11534000
P08195	P08195	19	19	19	4F2 cell-surface antigen heavy chain	SLC3A2		1	19	19	19	14	15	16	10	14	15	14	15	16	10	14	15	14	15	16	10	14	15	31.9	31.9	31.9	67.993	630	630	0	135.98	26.7	30	31.9	21.9	27.3	29.5	874630000	168460000	154510000	143840000	133700000	134940000
P08238;Q58FF7;Q14568;Q58FF6	P08238	37;14;3;3	37;14;3;3	19;7;0;0	Heat shock protein HSP 90-beta	HSP90AB1		4	37	37	19	31	27	32	24	25	26	31	27	32	24	25	26	15	12	16	11	13	14	51.7	51.7	31.4	83.263	724	724;597;343;505	0	227.08	46.4	42.5	46.3	40.6	39.2	42.5	2959800000	786930000	672370000	630070000	283540000	271600000
P08621	P08621	3	3	3	U1 small nuclear ribonucleoprotein 70 kDa	SNRNP70		1	3	3	3	2	3	2	0	0	0	2	3	2	0	0	0	2	3	2	0	0	0	7.1	7.1	7.1	51.556	437	437	0	4.3979	4.6	7.1	5	0	0	0	14151000	4884800	6226300	3039600	0	0
P08708	P08708	7	7	7	40S ribosomal protein S17	RPS17		1	7	7	7	5	6	4	4	5	3	5	6	4	4	5	3	5	6	4	4	5	3	61.5	61.5	61.5	15.55	135	135	0	23.99	45.2	45.2	28.9	39.3	39.3	23	189200000	59671000	25993000	43010000	18055000	25650000
P08754;P11488;P09471;P19087;A8MTJ3	P08754	11;2;2;2;2	5;0;0;0;0	5;0;0;0;0	Guanine nucleotide-binding protein G(k) subunit alpha	GNAI3		5	11	5	5	9	8	7	9	9	9	4	2	3	4	4	4	4	2	3	4	4	4	32.2	16.4	16.4	40.532	354	354;350;354;354;354	0	21.623	30.8	24.9	22	26.8	26.8	26.8	110180000	23745000	15225000	17865000	16672000	16517000
P08758	P08758	24	24	24	Annexin A5	ANXA5		1	24	24	24	18	16	16	14	13	12	18	16	16	14	13	12	18	16	16	14	13	12	73.4	73.4	73.4	35.936	320	320	0	125.25	53.1	45.6	50	48.4	33.4	35.3	1286400000	285650000	283980000	247210000	164730000	160160000
P08865	P08865	11	11	11	40S ribosomal protein SA	RPSA		1	11	11	11	10	10	8	9	6	8	10	10	8	9	6	8	10	10	8	9	6	8	41	41	41	32.854	295	295	0	119.2	40.7	41	28.1	31.9	32.9	34.6	472120000	141750000	106310000	83753000	51936000	44589000
P08962	P08962	4	4	4	CD63 antigen	CD63		1	4	4	4	3	2	2	3	3	3	3	2	2	3	3	3	3	2	2	3	3	3	12.6	12.6	12.6	25.636	238	238	0	14.34	11.8	8.4	8.4	9.2	9.2	9.2	307560000	60611000	47977000	41761000	54904000	49228000
P09012	P09012	1	1	1	U1 small nuclear ribonucleoprotein A	SNRPA		1	1	1	1	0	1	0	0	0	0	0	1	0	0	0	0	0	1	0	0	0	0	6.7	6.7	6.7	31.279	282	282	0	4.1701	0	6.7	0	0	0	0	9031500	0	9031500	0	0	0
P09211	P09211	9	9	9	Glutathione S-transferase P	GSTP1		1	9	9	9	5	5	7	7	5	5	5	5	7	7	5	5	5	5	7	7	5	5	62.4	62.4	62.4	23.356	210	210	0	56.217	31.9	36.2	50	48.1	37.1	37.6	450480000	104390000	94393000	89646000	70902000	36756000
P09327	P09327	20	20	20	Villin-1	VIL1		1	20	20	20	11	11	12	11	9	10	11	11	12	11	9	10	11	11	12	11	9	10	33.3	33.3	33.3	92.694	827	827	0	81.95	22	20.4	20.2	18.4	16	17.5	315960000	83075000	42826000	61562000	49628000	39364000
P09429;B2RPK0	P09429	2;1	2;1	2;1	High mobility group protein B1;Putative high mobility group protein B1-like 1	HMGB1;HMGB1P1	;	2	2	2	2	1	2	1	1	1	1	1	2	1	1	1	1	1	2	1	1	1	1	13.5	13.5	13.5	24.893	215	215;211	0	6.9367	7	13.5	7	7	7	7	28298000	9458800	7048000	3821900	2796500	2934500
P09467	P09467	2	2	2	Fructose-1,6-bisphosphatase 1	FBP1		1	2	2	2	1	1	0	0	0	1	1	1	0	0	0	1	1	1	0	0	0	1	8.6	8.6	8.6	36.842	338	338	0	3.7435	4.4	4.1	0	0	0	4.4	4918500	1735900	1925100	0	0	0
P09496	P09496	3	3	3	Clathrin light chain A	CLTA		1	3	3	3	1	3	3	2	2	2	1	3	3	2	2	2	1	3	3	2	2	2	8.1	8.1	8.1	27.076	248	248	0	8.7219	3.6	8.1	8.1	8.1	8.1	8.1	31544000	0	7507300	9143800	4511900	5308400
P09525	P09525	26	26	26	Annexin A4	ANXA4		1	26	26	26	21	20	18	16	18	14	21	20	18	16	18	14	21	20	18	16	18	14	65.5	65.5	65.5	35.882	319	319	0	134.93	58.6	54.9	53.3	53.3	60.2	47	1482100000	307110000	256630000	211320000	253530000	232390000
P09543	P09543	14	14	14	2,3-cyclic-nucleotide 3-phosphodiesterase	CNP		1	14	14	14	8	7	8	9	6	8	8	7	8	9	6	8	8	7	8	9	6	8	34.9	34.9	34.9	47.578	421	421	0	71.028	23.8	20.2	26.4	23.3	18.1	19.7	165930000	41986000	23225000	30348000	28705000	19805000
P09972	P09972	7	3	3	Fructose-bisphosphate aldolase C	ALDOC		1	7	3	3	5	4	6	3	5	4	2	2	3	1	1	1	2	2	3	1	1	1	22.3	10.7	10.7	39.455	364	364	0	41.164	18.7	16.8	22.3	16.8	17.9	15.9	90339000	24713000	26020000	19499000	6828400	7927400
P0C1S8	P0C1S8	2	2	2	Wee1-like protein kinase 2	WEE2		1	2	2	2	0	0	2	0	0	0	0	0	2	0	0	0	0	0	2	0	0	0	7.2	7.2	7.2	62.924	567	567	0.0075901	1.7567	0	0	7.2	0	0	0	5894400	0	0	5894400	0	0
P0DMV9;P0DMV8	P0DMV9	33;33	28;28	16;16	Heat shock 70 kDa protein 1B;Heat shock 70 kDa protein 1A	HSPA1B;HSPA1A	;	2	33	28	16	26	29	27	30	29	30	23	25	23	26	25	26	15	15	13	14	14	14	45.1	39.5	22.2	70.051	641	641;641	0	253.05	40.1	42.9	41.3	42.1	41	42.1	2300800000	462390000	485160000	365420000	327490000	317670000
P0DN76;Q01081;Q8WU68	P0DN76	4;4;2	4;4;2	4;4;2	Splicing factor U2AF 35 kDa subunit;Splicing factor U2AF 26 kDa subunit	U2AF1;U2AF1L4	;;	3	4	4	4	2	3	2	1	4	1	2	3	2	1	4	1	2	3	2	1	4	1	14.6	14.6	14.6	27.872	240	240;240;220	0	11.696	9.2	9.2	5.8	3.3	14.6	5.8	22585000	3950800	2926100	4594700	1792300	8105500
P0DP25;P0DP24;P0DP23;P27482;P02585	P0DP25	9;9;9;1;1	9;9;9;1;1	9;9;9;1;1			;;	5	9	9	9	7	7	5	7	8	7	7	7	5	7	8	7	7	7	5	7	8	7	60.4	60.4	60.4	16.837	149	149;149;149;149;160	0	87.78	45.6	60.4	44.3	45.6	60.4	45.6	1538800000	296640000	258860000	218510000	238250000	288830000
P10301	P10301	4	2	2	Ras-related protein R-Ras	RRAS		1	4	2	2	2	2	2	3	3	2	1	0	1	2	1	1	1	0	1	2	1	1	24.8	12.4	12.4	23.48	218	218	0	5.0657	10.6	12.4	11.9	17.4	19.3	10.6	13105000	1896500	0	1939500	4410800	2412400
P10412	P10412	18	18	6	Histone H1.4	HIST1H1E		1	18	18	6	16	15	13	14	15	12	16	15	13	14	15	12	4	4	2	3	4	3	44.7	44.7	18.7	21.865	219	219	0	162.66	39.3	43.8	35.2	39.7	39.7	39.7	6655100000	1829500000	1424500000	1329300000	599160000	835360000
P10515	P10515	4	4	4	Dihydrolipoyllysine-residue acetyltransferase component of pyruvate dehydrogenase complex, mitochondrial	DLAT		1	4	4	4	4	2	1	1	1	0	4	2	1	1	1	0	4	2	1	1	1	0	6	6	6	68.996	647	647	0	6.9165	6	3.6	2.3	2.3	2.3	0	30981000	13624000	6291600	3784600	3373400	3907600
P10586;P23468;Q13332	P10586	3;1;1	3;1;1	3;1;1	Receptor-type tyrosine-protein phosphatase F	PTPRF		3	3	3	3	2	1	2	0	1	1	2	1	2	0	1	1	2	1	2	0	1	1	2.1	2.1	2.1	212.88	1907	1907;1912;1948	0	5.1565	1.6	0.8	1.4	0	0.8	0.8	10786000	3604100	2074600	3592900	0	656530
P10599	P10599	6	6	6	Thioredoxin	TXN		1	6	6	6	4	4	4	3	6	5	4	4	4	3	6	5	4	4	4	3	6	5	49.5	49.5	49.5	11.737	105	105	0	25.587	34.3	34.3	41	21.9	49.5	42.9	626460000	163200000	105500000	79838000	58696000	114400000
P10646	P10646	1	1	1	Tissue factor pathway inhibitor	TFPI		1	1	1	1	0	1	1	0	0	0	0	1	1	0	0	0	0	1	1	0	0	0	6.9	6.9	6.9	35.015	304	304	0.001938	1.8984	0	6.9	6.9	0	0	0	11568000	0	6480800	5087400	0	0
P10809	P10809	24	24	24	60 kDa heat shock protein, mitochondrial	HSPD1		1	24	24	24	19	15	14	14	12	13	19	15	14	14	12	13	19	15	14	14	12	13	38.7	38.7	38.7	61.054	573	573	0	124.1	35.6	29.5	28.8	28.4	27.9	27.2	682650000	181610000	142080000	114000000	82824000	78105000
P10909	P10909	4	4	4	Clusterin;Clusterin beta chain;Clusterin alpha chain	CLU		1	4	4	4	4	3	3	4	4	4	4	3	3	4	4	4	4	3	3	4	4	4	15.1	15.1	15.1	52.494	449	449	0	18.563	15.1	10	10	15.1	15.1	15.1	78453000	11568000	7439600	7536800	18897000	15761000
P11021	P11021	22	20	20	78 kDa glucose-regulated protein	HSPA5		1	22	20	20	16	17	14	16	14	15	15	16	12	14	12	13	15	16	12	14	12	13	38.2	37.2	37.2	72.332	654	654	0	79.848	28	30.1	23.1	26.1	24.6	24.2	473200000	109940000	98578000	74407000	64478000	64735000
P11047;Q9Y6N6	P11047	33;1	33;1	33;1	Laminin subunit gamma-1	LAMC1		2	33	33	33	17	16	17	20	23	25	17	16	17	20	23	25	17	16	17	20	23	25	27.3	27.3	27.3	177.6	1609	1609;1575	0	179.98	15.7	14.7	16.2	17.2	21.1	23.1	588190000	71283000	68176000	65828000	118090000	128360000
P11142;P54652	P11142	43;14	43;14	34;6	Heat shock cognate 71 kDa protein	HSPA8		2	43	43	34	38	37	37	32	34	34	38	37	37	32	34	34	31	30	31	26	28	28	61.6	61.6	54	70.897	646	646;639	0	277.96	55.7	57.1	61	49.8	51.9	50.2	5787300000	1207200000	1068500000	917530000	801870000	898540000
P11166	P11166	6	6	6	Solute carrier family 2, facilitated glucose transporter member 1	SLC2A1		1	6	6	6	4	4	3	4	4	4	4	4	3	4	4	4	4	4	3	4	4	4	7.9	7.9	7.9	54.083	492	492	0	55.771	7.5	7.5	7.1	5.9	7.1	7.1	262970000	48166000	40052000	34251000	52247000	40938000
P11216;P11217;P06737	P11216	33;5;3	33;5;3	33;5;3	Glycogen phosphorylase, brain form	PYGB		3	33	33	33	21	25	23	13	13	14	21	25	23	13	13	14	21	25	23	13	13	14	41.9	41.9	41.9	96.695	843	843;842;847	0	121.54	29.3	34.9	30	20.9	21.2	21.9	668390000	181040000	162760000	133330000	59513000	59083000
P11233	P11233	7	7	5	Ras-related protein Ral-A	RALA		1	7	7	5	7	6	5	5	5	6	7	6	5	5	5	6	5	4	3	3	3	4	34	34	22.8	23.567	206	206	0	33.837	34	33	26.2	26.2	29.6	29.6	316690000	91075000	56384000	37505000	43102000	44039000
P11234	P11234	7	5	5	Ras-related protein Ral-B	RALB		1	7	5	5	5	3	3	7	6	4	3	1	1	5	4	2	3	1	1	5	4	2	36.4	25.2	25.2	23.408	206	206	0	65.245	31.1	15.5	15.5	36.4	36.4	26.7	99749000	16032000	11620000	13183000	20960000	26609000
P11279	P11279	4	4	4	Lysosome-associated membrane glycoprotein 1	LAMP1		1	4	4	4	3	3	4	2	2	3	3	3	4	2	2	3	3	3	4	2	2	3	9.8	9.8	9.8	44.882	417	417	0	14.425	9.8	9.8	9.8	6.5	7.7	7.7	282790000	81930000	59730000	72550000	18478000	20953000
P11387	P11387	12	12	12	DNA topoisomerase 1	TOP1		1	12	12	12	12	9	7	2	6	3	12	9	7	2	6	3	12	9	7	2	6	3	20.5	20.5	20.5	90.725	765	765	0	59.341	20.5	16.9	13.2	4.7	10.7	5	226400000	72239000	59548000	51121000	13653000	17493000
P11388;Q02880	P11388	2;1	2;1	2;1	DNA topoisomerase 2-alpha;DNA topoisomerase 2-beta	TOP2A;TOP2B	;	2	2	2	2	2	2	2	1	1	0	2	2	2	1	1	0	2	2	2	1	1	0	1.6	1.6	1.6	174.38	1531	1531;1626	0	9.5933	1.6	1.6	1.6	0.8	0.8	0	22264000	6369700	7439300	5941800	0	2513700
P11413	P11413	9	9	9	Glucose-6-phosphate 1-dehydrogenase	G6PD		1	9	9	9	7	3	3	4	3	5	7	3	3	4	3	5	7	3	3	4	3	5	21	21	21	59.256	515	515	0	33.068	17.7	7.6	9.1	9.3	8	11.1	123730000	41064000	16141000	17257000	16333000	17735000
P11586	P11586	6	6	6	C-1-tetrahydrofolate synthase, cytoplasmic;Methylenetetrahydrofolate dehydrogenase;Methenyltetrahydrofolate cyclohydrolase;Formyltetrahydrofolate synthetase;C-1-tetrahydrofolate synthase, cytoplasmic, N-terminally processed	MTHFD1		1	6	6	6	6	5	4	3	2	5	6	5	4	3	2	5	6	5	4	3	2	5	8.4	8.4	8.4	101.56	935	935	0	13.447	8.4	7.2	5.5	4.2	3	7.1	60209000	17209000	15095000	11033000	5762600	3142300
P11766	P11766	3	3	3	Alcohol dehydrogenase class-3	ADH5		1	3	3	3	3	2	1	1	1	2	3	2	1	1	1	2	3	2	1	1	1	2	15.8	15.8	15.8	39.724	374	374	0	10.905	15.8	10.4	5.3	4.5	4.5	10.4	33234000	9833800	9226700	1633900	3688300	3264900
P11940;Q9H361;Q4VXU2;Q96DU9	P11940	19;9;4;2	19;9;4;2	13;7;3;2	Polyadenylate-binding protein 1	PABPC1		4	19	19	13	16	12	14	11	9	10	16	12	14	11	9	10	10	9	9	7	7	7	29.2	29.2	18.1	70.67	636	636;631;614;382	0	69.699	25	23	25	19.8	16.4	19.2	470930000	127150000	109460000	101280000	54703000	33227000
P12004	P12004	3	3	3	Proliferating cell nuclear antigen	PCNA		1	3	3	3	3	2	1	1	1	1	3	2	1	1	1	1	3	2	1	1	1	1	17.2	17.2	17.2	28.768	261	261	0	11.532	17.2	9.2	5.7	5.7	5.7	5.7	37810000	20187000	8474000	4567400	2579300	1074500
P12259	P12259	4	1	1	Coagulation factor V;Coagulation factor V heavy chain;Coagulation factor V light chain	F5		1	4	1	1	1	1	1	1	3	2	1	1	0	0	1	0	1	1	0	0	1	0	2.4	0.8	0.8	251.7	2224	2224	0	2.6241	0.8	0.8	0.4	0.4	1.6	1.2	5510400	1698700	1845300	0	0	1966400
P12277	P12277	4	4	4	Creatine kinase B-type	CKB		1	4	4	4	3	4	3	3	1	1	3	4	3	3	1	1	3	4	3	3	1	1	12.3	12.3	12.3	42.644	381	381	0	12.581	9.7	12.3	10.2	10.2	3.4	4.2	67394000	19188000	18114000	13412000	10112000	4091000
P12429	P12429	14	14	14	Annexin A3	ANXA3		1	14	14	14	12	10	10	10	9	8	12	10	10	10	9	8	12	10	10	10	9	8	45.8	45.8	45.8	36.375	323	323	0	50.937	40.9	37.5	33.7	36.8	32.8	31.6	347790000	102110000	68723000	54078000	46441000	36209000
P12644	P12644	2	2	2	Bone morphogenetic protein 4	BMP4		1	2	2	2	0	0	0	2	1	2	0	0	0	2	1	2	0	0	0	2	1	2	5.9	5.9	5.9	46.554	408	408	0	4.5731	0	0	0	5.9	3.2	5.9	12021000	0	0	0	4744700	1779900
P12814	P12814	18	4	4	Alpha-actinin-1	ACTN1		1	18	4	4	9	11	9	13	11	12	1	1	2	4	2	3	1	1	2	4	2	3	21.6	6.1	6.1	103.06	892	892	0	10.072	10.5	13.7	12.2	18.3	14.9	15.8	32763000	5696600	3039200	6521900	6167500	4258600
P12830	P12830	11	11	11	Cadherin-1;E-Cad/CTF1;E-Cad/CTF2;E-Cad/CTF3	CDH1		1	11	11	11	7	10	7	7	6	7	7	10	7	7	6	7	7	10	7	7	6	7	16.7	16.7	16.7	97.455	882	882	0	54.525	10.9	14.5	9.5	9.3	9.2	10.2	297980000	50916000	70289000	59797000	54458000	22676000
P12931;Q9H3Y6;P42685;P08581	P12931	7;1;1;1	6;1;1;1	5;0;0;0	Proto-oncogene tyrosine-protein kinase Src	SRC		4	7	6	5	4	6	5	4	5	5	3	5	4	3	4	4	2	4	3	2	3	3	17	14.6	13.1	59.834	536	536;488;505;1390	0	23.911	10.1	15.5	12.7	8	12.7	12.7	91210000	16699000	17351000	13498000	5928000	13759000
P12956	P12956	10	10	10	X-ray repair cross-complementing protein 6	XRCC6		1	10	10	10	8	7	5	1	2	2	8	7	5	1	2	2	8	7	5	1	2	2	20.2	20.2	20.2	69.842	609	609	0	38.5	15.1	16.3	11.7	2.8	4.3	5.1	74920000	22259000	24280000	17119000	1192700	5661400
P13010	P13010	6	6	6	X-ray repair cross-complementing protein 5	XRCC5		1	6	6	6	6	3	4	2	1	3	6	3	4	2	1	3	6	3	4	2	1	3	10.8	10.8	10.8	82.704	732	732	0	17.176	10.8	6.1	7.7	2.6	1.4	4.2	47152000	20962000	8140700	9426800	3191800	1708100
P13489	P13489	6	6	6	Ribonuclease inhibitor	RNH1		1	6	6	6	3	5	2	1	2	1	3	5	2	1	2	1	3	5	2	1	2	1	20	20	20	49.973	461	461	0	17.823	8.7	18	6.7	2.6	4.6	2.6	36727000	9366500	12059000	5324500	2209300	5034500
P13639	P13639	18	18	17	Elongation factor 2	EEF2		1	18	18	17	14	13	12	8	9	11	14	13	12	8	9	11	13	12	12	8	9	11	25.3	25.3	24.1	95.337	858	858	0	80.001	20.2	16.1	17.7	12	14.1	13.8	384740000	114280000	88861000	63081000	35020000	34347000
P13667	P13667	5	5	5	Protein disulfide-isomerase A4	PDIA4		1	5	5	5	4	3	2	1	1	2	4	3	2	1	1	2	4	3	2	1	1	2	9.1	9.1	9.1	72.932	645	645	0	24.273	7	7	5.3	3.4	3.4	5.6	37763000	13177000	10960000	5605300	1684800	2894600
P13688	P13688	3	3	3	Carcinoembryonic antigen-related cell adhesion molecule 1	CEACAM1		1	3	3	3	3	2	2	2	3	2	3	2	2	2	3	2	3	2	2	2	3	2	10.3	10.3	10.3	57.56	526	526	0	8.0875	10.3	6.3	6.3	7.2	10.3	6.3	56520000	12028000	10400000	10350000	6713100	9534500
P13693;Q56UQ5	P13693	4;2	4;2	4;2	Translationally-controlled tumor protein;TPT1-like protein	TPT1	;	2	4	4	4	1	1	1	2	2	1	1	1	1	2	2	1	1	1	1	2	2	1	25.6	25.6	25.6	19.595	172	172;140	0	5.7747	8.1	8.1	4.1	14	15.7	8.1	13131000	1750000	1352800	1704900	4199000	2644300
P13798	P13798	3	3	3	Acylamino-acid-releasing enzyme	APEH		1	3	3	3	2	2	1	0	0	1	2	2	1	0	0	1	2	2	1	0	0	1	5.1	5.1	5.1	81.224	732	732	0	6.3334	3.4	3.3	1.6	0	0	1.8	7596500	3827900	1644300	990610	0	0
P13804	P13804	2	2	2	Electron transfer flavoprotein subunit alpha, mitochondrial	ETFA		1	2	2	2	0	1	1	0	0	0	0	1	1	0	0	0	0	1	1	0	0	0	8.7	8.7	8.7	35.079	333	333	0.0010163	2.1661	0	3.9	4.8	0	0	0	3671200	0	1635500	2035700	0	0
P13987	P13987	5	5	5	CD59 glycoprotein	CD59		1	5	5	5	5	5	4	4	3	4	5	5	4	4	3	4	5	5	4	4	3	4	25.8	25.8	25.8	14.177	128	128	0	15.759	25.8	25.8	25.8	25	23.4	25	369910000	107920000	82562000	74773000	35170000	36790000
P14174	P14174	1	1	1	Macrophage migration inhibitory factor	MIF		1	1	1	1	1	0	0	1	0	1	1	0	0	1	0	1	1	0	0	1	0	1	7.8	7.8	7.8	12.476	115	115	0	2.9033	7.8	0	0	7.8	0	7.8	40897000	19844000	0	0	21054000	0
P14314	P14314	2	2	2	Glucosidase 2 subunit beta	PRKCSH		1	2	2	2	2	0	1	1	1	1	2	0	1	1	1	1	2	0	1	1	1	1	4.5	4.5	4.5	59.425	528	528	0	3.277	4.5	0	2.5	2.5	2.1	2.5	11669000	3401600	0	2597600	1979100	1763200
P14550	P14550	4	4	4	Alcohol dehydrogenase [NADP(+)]	AKR1A1		1	4	4	4	4	3	2	1	2	1	4	3	2	1	2	1	4	3	2	1	2	1	18.2	18.2	18.2	36.573	325	325	0	12.375	18.2	15.1	8.3	3.7	8.3	3.7	50421000	17987000	13269000	7946900	5232500	1420300
P14618;P30613	P14618	33;1	33;1	33;1	Pyruvate kinase PKM	PKM		2	33	33	33	30	26	23	24	23	25	30	26	23	24	23	25	30	26	23	24	23	25	65	65	65	57.936	531	531;574	0	284.83	57.6	52.5	49.3	56.9	50.8	53.1	2668700000	669490000	543140000	476720000	342360000	318690000
P14625;Q58FF3	P14625	17;2	15;2	15;2	Endoplasmin	HSP90B1		2	17	15	15	10	9	9	5	7	5	8	7	7	3	5	3	8	7	7	3	5	3	22	20.3	20.3	92.468	803	803;399	0	38.597	12.7	9.3	12	6.2	8.7	6	123900000	37525000	28946000	24397000	9815700	14104000
P14866	P14866	3	3	3	Heterogeneous nuclear ribonucleoprotein L	HNRNPL		1	3	3	3	2	3	2	1	1	1	2	3	2	1	1	1	2	3	2	1	1	1	6.6	6.6	6.6	64.132	589	589	0	4.6502	3.9	6.6	3.9	2.2	2.2	2.2	29856000	6810500	9911000	7314100	2166900	1819600
P14868	P14868	17	17	17	Aspartate--tRNA ligase, cytoplasmic	DARS		1	17	17	17	8	9	7	7	8	6	8	9	7	7	8	6	8	9	7	7	8	6	39.7	39.7	39.7	57.136	501	501	0	49.169	18.2	24.8	19.6	15.2	21	13.6	135410000	30475000	29820000	24399000	20297000	20307000
P14923	P14923	25	25	21	Junction plakoglobin	JUP		1	25	25	21	14	17	19	16	14	15	14	17	19	16	14	15	13	14	17	15	13	14	43.6	43.6	37.3	81.744	745	745	0	118.52	25.6	28.2	34.2	28.1	24.4	26.7	668440000	152350000	120120000	112670000	106420000	83282000
P15151	P15151	3	3	3	Poliovirus receptor	PVR		1	3	3	3	0	1	1	1	0	2	0	1	1	1	0	2	0	1	1	1	0	2	9.4	9.4	9.4	45.302	417	417	0	4.8303	0	2.9	3.1	3.1	0	6.5	16635000	0	1676100	4256800	4391100	0
P15170;Q8IYD1	P15170	2;1	2;1	2;1	Eukaryotic peptide chain release factor GTP-binding subunit ERF3A;Eukaryotic peptide chain release factor GTP-binding subunit ERF3B	GSPT1;GSPT2	;	2	2	2	2	1	2	0	0	0	0	1	2	0	0	0	0	1	2	0	0	0	0	6.4	6.4	6.4	55.755	499	499;628	0.0083721	1.6515	1.6	6.4	0	0	0	0	5091900	2026600	3065300	0	0	0
P15311	P15311	30	21	20	Ezrin	EZR		1	30	21	20	19	16	18	19	20	18	13	9	13	14	14	12	12	8	12	13	13	11	47.3	36.5	35.2	69.412	586	586	0	103.28	35.5	26.6	31.4	31.2	30.2	29	721620000	141800000	94598000	98160000	100250000	145770000
P15529	P15529	2	2	2	Membrane cofactor protein	CD46		1	2	2	2	1	1	1	1	0	1	1	1	1	1	0	1	1	1	1	1	0	1	5.9	5.9	5.9	43.747	392	392	0	3.2881	3.8	2	3.8	3.8	0	3.8	26065000	11048000	3618800	4434600	4023700	0
P15531	P15531	6	2	2	Nucleoside diphosphate kinase A	NME1		1	6	2	2	5	4	4	5	5	4	1	0	0	1	1	0	1	0	0	1	1	0	48.7	17.8	17.8	17.149	152	152	0.0085308	1.7516	37.5	30.9	30.9	42.1	42.1	30.9	6555000	3283700	0	0	1101900	2169400
P15559	P15559	10	10	10	NAD(P)H dehydrogenase [quinone] 1	NQO1		1	10	10	10	8	6	7	8	5	8	8	6	7	8	5	8	8	6	7	8	5	8	31.8	31.8	31.8	30.867	274	274	0	46.945	25.9	21.5	25.5	24.5	21.2	28.5	208710000	47217000	45410000	38221000	22425000	24005000
P15880	P15880	11	11	11	40S ribosomal protein S2	RPS2		1	11	11	11	10	7	9	8	9	7	10	7	9	8	9	7	10	7	9	8	9	7	36.9	36.9	36.9	31.324	293	293	0	28.578	34.5	25.9	30.7	28.3	30.4	25.6	777860000	253510000	123370000	152580000	55352000	106570000
P16070	P16070	11	11	11	CD44 antigen	CD44		1	11	11	11	6	9	9	9	11	8	6	9	9	9	11	8	6	9	9	9	11	8	16.4	16.4	16.4	81.537	742	742	0	44.245	11.3	13.9	13.9	11.9	16.4	12	504750000	69229000	69498000	70925000	87184000	116790000
P16104	P16104	5	1	1	Histone H2AX	H2AFX		1	5	1	1	5	4	5	4	3	4	1	1	1	0	0	0	1	1	1	0	0	0	22.4	6.3	6.3	15.144	143	143	0.0084666	1.7135	22.4	22.4	22.4	16.1	16.1	16.1	277950000	117790000	81020000	79142000	0	0
P16144	P16144	50	50	50	Integrin beta-4	ITGB4		1	50	50	50	29	30	30	29	33	35	29	30	30	29	33	35	29	30	30	29	33	35	32.9	32.9	32.9	202.16	1822	1822	0	195.57	20.7	22.4	21.8	21.5	23.4	24.9	1112900000	206580000	196850000	170870000	159710000	185980000
P16152;O75828	P16152	3;2	3;2	3;2	Carbonyl reductase [NADPH] 1;Carbonyl reductase [NADPH] 3	CBR1;CBR3	;	2	3	3	3	2	2	2	0	0	0	2	2	2	0	0	0	2	2	2	0	0	0	15.5	15.5	15.5	30.375	277	277;277	0	28.254	10.8	10.5	9.7	0	0	0	10917000	4834700	2086500	3996000	0	0
P16188;P16189	P16188	11;7	1;1	0;0	HLA class I histocompatibility antigen, A-30 alpha chain;HLA class I histocompatibility antigen, A-31 alpha chain	HLA-A	;	2	11	1	0	7	8	6	6	5	7	1	1	1	1	1	1	0	0	0	0	0	0	40.3	3.3	0	40.904	365	365;365	0	7.2239	30.7	28.5	19.2	22.5	21.1	29.6	117030000	20388000	18848000	18225000	19323000	19196000
P16278	P16278	1	1	1	Beta-galactosidase	GLB1		1	1	1	1	0	1	0	1	0	1	0	1	0	1	0	1	0	1	0	1	0	1	2.1	2.1	2.1	76.074	677	677	0.0084112	1.6721	0	2.1	0	2.1	0	2.1	2429600	0	931140	0	768050	0
P16401	P16401	17	15	15	Histone H1.5	HIST1H1B		1	17	15	15	14	15	16	15	12	16	12	13	14	13	10	14	12	13	14	13	10	14	43.4	36.3	36.3	22.58	226	226	0	110.55	38.1	42	42.5	41.2	39.8	42.9	4883500000	1124100000	1042200000	1012200000	526990000	625820000
P16402	P16402	15	3	3	Histone H1.3	HIST1H1D		1	15	3	3	15	14	14	14	14	12	3	3	3	3	3	3	3	3	3	3	3	3	38.9	13.1	13.1	22.35	221	221	0	36.825	38.9	38	38.5	38	38	38	538820000	129040000	108170000	99209000	63223000	76648000
P16403;Q02539;P22492	P16403	16;6;5	5;0;0	5;0;0	Histone H1.2	HIST1H1C		3	16	5	5	16	15	16	15	15	13	5	5	5	5	5	5	5	5	5	5	5	5	41.8	15.5	15.5	21.364	213	213;215;207	0	63.967	41.8	40.8	41.8	40.8	40.8	40.8	1914400000	474100000	436560000	332140000	199670000	175950000
P16422	P16422	13	13	13	Epithelial cell adhesion molecule	EPCAM		1	13	13	13	11	9	10	12	10	11	11	9	10	12	10	11	11	9	10	12	10	11	36.6	36.6	36.6	34.932	314	314	0	147.11	33.4	29.9	29.9	35.4	33.1	33.1	3781100000	836470000	603680000	639180000	547770000	544110000
P16615;O14983;Q93084	P16615	4;1;1	4;1;1	4;1;1	Sarcoplasmic/endoplasmic reticulum calcium ATPase 2	ATP2A2		3	4	4	4	2	2	2	2	1	2	2	2	2	2	1	2	2	2	2	2	1	2	5.2	5.2	5.2	114.76	1042	1042;1001;1043	0	12.984	2.5	2.9	2.7	2.9	1.4	2.9	27885000	5714200	7581300	5324500	3638100	2274900
P17066;P48741	P17066	12;6	1;1	1;1	Heat shock 70 kDa protein 6;Putative heat shock 70 kDa protein 7	HSPA6;HSPA7	;	2	12	1	1	10	10	9	10	10	10	1	1	1	1	1	1	1	1	1	1	1	1	16.3	1.7	1.7	71.027	643	643;367	0	75.376	15.2	14.6	14.6	15.7	15.7	15.7	465760000	0	106840000	143040000	0	115770000
P17096	P17096	5	5	5	High mobility group protein HMG-I/HMG-Y	HMGA1		1	5	5	5	5	4	5	2	1	3	5	4	5	2	1	3	5	4	5	2	1	3	51.4	51.4	51.4	11.676	107	107	0	270.57	51.4	41.1	51.4	41.1	23.4	41.1	531460000	155310000	165460000	188010000	8843900	2715300
P17174	P17174	2	2	2	Aspartate aminotransferase, cytoplasmic	GOT1		1	2	2	2	1	1	0	0	0	0	1	1	0	0	0	0	1	1	0	0	0	0	9.4	9.4	9.4	46.247	413	413	0	3.5052	4.8	4.6	0	0	0	0	4321500	2134400	2187100	0	0	0
P17301	P17301	10	10	10	Integrin alpha-2	ITGA2		1	10	10	10	7	7	3	4	4	4	7	7	3	4	4	4	7	7	3	4	4	4	11.4	11.4	11.4	129.29	1181	1181	0	24.045	7.4	9.1	4.4	5.1	5	5.1	135630000	38979000	29013000	13621000	18308000	19278000
P17812	P17812	2	2	2	CTP synthase 1	CTPS1		1	2	2	2	1	1	0	0	0	0	1	1	0	0	0	0	1	1	0	0	0	0	4.1	4.1	4.1	66.69	591	591	0	5.8236	2	2	0	0	0	0	1525800	1525800	0	0	0	0
P17844	P17844	11	11	9	Probable ATP-dependent RNA helicase DDX5	DDX5		1	11	11	9	7	5	7	5	4	8	7	5	7	5	4	8	5	4	6	4	3	7	19.1	19.1	15.1	69.147	614	614	0	25.924	12.7	8.8	11.4	8.3	5.9	14.2	70108000	17956000	9899200	13671000	9462000	6126700
P17931	P17931	4	4	4	Galectin-3	LGALS3		1	4	4	4	3	1	2	1	2	1	3	1	2	1	2	1	3	1	2	1	2	1	14.4	14.4	14.4	26.152	250	250	0	5.1332	11.6	4.4	8.8	4.4	7.2	4.4	40019000	12329000	7275700	11298000	0	5792800
P17980	P17980	5	5	5	26S protease regulatory subunit 6A	PSMC3		1	5	5	5	0	2	1	2	3	3	0	2	1	2	3	3	0	2	1	2	3	3	18.9	18.9	18.9	49.203	439	439	0	11.217	0	8	3.6	8.2	10.9	10.9	19347000	0	2963600	2345200	3707000	5375600
P17987	P17987	20	20	20	T-complex protein 1 subunit alpha	TCP1		1	20	20	20	10	12	13	10	12	11	10	12	13	10	12	11	10	12	13	10	12	11	43.3	43.3	43.3	60.343	556	556	0	57.87	23.2	23.7	30.8	24.6	27.2	25.5	453730000	97206000	63356000	85453000	69109000	73566000
P18077	P18077	9	9	9	60S ribosomal protein L35a	RPL35A		1	9	9	9	8	6	7	6	7	8	8	6	7	6	7	8	8	6	7	6	7	8	56.4	56.4	56.4	12.538	110	110	0	24.429	50	40	48.2	48.2	48.2	54.5	485980000	134340000	88954000	88972000	42654000	60513000
P18084	P18084	3	3	3	Integrin beta-5	ITGB5		1	3	3	3	2	3	1	1	1	0	2	3	1	1	1	0	2	3	1	1	1	0	5.6	5.6	5.6	88.053	799	799	0	6.7877	3.8	5.6	2.5	1.9	1.3	0	16848000	4267200	6350900	2343500	1557100	2329100
P18124	P18124	16	16	16	60S ribosomal protein L7	RPL7		1	16	16	16	13	12	10	7	9	9	13	12	10	7	9	9	13	12	10	7	9	9	44	44	44	29.225	248	248	0	116.92	35.5	37.9	39.5	28.6	33.9	33.5	985970000	267470000	199980000	264190000	68825000	71053000
P18621	P18621	8	8	8	60S ribosomal protein L17	RPL17		1	8	8	8	7	7	7	4	6	4	7	7	7	4	6	4	7	7	7	4	6	4	39.7	39.7	39.7	21.397	184	184	0	35.861	38	39.7	39.1	28.8	34.8	23.9	480940000	129710000	108980000	104580000	47638000	38198000
P18669;P15259;Q8N0Y7	P18669	5;2;2	5;2;2	5;2;2	Phosphoglycerate mutase 1	PGAM1		3	5	5	5	5	3	3	2	2	2	5	3	3	2	2	2	5	3	3	2	2	2	29.5	29.5	29.5	28.804	254	254;253;254	0	18.307	29.5	20.1	18.1	13.8	13.8	13.8	127200000	35554000	25939000	24491000	13879000	14106000
P18827	P18827	4	4	4	Syndecan-1	SDC1		1	4	4	4	3	4	3	3	4	4	3	4	3	3	4	4	3	4	3	3	4	4	15.5	15.5	15.5	32.461	310	310	0	35.733	11.9	15.5	11.9	11.9	15.5	15.5	145810000	33077000	25327000	22665000	22976000	18255000
P19075	P19075	8	8	8	Tetraspanin-8	TSPAN8		1	8	8	8	6	5	7	4	5	3	6	5	7	4	5	3	6	5	7	4	5	3	39.2	39.2	39.2	26.044	237	237	0	42.1	34.6	23.6	33.8	18.6	29.1	13.1	662320000	188090000	126550000	153170000	82285000	16580000
P19105;O14950;P24844	P19105	5;5;3	5;5;3	5;5;3	Myosin regulatory light chain 12A;Myosin regulatory light chain 12B;Myosin regulatory light polypeptide 9	MYL12A;MYL12B;MYL9	;;	3	5	5	5	2	3	2	2	4	2	2	3	2	2	4	2	2	3	2	2	4	2	39.8	39.8	39.8	19.794	171	171;172;172	0	17.377	12.3	22.8	12.3	17	33.3	17	68053000	8342300	16350000	8437700	9934600	15762000
P19256	P19256	2	2	2	Lymphocyte function-associated antigen 3	CD58		1	2	2	2	1	2	1	0	0	0	1	2	1	0	0	0	1	2	1	0	0	0	4.8	4.8	4.8	28.147	250	250	0	3.5571	4	4.8	4	0	0	0	10205000	2822200	5013400	2369100	0	0
P19338	P19338	14	14	14	Nucleolin	NCL		1	14	14	14	10	13	9	6	7	8	10	13	9	6	7	8	10	13	9	6	7	8	21.7	21.7	21.7	76.613	710	710	0	73.743	17.6	20.6	14.5	9.4	11.3	12.8	206220000	61938000	57851000	44182000	13891000	12676000
P19801	P19801	4	4	4	Amiloride-sensitive amine oxidase [copper-containing]	AOC1		1	4	4	4	1	3	2	2	3	2	1	3	2	2	3	2	1	3	2	2	3	2	7.2	7.2	7.2	85.377	751	751	0	15.232	2	5.7	4	4	5.5	4	45309000	3043100	11155000	8158000	6815900	9669500
P20020;P23634	P20020	6;2	6;2	5;1	Plasma membrane calcium-transporting ATPase 1	ATP2B1		2	6	6	5	2	3	3	2	3	3	2	3	3	2	3	3	2	2	2	2	3	3	7	7	5.6	138.75	1258	1258;1241	0	12.119	2.2	3.7	3.7	2.5	3.9	3.4	41645000	4554100	9561700	10255000	4341000	7062300
P20042	P20042	1	1	1	Eukaryotic translation initiation factor 2 subunit 2	EIF2S2		1	1	1	1	1	1	0	0	0	0	1	1	0	0	0	0	1	1	0	0	0	0	3	3	3	38.388	333	333	0.001007	2.1281	3	3	0	0	0	0	3331300	1633500	1697800	0	0	0
P20073	P20073	5	5	5	Annexin A7	ANXA7		1	5	5	5	3	4	2	2	1	3	3	4	2	2	1	3	3	4	2	2	1	3	14.1	14.1	14.1	52.739	488	488	0	19.436	8.8	10.9	4.5	5.5	2.3	8.6	46280000	13861000	13309000	6070300	5022500	2485100
P20618	P20618	7	7	7	Proteasome subunit beta type-1	PSMB1		1	7	7	7	5	5	4	3	1	1	5	5	4	3	1	1	5	5	4	3	1	1	39	39	39	26.489	241	241	0	27.39	29.5	30.7	23.7	16.6	5.8	5.8	94003000	31140000	27850000	19515000	8752900	4094000
P20671	P20671	7	1	0	Histone H2A type 1-D	HIST1H2AD		1	7	1	0	7	6	7	7	6	6	1	1	1	1	1	0	0	0	0	0	0	0	26.2	5.4	0	14.107	130	130	0.0010267	2.2882	26.2	26.2	26.2	26.2	26.2	20.8	139960000	20073000	27868000	29835000	23583000	38602000
P20700	P20700	3	2	2	Lamin-B1	LMNB1		1	3	2	2	1	2	1	0	1	0	1	1	1	0	0	0	1	1	1	0	0	0	5.3	3.9	3.9	66.408	586	586	0	2.7907	1.7	3.6	2.2	0	1.4	0	7501600	2732000	2486100	2283400	0	0
P21333	P21333	17	16	16	Filamin-A	FLNA		1	17	16	16	6	3	6	3	8	9	6	3	6	3	7	9	6	3	6	3	7	9	9.7	9.4	9.4	280.74	2647	2647	0	31.69	3.6	1.7	3.5	1.7	4.7	5.4	76799000	15495000	8143600	13642000	7050700	11427000
P21589	P21589	7	7	7	5-nucleotidase	NT5E		1	7	7	7	4	3	4	2	2	3	4	3	4	2	2	3	4	3	4	2	2	3	15.3	15.3	15.3	63.367	574	574	0	16.493	8.4	6.1	9.9	5.1	5.1	6.8	77018000	17379000	14332000	18075000	8057800	7444500
P21741	P21741	8	8	8	Midkine	MDK		1	8	8	8	8	6	6	6	4	5	8	6	6	6	4	5	8	6	6	6	4	5	50.3	50.3	50.3	15.585	143	143	0	34.168	50.3	37.8	37.8	39.9	32.9	32.9	420270000	147990000	77141000	75345000	49648000	35476000
P21796	P21796	4	4	4	Voltage-dependent anion-selective channel protein 1	VDAC1		1	4	4	4	1	1	4	0	1	1	1	1	4	0	1	1	1	1	4	0	1	1	18.7	18.7	18.7	30.772	283	283	0	3.9942	4.2	4.2	18.7	0	4.2	4.2	15234000	2945000	2741400	6008500	0	1729700
P21810	P21810	3	3	3	Biglycan	BGN		1	3	3	3	0	1	0	1	2	3	0	1	0	1	2	3	0	1	0	1	2	3	9.5	9.5	9.5	41.654	368	368	0	4.5012	0	3	0	3	5.7	9.5	7589900	0	751630	0	1043000	2332900
P21926	P21926	7	7	7	CD9 antigen	CD9		1	7	7	7	7	6	4	6	7	7	7	6	4	6	7	7	7	6	4	6	7	7	31.1	31.1	31.1	25.416	228	228	0	180.33	31.1	25.4	14.5	31.1	31.1	31.1	2816800000	633590000	490610000	430070000	497010000	332250000
P21964	P21964	4	4	4	Catechol O-methyltransferase	COMT		1	4	4	4	4	4	4	2	3	3	4	4	4	2	3	3	4	4	4	2	3	3	20.3	20.3	20.3	30.037	271	271	0	16.155	20.3	20.3	20.3	14.8	14.8	14.8	66311000	17849000	16194000	13751000	5681400	5717600
P22059	P22059	2	2	2	Oxysterol-binding protein 1	OSBP		1	2	2	2	0	1	1	0	0	0	0	1	1	0	0	0	0	1	1	0	0	0	3.7	3.7	3.7	89.42	807	807	0.000998	2.0732	0	1.6	2.1	0	0	0	2831100	0	1815300	1015800	0	0
P22087	P22087	6	6	6	rRNA 2-O-methyltransferase fibrillarin	FBL		1	6	6	6	6	5	6	3	1	3	6	5	6	3	1	3	6	5	6	3	1	3	27.4	27.4	27.4	33.784	321	321	0	33.861	27.4	21.5	27.4	11.2	2.8	11.2	138080000	50663000	26628000	36683000	8398000	5987500
P22102	P22102	5	5	5	Trifunctional purine biosynthetic protein adenosine-3;Phosphoribosylamine--glycine ligase;Phosphoribosylformylglycinamidine cyclo-ligase;Phosphoribosylglycinamide formyltransferase	GART		1	5	5	5	4	1	2	0	1	0	4	1	2	0	1	0	4	1	2	0	1	0	8.5	8.5	8.5	107.77	1010	1010	0	11.091	6.9	2.1	3.5	0	1.6	0	15732000	7532800	2525400	4386200	0	1287200
P22234	P22234	12	12	12	Multifunctional protein ADE2;Phosphoribosylaminoimidazole-succinocarboxamide synthase;Phosphoribosylaminoimidazole carboxylase	PAICS		1	12	12	12	7	6	8	5	5	4	7	6	8	5	5	4	7	6	8	5	5	4	33.4	33.4	33.4	47.079	425	425	0	32.464	17.6	15.8	24.7	14.6	13.9	12	162320000	40672000	33344000	35680000	22173000	15336000
P22314	P22314	17	17	17	Ubiquitin-like modifier-activating enzyme 1	UBA1		1	17	17	17	14	12	14	6	8	7	14	12	14	6	8	7	14	12	14	6	8	7	23.4	23.4	23.4	117.85	1058	1058	0	91.75	18	17.5	20.9	8.7	12.7	10	326870000	101260000	84569000	88042000	13587000	19501000
P22392;O60361	P22392	8;5	8;5	4;3	Nucleoside diphosphate kinase B;Putative nucleoside diphosphate kinase	NME2;NME2P1	;	2	8	8	4	6	6	5	6	5	7	6	6	5	6	5	7	2	2	1	2	1	3	54.6	54.6	23.7	17.298	152	152;137	0	26.985	43.4	44.1	37.5	42.1	37.5	48.7	279510000	73352000	56554000	39923000	42037000	29526000
P22626	P22626	8	8	7	Heterogeneous nuclear ribonucleoproteins A2/B1	HNRNPA2B1		1	8	8	7	4	4	3	2	4	2	4	4	3	2	4	2	4	4	3	2	3	2	22.7	22.7	22.7	37.429	353	353	0	18.476	13.9	13	11.6	6.8	12.5	8.2	76576000	32413000	19904000	5256600	5586900	9613600
P23229	P23229	35	35	35	Integrin alpha-6;Integrin alpha-6 heavy chain;Integrin alpha-6 light chain;Processed integrin alpha-6	ITGA6		1	35	35	35	29	23	25	25	21	23	29	23	25	25	21	23	29	23	25	25	21	23	37.4	37.4	37.4	126.6	1130	1130	0	189.12	30.8	26.7	27.1	28.8	24.3	26.9	1281700000	290270000	195500000	187620000	203430000	188760000
P23246	P23246	2	2	2	Splicing factor, proline- and glutamine-rich	SFPQ		1	2	2	2	1	2	1	2	1	1	1	2	1	2	1	1	1	2	1	2	1	1	4	4	4	76.149	707	707	0	4.7971	2.4	4	2.4	4	2.4	2.4	40188000	7635800	12465000	5513700	6263200	3773300
P23284	P23284	7	7	7	Peptidyl-prolyl cis-trans isomerase B	PPIB		1	7	7	7	5	6	5	4	4	6	5	6	5	4	4	6	5	6	5	4	4	6	38.4	38.4	38.4	23.742	216	216	0	18.123	28.7	34.3	28.2	20.4	23.1	32.9	163490000	44596000	37716000	26304000	20335000	13813000
P23396	P23396	16	16	16	40S ribosomal protein S3	RPS3		1	16	16	16	15	12	14	11	8	10	15	12	14	11	8	10	15	12	14	11	8	10	72.8	72.8	72.8	26.688	243	243	0	44.709	67.5	63.4	70	57.2	43.2	48.1	641840000	144840000	120620000	125650000	87865000	70131000
P23526	P23526	9	9	9	Adenosylhomocysteinase	AHCY		1	9	9	9	8	7	7	6	5	8	8	7	7	6	5	8	8	7	7	6	5	8	22.9	22.9	22.9	47.716	432	432	0	33.744	20.8	19	19	16.4	13.7	20.6	241480000	60583000	40891000	52935000	34144000	15810000
P23528	P23528	16	16	14	Cofilin-1	CFL1		1	16	16	14	10	13	15	11	10	11	10	13	15	11	10	11	8	11	13	10	9	10	73.5	73.5	62.7	18.502	166	166	0	84.281	53	72.9	73.5	60.8	54.8	68.7	2014300000	421220000	445520000	376120000	253590000	245980000
P24534	P24534	3	3	3	Elongation factor 1-beta	EEF1B2		1	3	3	3	3	2	2	2	1	1	3	2	2	2	1	1	3	2	2	2	1	1	16.4	16.4	16.4	24.763	225	225	0	14.53	16.4	12.4	12.4	12.4	6.7	6.7	33431000	8628400	5855300	6206200	5657400	3053800
P25205	P25205	2	2	2	DNA replication licensing factor MCM3	MCM3		1	2	2	2	1	0	1	0	0	0	1	0	1	0	0	0	1	0	1	0	0	0	4	4	4	90.98	808	808	0.0010593	2.5977	2.5	0	1.5	0	0	0	3087500	1373300	0	1714200	0	0
P25398	P25398	8	8	8	40S ribosomal protein S12	RPS12		1	8	8	8	6	8	7	5	4	6	6	8	7	5	4	6	6	8	7	5	4	6	66.7	66.7	66.7	14.515	132	132	0	48.514	50	66.7	50	49.2	39.4	49.2	266950000	71652000	61324000	72116000	19438000	19392000
P25705	P25705	6	6	6	ATP synthase subunit alpha, mitochondrial	ATP5A1		1	6	6	6	5	4	4	2	2	2	5	4	4	2	2	2	5	4	4	2	2	2	11.8	11.8	11.8	59.75	553	553	0	19.06	9.6	8.5	8.5	3.6	3.6	3.6	42515000	17156000	8818200	6727300	3518200	2996800
P25786	P25786	9	9	9	Proteasome subunit alpha type-1	PSMA1		1	9	9	9	7	7	8	5	5	5	7	7	8	5	5	5	7	7	8	5	5	5	34.2	34.2	34.2	29.555	263	263	0	36.948	29.7	32.7	33.1	16.7	24.3	19.8	225880000	70518000	48950000	53387000	12078000	24396000
P25787	P25787	8	8	8	Proteasome subunit alpha type-2	PSMA2		1	8	8	8	3	6	6	2	2	1	3	6	6	2	2	1	3	6	6	2	2	1	48.3	48.3	48.3	25.898	234	234	0	23.42	18.4	32.9	34.2	15.4	15.4	9.4	96726000	11146000	31983000	34898000	8520000	7327300
P25788	P25788	6	6	6	Proteasome subunit alpha type-3	PSMA3		1	6	6	6	5	4	2	2	2	2	5	4	2	2	2	2	5	4	2	2	2	2	25.5	25.5	25.5	28.433	255	255	0	15.709	22.7	15.3	7.1	8.2	8.2	8.2	55952000	18330000	11162000	4895600	6850000	9827700
P25789	P25789	9	9	9	Proteasome subunit alpha type-4	PSMA4		1	9	9	9	6	8	8	4	6	7	6	8	8	4	6	7	6	8	8	4	6	7	43.3	43.3	43.3	29.483	261	261	0	33.048	33.7	39.8	39.8	24.9	31.4	37.9	219560000	62864000	62373000	41477000	10763000	15017000
P25815	P25815	5	5	5	Protein S100-P	S100P		1	5	5	5	5	5	4	3	4	3	5	5	4	3	4	3	5	5	4	3	4	3	38.9	38.9	38.9	10.4	95	95	0	44.313	38.9	38.9	35.8	31.6	34.7	34.7	390480000	108340000	62226000	83028000	36040000	59438000
P26006	P26006	8	8	8	Integrin alpha-3;Integrin alpha-3 heavy chain;Integrin alpha-3 light chain	ITGA3		1	8	8	8	4	3	6	5	6	6	4	3	6	5	6	6	4	3	6	5	6	6	7.8	7.8	7.8	116.61	1051	1051	0	25.992	4.5	3.5	5.5	5.4	5.9	5.5	136650000	27001000	12612000	23454000	22729000	25273000
P26038	P26038	41	41	31	Moesin	MSN		1	41	41	31	27	25	21	28	28	28	27	25	21	28	28	28	21	18	16	22	21	22	52.5	52.5	40.2	67.819	577	577	0	170.85	40.7	38	33.1	36.4	43.2	35.9	1556000000	289590000	298370000	238420000	232430000	268560000
P26232	P26232	7	1	1	Catenin alpha-2	CTNNA2		1	7	1	1	4	5	6	5	5	5	1	1	1	1	1	1	1	1	1	1	1	1	9.5	1.9	1.9	105.31	953	953	0	8.2251	6.9	7.8	8.7	7.9	7.9	7.9	87967000	19051000	14377000	13634000	14947000	13290000
P26368	P26368	3	3	3	Splicing factor U2AF 65 kDa subunit	U2AF2		1	3	3	3	2	1	1	0	0	0	2	1	1	0	0	0	2	1	1	0	0	0	7.8	7.8	7.8	53.5	475	475	0	5.0962	6.1	3.8	1.7	0	0	0	17012000	14420000	1457400	1134400	0	0
P26373	P26373	13	13	13	60S ribosomal protein L13	RPL13		1	13	13	13	11	10	10	7	7	7	11	10	10	7	7	7	11	10	10	7	7	7	37.4	37.4	37.4	24.261	211	211	0	98.89	32.7	36.5	36.5	25.1	25.1	25.1	726710000	175000000	160610000	165700000	67151000	82310000
P26447	P26447	3	3	3	Protein S100-A4	S100A4		1	3	3	3	1	1	1	0	1	1	1	1	1	0	1	1	1	1	1	0	1	1	18.8	18.8	18.8	11.728	101	101	0	4.4377	9.9	8.9	7.9	0	9.9	8.9	26069000	6597700	7502600	2975700	0	0
P26599;O95758	P26599	3;1	3;1	3;1	Polypyrimidine tract-binding protein 1	PTBP1		2	3	3	3	3	3	2	1	1	1	3	3	2	1	1	1	3	3	2	1	1	1	9.2	9.2	9.2	57.221	531	531;552	0	6.9154	9.2	9.2	4.9	4.3	1.9	1.9	32662000	9888700	9020900	6428200	977010	2998700
P26639	P26639	6	6	6	Threonine--tRNA ligase, cytoplasmic	TARS		1	6	6	6	4	2	2	2	2	2	4	2	2	2	2	2	4	2	2	2	2	2	11.9	11.9	11.9	83.434	723	723	0	9.5184	7.9	4.1	3.7	4.3	3.6	3.7	24917000	8571600	4123700	4489100	2441000	2140700
P26640	P26640	5	5	5	Valine--tRNA ligase	VARS		1	5	5	5	2	4	3	0	1	1	2	4	3	0	1	1	2	4	3	0	1	1	6	6	6	140.47	1264	1264	0	10.652	2.5	4.4	3.6	0	1.2	1.3	23086000	4390900	9899000	5266800	0	1152500
P26641	P26641	7	7	7	Elongation factor 1-gamma	EEF1G		1	7	7	7	6	5	5	3	4	5	6	5	5	3	4	5	6	5	5	3	4	5	18.5	18.5	18.5	50.118	437	437	0	26.028	15.3	14.6	14.6	9.2	11.7	14.6	135610000	37888000	23577000	26929000	13261000	16438000
P27216	P27216	31	31	30	Annexin A13	ANXA13		1	31	31	30	26	27	26	20	24	23	26	27	26	20	24	23	25	26	25	19	23	22	76.9	76.9	76.9	35.415	316	316	0	315.97	74.1	73.7	73.4	61.1	66.1	63.3	3546400000	674540000	663950000	656510000	490380000	553470000
P27348	P27348	9	6	6	14-3-3 protein theta	YWHAQ		1	9	6	6	5	7	7	7	4	6	2	4	4	5	2	4	2	4	4	5	2	4	38	28.2	28.2	27.764	245	245	0	24.758	19.2	32.2	33.1	29.4	16.3	30.2	95109000	6146400	15274000	23908000	14877000	7564600
P27487	P27487	14	14	14	Dipeptidyl peptidase 4;Dipeptidyl peptidase 4 membrane form;Dipeptidyl peptidase 4 soluble form	DPP4		1	14	14	14	10	9	8	10	10	10	10	9	8	10	10	10	10	9	8	10	10	10	18.8	18.8	18.8	88.278	766	766	0	58.683	14.4	13.7	12.7	14	15.1	15.4	462110000	99741000	76048000	57947000	74844000	81493000
P27635;Q96L21	P27635	11;2	11;2	11;2	60S ribosomal protein L10	RPL10		2	11	11	11	10	6	7	7	6	3	10	6	7	7	6	3	10	6	7	7	6	3	40.2	40.2	40.2	24.604	214	214;214	0	38.716	40.2	27.6	31.8	31.8	31.3	10.7	272920000	88276000	48112000	57597000	31061000	26235000
P27701	P27701	7	7	7	CD82 antigen	CD82		1	7	7	7	6	4	6	5	5	4	6	4	6	5	5	4	6	4	6	5	5	4	26.2	26.2	26.2	29.625	267	267	0	57.967	26.2	22.1	25.8	22.1	22.1	22.1	746040000	135470000	117870000	166060000	126380000	99666000
P27708	P27708	1	1	1	CAD protein;Glutamine-dependent carbamoyl-phosphate synthase;Aspartate carbamoyltransferase;Dihydroorotase	CAD		1	1	1	1	1	1	0	1	0	0	1	1	0	1	0	0	1	1	0	1	0	0	0.5	0.5	0.5	242.98	2225	2225	0.0057307	1.8032	0.5	0.5	0	0.5	0	0	3888100	1444900	1304600	0	1138500	0
P27797	P27797	8	8	8	Calreticulin	CALR		1	8	8	8	4	5	4	4	1	6	4	5	4	4	1	6	4	5	4	4	1	6	29	29	29	48.141	417	417	0	40.524	15.3	15.8	12.5	13.9	2.9	22.8	130670000	35635000	33598000	20063000	15353000	3761100
P27824	P27824	7	7	7	Calnexin	CANX		1	7	7	7	6	1	5	2	3	2	6	1	5	2	3	2	6	1	5	2	3	2	12.5	12.5	12.5	67.567	592	592	0	14.149	10.8	2.5	10.8	5.1	7.6	5.1	71719000	29944000	1453100	20938000	5580800	7495300
P28062	P28062	3	3	3	Proteasome subunit beta type-8	PSMB8		1	3	3	3	3	3	3	2	2	2	3	3	3	2	2	2	3	3	3	2	2	2	14.5	14.5	14.5	30.354	276	276	0	14.391	14.5	14.5	14.5	10.1	10.1	10.1	64924000	11253000	17009000	14493000	9650900	5919600
P28066	P28066	8	8	8	Proteasome subunit alpha type-5	PSMA5		1	8	8	8	7	7	5	5	5	4	7	7	5	5	5	4	7	7	5	5	5	4	46.5	46.5	46.5	26.411	241	241	0	48.228	43.6	42.3	25.3	34.4	35.3	29	317520000	85795000	71884000	51787000	36394000	42896000
P28070	P28070	3	3	3	Proteasome subunit beta type-4	PSMB4		1	3	3	3	2	1	1	1	2	2	2	1	1	1	2	2	2	1	1	1	2	2	19.7	19.7	19.7	29.204	264	264	0	5.8237	15.9	7.6	3.8	7.6	11.4	11.4	30636000	6206400	4177700	0	4863000	7360200
P28072	P28072	5	5	5	Proteasome subunit beta type-6	PSMB6		1	5	5	5	4	3	2	1	2	1	4	3	2	1	2	1	4	3	2	1	2	1	21.3	21.3	21.3	25.357	239	239	0	10.285	17.6	12.1	8.4	4.6	8.8	4.6	81446000	35496000	12071000	7832800	8102100	9853600
P28074	P28074	8	8	8	Proteasome subunit beta type-5	PSMB5		1	8	8	8	7	5	8	4	4	3	7	5	8	4	4	3	7	5	8	4	4	3	28.1	28.1	28.1	28.48	263	263	0	34.13	28.1	22.8	28.1	15.2	14.8	14.8	141950000	38798000	26903000	35524000	12724000	14700000
P28799	P28799	1	1	1	Granulins;Acrogranin;Paragranulin;Granulin-1;Granulin-2;Granulin-3;Granulin-4;Granulin-5;Granulin-6;Granulin-7	GRN		1	1	1	1	1	1	1	1	1	1	1	1	1	1	1	1	1	1	1	1	1	1	2.7	2.7	2.7	63.544	593	593	0	5.7987	2.7	2.7	2.7	2.7	2.7	2.7	48029000	9329300	9943500	7598000	9402800	2638100
P28838	P28838	6	6	6	Cytosol aminopeptidase	LAP3		1	6	6	6	3	5	3	1	1	0	3	5	3	1	1	0	3	5	3	1	1	0	14.6	14.6	14.6	56.166	519	519	0	7.6922	6.4	11.6	6.7	3.1	2.3	0	22530000	5347200	9045300	5103600	1721900	1311600
P29144	P29144	2	2	2	Tripeptidyl-peptidase 2	TPP2		1	2	2	2	1	0	1	0	0	1	1	0	1	0	0	1	1	0	1	0	0	1	1.9	1.9	1.9	138.35	1249	1249	0.0084746	1.7158	0.8	0	0.8	0	0	1.1	5185200	2458000	0	1312900	0	0
P29317	P29317	11	11	11	Ephrin type-A receptor 2	EPHA2		1	11	11	11	5	4	4	7	5	7	5	4	4	7	5	7	5	4	4	7	5	7	16.5	16.5	16.5	108.27	976	976	0	26.943	5.7	5.3	5.3	9.8	8	8.6	107850000	15431000	12076000	11164000	26166000	21238000
P29373;P29762	P29373	4;1	4;1	4;1	Cellular retinoic acid-binding protein 2	CRABP2		2	4	4	4	3	3	3	4	4	3	3	3	3	4	4	3	3	3	3	4	4	3	33.3	33.3	33.3	15.693	138	138;137	0	16.618	26.8	28.3	28.3	33.3	33.3	26.8	133530000	20413000	20310000	19978000	22833000	31714000
P29401	P29401	13	13	13	Transketolase	TKT		1	13	13	13	9	12	8	5	6	4	9	12	8	5	6	4	9	12	8	5	6	4	26.6	26.6	26.6	67.877	623	623	0	39.668	20.7	23.8	17.5	12.8	15.7	11.4	229220000	57365000	54019000	48783000	22217000	28099000
P29692	P29692	3	3	3	Elongation factor 1-delta	EEF1D		1	3	3	3	2	2	3	2	2	2	2	2	3	2	2	2	2	2	3	2	2	2	11.7	11.7	11.7	31.121	281	281	0	14.1	8.5	8.5	11.7	7.5	7.5	7.5	39977000	6260000	7200200	6945000	6902600	5729600
P29966	P29966	10	10	10	Myristoylated alanine-rich C-kinase substrate	MARCKS		1	10	10	10	6	7	7	6	9	8	6	7	7	6	9	8	6	7	7	6	9	8	51.2	51.2	51.2	31.554	332	332	0	99.477	33.7	34.9	43.4	33.7	50	45.5	807630000	154190000	128920000	127760000	116840000	154130000
P30040	P30040	2	2	2	Endoplasmic reticulum resident protein 29	ERP29		1	2	2	2	2	0	1	0	0	0	2	0	1	0	0	0	2	0	1	0	0	0	8.4	8.4	8.4	28.993	261	261	0.0010526	2.5514	8.4	0	3.8	0	0	0	4444000	3403700	0	1040300	0	0
P30041	P30041	7	7	7	Peroxiredoxin-6	PRDX6		1	7	7	7	6	5	4	3	4	2	6	5	4	3	4	2	6	5	4	3	4	2	33.9	33.9	33.9	25.035	224	224	0	23.368	28.6	24.6	20.1	18.3	19.2	13.4	88561000	27726000	22282000	20025000	6883200	7561100
P30044	P30044	5	5	5	Peroxiredoxin-5, mitochondrial	PRDX5		1	5	5	5	2	4	3	3	2	1	2	4	3	3	2	1	2	4	3	3	2	1	36.4	36.4	36.4	22.086	214	214	0	7.3346	12.6	31.3	17.8	17.8	12.6	5.1	35674000	6900500	9678800	6218200	6354900	4211600
P30050	P30050	9	9	9	60S ribosomal protein L12	RPL12		1	9	9	9	8	9	8	3	5	4	8	9	8	3	5	4	8	9	8	3	5	4	60	60	60	17.818	165	165	0	67.916	60	60	60	24.8	38.8	29.7	654990000	193710000	164040000	144550000	37197000	56631000
P30084	P30084	2	2	2	Enoyl-CoA hydratase, mitochondrial	ECHS1		1	2	2	2	1	2	1	1	1	0	1	2	1	1	1	0	1	2	1	1	1	0	12.1	12.1	12.1	31.387	290	290	0	17.448	5.9	12.1	6.2	5.9	5.9	0	13826000	4044400	5009200	1233200	1838900	1699700
P30085	P30085	4	4	4	UMP-CMP kinase	CMPK1		1	4	4	4	1	4	2	1	0	0	1	4	2	1	0	0	1	4	2	1	0	0	22.4	22.4	22.4	22.222	196	196	0	6.0547	6.6	22.4	11.7	6.6	0	0	21638000	7262400	5589000	4816400	3970500	0
P30086	P30086	6	6	6	Phosphatidylethanolamine-binding protein 1;Hippocampal cholinergic neurostimulating peptide	PEBP1		1	6	6	6	3	4	3	2	2	3	3	4	3	2	2	3	3	4	3	2	2	3	51.9	51.9	51.9	21.057	187	187	0	25.128	26.7	39.6	26.2	18.2	15.5	22.5	57755000	12819000	17642000	8757900	5917000	3894900
P30101	P30101	16	16	16	Protein disulfide-isomerase A3	PDIA3		1	16	16	16	11	9	10	9	5	9	11	9	10	9	5	9	11	9	10	9	5	9	39.6	39.6	39.6	56.782	505	505	0	41.067	25.5	18.6	21.8	18.8	13.7	24	256290000	67011000	40695000	51844000	40768000	19151000
P30153	P30153	5	5	5	Serine/threonine-protein phosphatase 2A 65 kDa regulatory subunit A alpha isoform	PPP2R1A		1	5	5	5	2	2	1	2	2	3	2	2	1	2	2	3	2	2	1	2	2	3	10.5	10.5	10.5	65.308	589	589	0	8.6324	5.1	5.1	3.4	5.1	5.3	7.1	36765000	8353500	6957300	5095500	5999900	4865300
P30291	P30291	1	1	1	Wee1-like protein kinase	WEE1		1	1	1	1	0	1	1	0	0	0	0	1	1	0	0	0	0	1	1	0	0	0	1.2	1.2	1.2	71.597	646	646	1	-2	0	1.2	1.2	0	0	0	4461400	0	2288200	2173200	0	0
P30443;P30455	P30443	16;15	7;6	3;2	HLA class I histocompatibility antigen, A-1 alpha chain;HLA class I histocompatibility antigen, A-36 alpha chain	HLA-A	;	2	16	7	3	11	9	7	8	5	8	4	2	2	2	1	2	2	0	0	1	0	0	56.4	25.5	5.2	40.845	365	365;365	0	30.992	46	34	24.7	30.7	22.5	34.5	106590000	32326000	20646000	15538000	9261000	14111000
P30464;P30484;Q95365;Q29836;P30475	P30464	10;9;8;8;8	2;1;1;1;1	0;0;0;0;0	HLA class I histocompatibility antigen, B-15 alpha chain;HLA class I histocompatibility antigen, B-46 alpha chain;HLA class I histocompatibility antigen, B-38 alpha chain;HLA class I histocompatibility antigen, B-67 alpha chain;HLA class I histocompatibility antigen, B-39 alpha chain	HLA-B	;;;;	5	10	2	0	6	7	6	5	5	6	0	0	0	1	0	2	0	0	0	0	0	0	31.8	8.6	0	40.388	362	362;362;362;362;362	0	2.7042	21.5	22.4	18.8	18	18.8	21	9539700	0	0	0	4042600	0
P30483;P30488;P30487	P30483	10;8;8	2;0;0	0;0;0	HLA class I histocompatibility antigen, B-45 alpha chain;HLA class I histocompatibility antigen, B-50 alpha chain;HLA class I histocompatibility antigen, B-49 alpha chain	HLA-B	;;	3	10	2	0	4	7	5	7	5	7	0	2	1	2	1	2	0	0	0	0	0	0	29	3.6	0	40.414	362	362;362;362	0	5.7426	15.2	19.6	16	20.7	18.8	20.7	17676000	0	5317500	1728500	3273200	2694700
P30520	P30520	1	1	1	Adenylosuccinate synthetase isozyme 2	ADSS		1	1	1	1	0	0	1	1	0	1	0	0	1	1	0	1	0	0	1	1	0	1	3.1	3.1	3.1	50.097	456	456	0	4.2963	0	0	3.1	3.1	0	3.1	3364500	0	0	1421100	1091500	0
P30626	P30626	2	2	2	Sorcin	SRI		1	2	2	2	1	0	0	2	2	2	1	0	0	2	2	2	1	0	0	2	2	2	11.6	11.6	11.6	21.676	198	198	0	5.1684	6.1	0	0	11.6	11.6	11.6	22857000	3953500	0	0	6351300	6464800
P30685;P30491;P10319;P30495;P18465;P03989	P30685	11;11;10;8;7;7	6;6;5;3;2;3	0;0;0;0;0;0	HLA class I histocompatibility antigen, B-35 alpha chain;HLA class I histocompatibility antigen, B-53 alpha chain;HLA class I histocompatibility antigen, B-58 alpha chain;HLA class I histocompatibility antigen, B-56 alpha chain;HLA class I histocompatibility antigen, B-57 alpha chain;HLA class I histocompatibility antigen, B-27 alpha chain	HLA-B	;;;;;	6	11	6	0	8	8	7	6	7	6	4	4	4	4	5	4	0	0	0	0	0	0	35.9	20.7	0	40.455	362	362;362;362;362;362;362	0	57.752	27.3	26.8	23.2	23.8	26.2	23.8	253610000	66981000	45955000	47599000	24447000	38883000
P30740	P30740	4	4	4	Leukocyte elastase inhibitor	SERPINB1		1	4	4	4	3	2	2	2	3	2	3	2	2	2	3	2	3	2	2	2	3	2	11.6	11.6	11.6	42.741	379	379	0	6.0493	9.2	5.3	5.5	5.5	9.2	5.5	37443000	8064000	5456100	6574500	5238100	6598000
P31153	P31153	2	2	2	S-adenosylmethionine synthase isoform type-2	MAT2A		1	2	2	2	1	0	2	1	1	1	1	0	2	1	1	1	1	0	2	1	1	1	7.6	7.6	7.6	43.66	395	395	0	5.5953	3.8	0	7.6	3.8	3.8	3.8	14644000	3692100	0	3681600	2167100	2677700
P31431	P31431	4	4	4	Syndecan-4	SDC4		1	4	4	4	3	2	2	4	4	3	3	2	2	4	4	3	3	2	2	4	4	3	18.2	18.2	18.2	21.641	198	198	0	40.407	18.2	13.1	12.1	18.2	18.2	17.7	137070000	29602000	14628000	3202000	35561000	38091000
P31689	P31689	4	4	4	DnaJ homolog subfamily A member 1	DNAJA1		1	4	4	4	3	2	3	4	3	3	3	2	3	4	3	3	3	2	3	4	3	3	13.9	13.9	13.9	44.868	397	397	0	8.8113	11.3	8.1	11.3	13.9	11.3	11.3	91710000	20790000	11065000	14572000	17515000	14286000
P31939	P31939	8	8	8	Bifunctional purine biosynthesis protein PURH;Phosphoribosylaminoimidazolecarboxamide formyltransferase;IMP cyclohydrolase	ATIC		1	8	8	8	6	4	3	3	3	5	6	4	3	3	3	5	6	4	3	3	3	5	21.1	21.1	21.1	64.615	592	592	0	16.486	15	11.1	6.6	7.8	7.8	14.7	65282000	19743000	15727000	8092800	6222300	5847700
P31943;P55795	P31943	5;4	5;4	3;3	Heterogeneous nuclear ribonucleoprotein H;Heterogeneous nuclear ribonucleoprotein H, N-terminally processed;Heterogeneous nuclear ribonucleoprotein H2	HNRNPH1;HNRNPH2	;	2	5	5	3	3	3	3	2	2	1	3	3	3	2	2	1	1	1	1	1	1	0	16.3	16.3	10.2	49.229	449	449;449	0	12.961	9.6	9.8	9.8	5.1	5.1	2.2	54009000	14851000	11169000	15917000	3377600	4574300
P31946	P31946	11	7	7	14-3-3 protein beta/alpha;14-3-3 protein beta/alpha, N-terminally processed	YWHAB		1	11	7	7	8	9	7	8	7	7	5	6	4	5	4	4	5	6	4	5	4	4	53.3	39.8	39.8	28.082	246	246	0	41.821	32.9	44.7	31.3	33.7	33.7	33.7	464690000	98239000	80523000	54170000	72908000	87634000
P31947	P31947	4	2	2	14-3-3 protein sigma	SFN		1	4	2	2	4	4	3	1	2	3	2	2	1	0	1	2	2	2	1	0	1	2	14.9	8.9	8.9	27.774	248	248	0	9.1887	14.9	14.9	11.7	3.2	8.9	12.1	72755000	31676000	25784000	7484000	0	2631200
P31948	P31948	6	6	6	Stress-induced-phosphoprotein 1	STIP1		1	6	6	6	2	2	3	1	1	1	2	2	3	1	1	1	2	2	3	1	1	1	13.8	13.8	13.8	62.639	543	543	0	7.021	6.1	5.5	6.1	1.7	2.9	1.7	29651000	7624700	6769800	9706500	0	5550200
P31949	P31949	5	5	5	Protein S100-A11;Protein S100-A11, N-terminally processed	S100A11		1	5	5	5	3	2	4	3	2	3	3	2	4	3	2	3	3	2	4	3	2	3	45.7	45.7	45.7	11.74	105	105	0	16.315	26.7	18.1	37.1	26.7	18.1	26.7	248720000	60266000	24568000	22299000	54605000	31120000
P32119	P32119	6	5	5	Peroxiredoxin-2	PRDX2		1	6	5	5	5	5	5	5	1	3	4	4	4	4	0	2	4	4	4	4	0	2	30.3	24.7	24.7	21.892	198	198	0	9.8321	26.3	26.3	25.3	26.3	5.6	21.2	53674000	17881000	12673000	10388000	8832200	0
P32969	P32969	5	5	5	60S ribosomal protein L9	RPL9		1	5	5	5	4	5	3	1	2	3	4	5	3	1	2	3	4	5	3	1	2	3	28.6	28.6	28.6	21.863	192	192	0	20.078	28.6	28.6	22.4	5.2	5.7	15.6	84760000	24267000	29180000	12459000	2792800	7503900
P33176;O60282;Q12840	P33176	4;2;2	4;2;2	4;2;2	Kinesin-1 heavy chain;Kinesin heavy chain isoform 5C;Kinesin heavy chain isoform 5A	KIF5B;KIF5C;KIF5A	;;	3	4	4	4	1	0	2	0	1	0	1	0	2	0	1	0	1	0	2	0	1	0	4.7	4.7	4.7	109.68	963	963;957;1032	0	6.319	1.1	0	2.4	0	1.1	0	11385000	1487500	0	5090100	0	4807000
P34897	P34897	3	3	3	Serine hydroxymethyltransferase, mitochondrial	SHMT2		1	3	3	3	3	1	1	0	0	1	3	1	1	0	0	1	3	1	1	0	0	1	9.5	9.5	9.5	55.992	504	504	0	10.561	9.5	2.6	2.8	0	0	2.6	15906000	9414700	3441400	1025500	0	0
P34932	P34932	3	2	2	Heat shock 70 kDa protein 4	HSPA4		1	3	2	2	2	2	3	1	2	1	1	1	2	1	2	1	1	1	2	1	2	1	5.4	3.7	3.7	94.33	840	840	0	4.7177	3.8	3.8	5.4	1.5	3.7	1.5	14634000	1818100	1599200	4205000	2489000	2515500
P35080	P35080	2	2	2	Profilin-2	PFN2		1	2	2	2	1	2	1	0	1	1	1	2	1	0	1	1	1	2	1	0	1	1	17.9	17.9	17.9	15.046	140	140	0	4.6226	7.9	17.9	10	0	10	10	21918000	6528400	7370900	3380100	0	2708700
P35221;REV__Q9P2T0;Q9UI47	P35221	40;1;1	40;1;1	34;0;1	Catenin alpha-1	CTNNA1		3	40	40	34	26	30	28	28	30	27	26	30	28	28	30	27	23	26	23	24	26	23	56.4	56.4	48.3	100.07	906	906;379;895	0	278.29	39.5	47.1	42.8	41.7	47.7	43	1918800000	347820000	337950000	307770000	299140000	296440000
P35222	P35222	15	11	11	Catenin beta-1	CTNNB1		1	15	11	11	9	10	7	5	7	4	8	7	5	4	6	3	8	7	5	4	6	3	23.3	17.3	17.3	85.496	781	781	0	37.515	15.6	16.1	10.9	7.6	11.1	7.4	172810000	48099000	28640000	20377000	26527000	33652000
P35232	P35232	2	2	2	Prohibitin	PHB		1	2	2	2	2	0	1	1	1	1	2	0	1	1	1	1	2	0	1	1	1	1	8.1	8.1	8.1	29.804	272	272	0	3.7907	8.1	0	4.4	4.4	4.4	4.4	14114000	5100700	0	1986100	2093800	2314300
P35579;P35749	P35579	43;6	43;6	32;1	Myosin-9	MYH9		2	43	43	32	31	21	24	22	23	23	31	21	24	22	23	23	22	12	17	14	17	14	25.5	25.5	18.9	226.53	1960	1960;1972	0	213.19	19.7	13.4	16.2	16.2	17.1	17	525170000	139900000	81569000	84849000	73308000	73740000
P35606	P35606	4	4	4	Coatomer subunit beta	COPB2		1	4	4	4	1	1	2	4	3	2	1	1	2	4	3	2	1	1	2	4	3	2	5.4	5.4	5.4	102.49	906	906	0	8.642	1	1	2.1	5.4	3.4	2.1	28952000	2315100	3065700	4243000	8982700	5867300
P35611	P35611	2	2	2	Alpha-adducin	ADD1		1	2	2	2	0	2	1	1	0	1	0	2	1	1	0	1	0	2	1	1	0	1	3.8	3.8	3.8	80.954	737	737	0	3.6391	0	3.8	2.4	2.4	0	2.4	9494600	0	3302400	1870400	2175700	0
P35613	P35613	8	8	8	Basigin	BSG		1	8	8	8	6	5	6	7	8	8	6	5	6	7	8	8	6	5	6	7	8	8	24.9	24.9	24.9	42.2	385	385	0	49.908	23.1	18.4	22.9	23.1	24.9	24.9	473440000	86268000	74747000	73434000	79069000	81337000
P35659	P35659	2	2	2	Protein DEK	DEK		1	2	2	2	1	1	0	0	0	0	1	1	0	0	0	0	1	1	0	0	0	0	5.9	5.9	5.9	42.674	375	375	0.00097561	1.9402	3.2	2.7	0	0	0	0	1695700	0	1695700	0	0	0
P35998	P35998	6	6	6	26S protease regulatory subunit 7	PSMC2		1	6	6	6	3	2	3	1	3	3	3	2	3	1	3	3	3	2	3	1	3	3	17.3	17.3	17.3	48.633	433	433	0	12.9	7.6	5.5	9.7	2.5	8.1	8.1	50412000	13291000	5913000	5521300	3324000	11528000
P36578	P36578	31	31	31	60S ribosomal protein L4	RPL4		1	31	31	31	27	29	26	19	17	19	27	29	26	19	17	19	27	29	26	19	17	19	57.8	57.8	57.8	47.697	427	427	0	194.12	54.8	57.6	54.1	41.5	39.8	43.3	2127700000	539170000	549250000	433850000	207510000	201440000
P36871	P36871	1	1	1	Phosphoglucomutase-1	PGM1		1	1	1	1	1	0	1	0	0	0	1	0	1	0	0	0	1	0	1	0	0	0	2.8	2.8	2.8	61.448	562	562	0.0010363	2.4484	2.8	0	2.8	0	0	0	2276900	1099600	0	1177300	0	0
P36873	P36873	11	2	2	Serine/threonine-protein phosphatase PP1-gamma catalytic subunit	PPP1CC		1	11	2	2	7	5	6	5	4	4	1	0	0	2	0	1	1	0	0	2	0	1	38.1	7.4	7.4	36.983	323	323	0	3.4501	25.7	21.1	24.5	18.9	17.3	14.9	7469200	3668400	0	0	2677900	0
P36952	P36952	3	3	3	Serpin B5	SERPINB5		1	3	3	3	2	2	0	0	0	0	2	2	0	0	0	0	2	2	0	0	0	0	9.6	9.6	9.6	42.1	375	375	0	3.6378	4.5	7.5	0	0	0	0	9029600	5357800	3671800	0	0	0
P36957	P36957	2	2	2	Dihydrolipoyllysine-residue succinyltransferase component of 2-oxoglutarate dehydrogenase complex, mitochondrial	DLST		1	2	2	2	1	2	1	1	2	2	1	2	1	1	2	2	1	2	1	1	2	2	5.7	5.7	5.7	48.755	453	453	0	14.49	3.1	5.7	3.1	3.1	5.7	5.7	29244000	5563000	6470400	2970500	3435900	5753000
P37108	P37108	2	2	2	Signal recognition particle 14 kDa protein	SRP14		1	2	2	2	2	1	1	0	1	1	2	1	1	0	1	1	2	1	1	0	1	1	19.9	19.9	19.9	14.57	136	136	0	11.88	19.9	10.3	9.6	0	10.3	10.3	24133000	9666000	3838500	3613400	0	3681100
P37802	P37802	11	11	11	Transgelin-2	TAGLN2		1	11	11	11	9	8	7	8	5	8	9	8	7	8	5	8	9	8	7	8	5	8	55.8	55.8	55.8	22.391	199	199	0	57.657	50.3	42.7	33.2	48.7	29.6	44.2	307520000	72224000	59386000	56579000	45417000	29086000
P37837	P37837	6	6	6	Transaldolase	TALDO1		1	6	6	6	6	6	6	4	5	4	6	6	6	4	5	4	6	6	6	4	5	4	19.3	19.3	19.3	37.54	337	337	0	11.996	19.3	19.3	19.3	12.2	15.7	12.2	136520000	35438000	26787000	26376000	16630000	16321000
P38117	P38117	2	2	2	Electron transfer flavoprotein subunit beta	ETFB		1	2	2	2	2	1	1	1	1	1	2	1	1	1	1	1	2	1	1	1	1	1	11.4	11.4	11.4	27.843	255	255	0	9.1397	11.4	6.7	6.7	6.7	6.7	6.7	16371000	6322600	2258500	2380000	1913500	1734200
P38571	P38571	1	1	1	Lysosomal acid lipase/cholesteryl ester hydrolase	LIPA		1	1	1	1	1	1	1	0	0	0	1	1	1	0	0	0	1	1	1	0	0	0	2.8	2.8	2.8	45.418	399	399	0.0019342	1.895	2.8	2.8	2.8	0	0	0	6410700	2103400	2293300	2014000	0	0
P38646	P38646	9	8	8	Stress-70 protein, mitochondrial	HSPA9		1	9	8	8	4	5	5	5	5	3	3	4	5	5	5	3	3	4	5	5	5	3	16.3	15.3	15.3	73.68	679	679	0	18.007	6	9.7	10.9	9.7	9.7	5.7	60336000	6439200	10951000	13739000	8305700	13676000
P38919	P38919	5	2	2	Eukaryotic initiation factor 4A-III;Eukaryotic initiation factor 4A-III, N-terminally processed	EIF4A3		1	5	2	2	1	2	3	1	0	1	0	0	1	1	0	1	0	0	1	1	0	1	11.9	5.8	5.8	46.871	411	411	0	2.6898	1.9	6.1	4.9	3.2	0	3.2	4809900	0	0	2245000	1069600	0
P39019	P39019	15	15	15	40S ribosomal protein S19	RPS19		1	15	15	15	13	14	11	11	12	11	13	14	11	11	12	11	13	14	11	11	12	11	59.3	59.3	59.3	16.06	145	145	0	89.544	59.3	58.6	52.4	57.2	53.1	50.3	1003800000	234100000	213820000	183640000	119470000	119890000
P39023;Q92901	P39023	17;2	17;2	17;2	60S ribosomal protein L3	RPL3		2	17	17	17	14	12	11	7	9	8	14	12	11	7	9	8	14	12	11	7	9	8	35.5	35.5	35.5	46.108	403	403;407	0	55.003	31.3	26.6	26.6	21.1	23.1	22.6	743810000	211500000	145560000	138220000	72784000	93340000
P39060	P39060	4	4	4	Collagen alpha-1(XVIII) chain;Endostatin	COL18A1		1	4	4	4	1	1	1	1	2	2	1	1	1	1	2	2	1	1	1	1	2	2	3.1	3.1	3.1	178.19	1754	1754	0	16.417	0.5	1	1	1	1.6	1.9	31893000	1558000	3836100	3948000	5834100	6599500
P39748	P39748	1	1	1	Flap endonuclease 1	FEN1		1	1	1	1	0	1	1	1	0	0	0	1	1	1	0	0	0	1	1	1	0	0	5.3	5.3	5.3	42.592	380	380	0	4.7187	0	5.3	5.3	5.3	0	0	9902000	0	3031400	3762000	3108600	0
P40121	P40121	5	5	5	Macrophage-capping protein	CAPG		1	5	5	5	2	3	2	1	1	1	2	3	2	1	1	1	2	3	2	1	1	1	17	17	17	38.498	348	348	0	12.795	7.2	9.8	9.8	3.7	3.4	3.4	170680000	5128100	84857000	7218000	1094700	2789700
P40199	P40199	1	1	1	Carcinoembryonic antigen-related cell adhesion molecule 6	CEACAM6		1	1	1	1	0	1	1	1	1	1	0	1	1	1	1	1	0	1	1	1	1	1	6.1	6.1	6.1	37.194	344	344	0	4.9263	0	6.1	6.1	6.1	6.1	6.1	15777000	0	3854800	3698000	2995800	2298100
P40227	P40227	17	17	14	T-complex protein 1 subunit zeta	CCT6A		1	17	17	14	7	12	10	9	10	8	7	12	10	9	10	8	6	11	9	7	8	7	39	39	33.3	58.024	531	531	0	61.254	15.6	24.9	24.9	21.5	28.6	20.2	321280000	36554000	57654000	43196000	70531000	54539000
P40306	P40306	1	1	1	Proteasome subunit beta type-10	PSMB10		1	1	1	1	1	0	0	0	1	1	1	0	0	0	1	1	1	0	0	0	1	1	7.3	7.3	7.3	28.936	273	273	0	2.723	7.3	0	0	0	7.3	7.3	3680500	2201400	0	0	0	695940
P40429;Q6NVV1	P40429	11;4	11;4	11;4	60S ribosomal protein L13a	RPL13A		2	11	11	11	9	8	9	6	7	6	9	8	9	6	7	6	9	8	9	6	7	6	36.9	36.9	36.9	23.577	203	203;102	0	44.426	36.9	33.5	33.5	27.1	30.5	27.1	505110000	123020000	47882000	115330000	83703000	52903000
P40925	P40925	3	3	3	Malate dehydrogenase, cytoplasmic	MDH1		1	3	3	3	0	1	1	2	1	1	0	1	1	2	1	1	0	1	1	2	1	1	15.9	15.9	15.9	36.426	334	334	0	4.5594	0	5.1	4.8	11.1	5.1	5.1	17290000	0	4067400	3548300	4458000	2550300
P40926	P40926	3	3	3	Malate dehydrogenase, mitochondrial	MDH2		1	3	3	3	1	2	1	0	0	0	1	2	1	0	0	0	1	2	1	0	0	0	15.7	15.7	15.7	35.503	338	338	0	7.1606	5.6	10.1	3.6	0	0	0	8877400	1436000	5910700	1530600	0	0
P40939	P40939	1	1	1	Trifunctional enzyme subunit alpha, mitochondrial;Long-chain enoyl-CoA hydratase;Long chain 3-hydroxyacyl-CoA dehydrogenase	HADHA		1	1	1	1	0	0	0	0	0	1	0	0	0	0	0	1	0	0	0	0	0	1	2.8	2.8	2.8	82.999	763	763	0	2.9176	0	0	0	0	0	2.8	572770	0	0	0	0	0
P41091;Q2VIR3	P41091	5;3	5;3	5;3	Eukaryotic translation initiation factor 2 subunit 3;Putative eukaryotic translation initiation factor 2 subunit 3-like protein	EIF2S3;EIF2S3L	;	2	5	5	5	4	0	3	0	0	0	4	0	3	0	0	0	4	0	3	0	0	0	20.3	20.3	20.3	51.109	472	472;472	0	10.202	17.4	0	11.2	0	0	0	16851000	8628200	0	8223300	0	0
P41250	P41250	2	2	2	Glycine--tRNA ligase	GARS		1	2	2	2	2	0	0	0	1	1	2	0	0	0	1	1	2	0	0	0	1	1	3.2	3.2	3.2	83.165	739	739	0	3.3756	3.2	0	0	0	1.8	1.8	8483900	5687800	0	0	0	1322200
P41252	P41252	8	8	8	Isoleucine--tRNA ligase, cytoplasmic	IARS		1	8	8	8	2	1	3	3	4	4	2	1	3	3	4	4	2	1	3	3	4	4	8.9	8.9	8.9	144.5	1262	1262	0	16.104	2.2	0.8	4	4	4.5	5	39579000	6803100	1307900	8867200	8678700	6257000
P42224	P42224	3	3	3	Signal transducer and activator of transcription 1-alpha/beta	STAT1		1	3	3	3	1	3	1	2	2	1	1	3	1	2	2	1	1	3	1	2	2	1	5.3	5.3	5.3	87.334	750	750	0	7.5895	1.6	5.3	1.6	3.5	3.5	1.6	16521000	2635600	4611600	2257000	2601400	2357400
P42330;Q04828;P52895;P17516	P42330	2;1;1;1	2;1;1;1	2;1;1;1	Aldo-keto reductase family 1 member C3;Aldo-keto reductase family 1 member C1;Aldo-keto reductase family 1 member C2;Aldo-keto reductase family 1 member C4	AKR1C3;AKR1C1;AKR1C2;AKR1C4	;;;	4	2	2	2	2	2	1	1	1	0	2	2	1	1	1	0	2	2	1	1	1	0	9.6	9.6	9.6	36.853	323	323;323;323;323	0	4.8082	9.6	9.6	2.8	6.8	6.8	0	23571000	8259800	6681900	5230700	1754700	1644100
P42766	P42766	6	6	6	60S ribosomal protein L35	RPL35		1	6	6	6	6	6	6	3	1	2	6	6	6	3	1	2	6	6	6	3	1	2	27.6	27.6	27.6	14.551	123	123	0	37.808	27.6	27.6	27.6	23.6	7.3	15.4	200900000	81202000	48770000	43962000	13292000	3026900
P43243	P43243	1	1	1	Matrin-3	MATR3		1	1	1	1	1	1	0	0	0	0	1	1	0	0	0	0	1	1	0	0	0	0	2.2	2.2	2.2	94.622	847	847	0.0010537	2.5629	2.2	2.2	0	0	0	0	5754300	2868300	2886000	0	0	0
P43487	P43487	7	7	7	Ran-specific GTPase-activating protein	RANBP1		1	7	7	7	4	4	5	3	5	2	4	4	5	3	5	2	4	4	5	3	5	2	50.2	50.2	50.2	23.31	201	201	0	15.976	32.3	26.9	33.3	15.4	33.3	10	175460000	37558000	33052000	39140000	19934000	33163000
P43686	P43686	3	3	3	26S protease regulatory subunit 6B	PSMC4		1	3	3	3	2	1	1	0	1	1	2	1	1	0	1	1	2	1	1	0	1	1	11.2	11.2	11.2	47.366	418	418	0	7.1794	6.9	2.2	2.2	0	4.3	4.3	16153000	8207500	2199100	2271600	0	1412400
P45880	P45880	4	4	4	Voltage-dependent anion-selective channel protein 2	VDAC2		1	4	4	4	2	3	3	1	1	1	2	3	3	1	1	1	2	3	3	1	1	1	19	19	19	31.566	294	294	0	6.236	8.8	12.2	15.6	4.1	4.1	4.1	26301000	6057300	6146500	7837900	2129300	1973700
P45974	P45974	6	6	6	Ubiquitin carboxyl-terminal hydrolase 5	USP5		1	6	6	6	3	3	4	1	1	2	3	3	4	1	1	2	3	3	4	1	1	2	10.5	10.5	10.5	95.785	858	858	0	31.194	5	5	6.9	1.4	1.4	3.1	21845000	5356700	6231600	5051900	1279200	1161000
P46087	P46087	5	5	5	Probable 28S rRNA (cytosine(4447)-C(5))-methyltransferase	NOP2		1	5	5	5	4	5	3	1	1	1	4	5	3	1	1	1	4	5	3	1	1	1	8.4	8.4	8.4	89.301	812	812	0	14.334	7.3	8.4	5.4	1.8	1.8	1.8	34884000	17348000	7447700	6183000	1722000	2182600
P46109	P46109	2	2	2	Crk-like protein	CRKL		1	2	2	2	1	1	2	1	1	0	1	1	2	1	1	0	1	1	2	1	1	0	10.9	10.9	10.9	33.777	303	303	0	4.6116	5.9	5.9	10.9	5.9	5.9	0	11330000	2342600	2814100	3408700	1386200	1378600
P46776	P46776	6	6	6	60S ribosomal protein L27a	RPL27A		1	6	6	6	6	6	4	5	3	4	6	6	4	5	3	4	6	6	4	5	3	4	32.4	32.4	32.4	16.561	148	148	0	19.873	32.4	32.4	24.3	32.4	23.6	31.1	326560000	91592000	77439000	60909000	41232000	23591000
P46777	P46777	12	12	12	60S ribosomal protein L5	RPL5		1	12	12	12	9	9	9	7	7	8	9	9	9	7	7	8	9	9	9	7	7	8	39.7	39.7	39.7	34.362	297	297	0	85.496	35.4	35.7	35.7	26.9	31	31.6	410040000	89524000	78937000	63750000	59715000	56884000
P46778	P46778	6	6	6	60S ribosomal protein L21	RPL21		1	6	6	6	5	5	4	2	3	3	5	5	4	2	3	3	5	5	4	2	3	3	33.1	33.1	33.1	18.565	160	160	0	21.612	28.8	28.8	24.4	14.4	20	20	488990000	123970000	110900000	83472000	56427000	60480000
P46779	P46779	6	6	6	60S ribosomal protein L28	RPL28		1	6	6	6	4	3	3	2	1	3	4	3	3	2	1	3	4	3	3	2	1	3	31.4	31.4	31.4	15.747	137	137	0	14.77	23.4	24.1	24.1	15.3	9.5	23.4	134490000	32326000	21932000	35600000	14095000	10415000
P46781	P46781	11	11	11	40S ribosomal protein S9	RPS9		1	11	11	11	9	8	10	7	7	9	9	8	10	7	7	9	9	8	10	7	7	9	38.7	38.7	38.7	22.591	194	194	0	29.541	38.1	34	38.7	30.4	34	34.5	506730000	136200000	93907000	105990000	42565000	57669000
P46782	P46782	8	8	8	40S ribosomal protein S5;40S ribosomal protein S5, N-terminally processed	RPS5		1	8	8	8	6	5	5	6	4	5	6	5	5	6	4	5	6	5	5	6	4	5	42.6	42.6	42.6	22.876	204	204	0	39.007	31.9	26.5	25	34.3	26.5	30.4	500440000	115660000	78016000	71654000	81880000	76007000
P46783;Q9NQ39	P46783	5;2	5;2	5;2	40S ribosomal protein S10	RPS10		2	5	5	5	3	4	4	3	4	3	3	4	4	3	4	3	3	4	4	3	4	3	29.1	29.1	29.1	18.898	165	165;176	0	16.854	18.2	23.6	23.6	23.6	20	20	97320000	16037000	12613000	6882700	15267000	24796000
P46940;Q86VI3	P46940	47;2	47;2	46;1	Ras GTPase-activating-like protein IQGAP1	IQGAP1		2	47	47	46	34	28	28	25	28	26	34	28	28	25	28	26	33	27	27	24	27	25	32.9	32.9	32.3	189.25	1657	1657;1631	0	183.25	25.5	22.5	21.1	20.6	21.5	21.5	872510000	205970000	145440000	145870000	127840000	134580000
P47755	P47755	3	2	2	F-actin-capping protein subunit alpha-2	CAPZA2		1	3	2	2	3	2	1	3	3	3	2	1	1	2	2	2	2	1	1	2	2	2	14.7	11.2	11.2	32.949	286	286	0	13.775	14.7	9.8	6.3	14.7	14.7	14.7	30069000	10556000	3628500	3492900	5337200	4923600
P47756	P47756	5	5	5	F-actin-capping protein subunit beta	CAPZB		1	5	5	5	5	3	3	4	4	4	5	3	3	4	4	4	5	3	3	4	4	4	18.1	18.1	18.1	31.35	277	277	0	16.352	18.1	13	13	18.1	18.1	18.1	59156000	15234000	9032500	6899900	10329000	8702100
P47897	P47897	2	2	2	Glutamine--tRNA ligase	QARS		1	2	2	2	1	0	1	0	0	0	1	0	1	0	0	0	1	0	1	0	0	0	3.1	3.1	3.1	87.798	775	775	0	3.196	1.2	0	1.9	0	0	0	2669700	1705700	0	964030	0	0
P47914	P47914	3	3	3	60S ribosomal protein L29	RPL29		1	3	3	3	3	3	3	1	1	0	3	3	3	1	1	0	3	3	3	1	1	0	20.8	20.8	20.8	17.752	159	159	0	14.127	20.8	20.8	20.8	9.4	9.4	0	550380000	192870000	161690000	103430000	38270000	54137000
P48147	P48147	1	1	1	Prolyl endopeptidase	PREP		1	1	1	1	1	1	1	0	0	0	1	1	1	0	0	0	1	1	1	0	0	0	2.4	2.4	2.4	80.699	710	710	0.001065	2.6195	2.4	2.4	2.4	0	0	0	4116500	1817300	1174000	1125200	0	0
P48230	P48230	1	1	1	Transmembrane 4 L6 family member 4	TM4SF4		1	1	1	1	0	0	0	0	1	0	0	0	0	0	1	0	0	0	0	0	1	0	7.9	7.9	7.9	21.396	202	202	0.00098522	1.9792	0	0	0	0	7.9	0	0	0	0	0	0	0
P48444	P48444	2	2	2	Coatomer subunit delta	ARCN1		1	2	2	2	1	2	2	2	2	1	1	2	2	2	2	1	1	2	2	2	2	1	4.1	4.1	4.1	57.21	511	511	0	5.6179	2.3	4.1	4.1	4.1	4.1	1.8	15180000	2358700	3435800	3679100	2451500	2177400
P48509	P48509	5	5	5	CD151 antigen	CD151		1	5	5	5	5	5	4	3	5	3	5	5	4	3	5	3	5	5	4	3	5	3	17	17	17	28.295	253	253	0	13.775	17	17	13.4	10.3	17	10.3	512220000	109800000	98549000	67745000	65949000	95202000
P48643	P48643	17	17	17	T-complex protein 1 subunit epsilon	CCT5		1	17	17	17	10	10	9	7	6	10	10	10	9	7	6	10	10	10	9	7	6	10	38.4	38.4	38.4	59.67	541	541	0	33.504	23.3	21.8	21.6	17	12.8	22.9	214220000	45703000	39629000	39504000	25086000	25737000
P48723	P48723	2	2	2	Heat shock 70 kDa protein 13	HSPA13		1	2	2	2	1	1	1	2	1	1	1	1	1	2	1	1	1	1	1	2	1	1	5.7	5.7	5.7	51.927	471	471	0.0010101	2.1361	2.1	2.1	2.1	5.7	2.1	2.1	11403000	1847000	1696700	1649000	2757300	1746000
P48735	P48735	2	2	2	Isocitrate dehydrogenase [NADP], mitochondrial	IDH2		1	2	2	2	1	1	0	0	1	1	1	1	0	0	1	1	1	1	0	0	1	1	6.4	6.4	6.4	50.909	452	452	0	3.5815	3.5	2.9	0	0	2.9	2.9	8653200	1606700	2144200	0	0	2494100
P48739	P48739	1	1	1	Phosphatidylinositol transfer protein beta isoform	PITPNB		1	1	1	1	1	0	1	1	1	0	1	0	1	1	1	0	1	0	1	1	1	0	8.5	8.5	8.5	31.54	271	271	0.0076118	1.7723	8.5	0	8.5	8.5	8.5	0	7455700	2240500	0	2218600	1569400	1427200
P48960;Q9UHX3	P48960	4;1	4;1	4;1	CD97 antigen;CD97 antigen subunit alpha;CD97 antigen subunit beta	CD97		2	4	4	4	2	2	2	0	2	1	2	2	2	0	2	1	2	2	2	0	2	1	6.8	6.8	6.8	91.868	835	835;823	0	10.298	2.9	4	3.2	0	2.9	1.7	22381000	6136200	4085200	5666200	0	2526000
P49006	P49006	7	7	7	MARCKS-related protein	MARCKSL1		1	7	7	7	5	5	6	4	6	4	5	5	6	4	6	4	5	5	6	4	6	4	77.4	77.4	77.4	19.529	195	195	0	49.095	54.4	54.4	73.8	35.4	73.8	49.2	813590000	176720000	127150000	157710000	83534000	148450000
P49207	P49207	4	4	4	60S ribosomal protein L34	RPL34		1	4	4	4	2	3	3	3	2	3	2	3	3	3	2	3	2	3	3	3	2	3	23.1	23.1	23.1	13.293	117	117	0	8.864	14.5	15.4	15.4	15.4	14.5	15.4	142460000	23568000	20502000	31615000	22843000	20249000
P49257	P49257	2	2	2	Protein ERGIC-53	LMAN1		1	2	2	2	1	1	1	0	1	0	1	1	1	0	1	0	1	1	1	0	1	0	3.9	3.9	3.9	57.548	510	510	0	2.8854	2.4	2.4	2.4	0	1.6	0	6830300	2131900	2105700	2055500	0	537330
P49327	P49327	60	60	60	Fatty acid synthase;[Acyl-carrier-protein] S-acetyltransferase;[Acyl-carrier-protein] S-malonyltransferase;3-oxoacyl-[acyl-carrier-protein] synthase;3-oxoacyl-[acyl-carrier-protein] reductase;3-hydroxyacyl-[acyl-carrier-protein] dehydratase;Enoyl-[acyl-carrier-protein] reductase;Oleoyl-[acyl-carrier-protein] hydrolase	FASN		1	60	60	60	46	46	43	41	41	40	46	46	43	41	41	40	46	46	43	41	41	40	31.3	31.3	31.3	273.42	2511	2511	0	304.07	23.6	24.1	23.7	23.1	21.7	21.2	1669500000	419490000	348470000	286220000	219050000	189600000
P49368	P49368	20	20	20	T-complex protein 1 subunit gamma	CCT3		1	20	20	20	11	12	15	14	14	14	11	12	15	14	14	14	11	12	15	14	14	14	41.1	41.1	41.1	60.533	545	545	0	78.573	22	29.7	35.6	31.2	32.5	32.7	720660000	129610000	131110000	122700000	115190000	101750000
P49411	P49411	2	2	2	Elongation factor Tu, mitochondrial	TUFM		1	2	2	2	2	2	2	1	2	2	2	2	2	1	2	2	2	2	2	1	2	2	7.3	7.3	7.3	49.541	452	452	0	7.5454	7.3	7.3	7.3	4.2	7.3	7.3	19955000	4670300	3703400	3974400	1557200	2966800
P49458	P49458	2	2	2	Signal recognition particle 9 kDa protein	SRP9		1	2	2	2	0	1	1	0	1	1	0	1	1	0	1	1	0	1	1	0	1	1	25.6	25.6	25.6	10.112	86	86	0	3.6672	0	12.8	12.8	0	12.8	12.8	8326700	0	1744700	2550000	0	2167500
P49588	P49588	3	3	3	Alanine--tRNA ligase, cytoplasmic	AARS		1	3	3	3	2	1	2	1	1	0	2	1	2	1	1	0	2	1	2	1	1	0	4.5	4.5	4.5	106.81	968	968	0	7.2781	3.2	1.3	2.8	1.4	1.3	0	15955000	4993200	3185700	5750100	0	2026200
P49591	P49591	3	3	3	Serine--tRNA ligase, cytoplasmic	SARS		1	3	3	3	2	3	1	1	1	1	2	3	1	1	1	1	2	3	1	1	1	1	7	7	7	58.777	514	514	0	10.379	5.3	7	2.7	2.7	2.7	2.7	21617000	5539900	6970900	2805700	1968600	2175600
P49721	P49721	2	2	2	Proteasome subunit beta type-2	PSMB2		1	2	2	2	1	0	1	0	1	0	1	0	1	0	1	0	1	0	1	0	1	0	10.4	10.4	10.4	22.836	201	201	0	2.8317	5.5	0	5.5	0	5	0	5958300	2083200	0	1719200	0	2155900
P49756	P49756	1	1	1	RNA-binding protein 25	RBM25		1	1	1	1	1	1	1	1	1	1	1	1	1	1	1	1	1	1	1	1	1	1	1.8	1.8	1.8	100.18	843	843	0	2.6979	1.8	1.8	1.8	1.8	1.8	1.8	18178000	7567300	3105400	2618900	1704200	1494400
P49773	P49773	1	1	1	Histidine triad nucleotide-binding protein 1	HINT1		1	1	1	1	1	1	1	0	0	1	1	1	1	0	0	1	1	1	1	0	0	1	11.1	11.1	11.1	13.802	126	126	0.0085147	1.7393	11.1	11.1	11.1	0	0	11.1	20558000	5861600	5828900	5446200	0	0
P50238	P50238	2	2	2	Cysteine-rich protein 1	CRIP1		1	2	2	2	1	0	0	1	1	2	1	0	0	1	1	2	1	0	0	1	1	2	45.5	45.5	45.5	8.5328	77	77	0	4.5893	36.4	0	0	36.4	36.4	45.5	16518000	3976000	0	0	3340800	3995800
P50395;P31150	P50395	14;4	14;4	14;4	Rab GDP dissociation inhibitor beta	GDI2		2	14	14	14	6	6	6	6	9	6	6	6	6	6	9	6	6	6	6	6	9	6	37.5	37.5	37.5	50.663	445	445;447	0	32.102	17.1	17.1	17.8	19.1	25.4	20.4	130780000	22446000	19821000	24977000	18248000	24579000
P50552	P50552	6	6	6	Vasodilator-stimulated phosphoprotein	VASP		1	6	6	6	1	0	1	3	3	2	1	0	1	3	3	2	1	0	1	3	3	2	18.9	18.9	18.9	39.829	380	380	0	7.9515	2.9	0	2.9	11.1	9.2	5.8	20906000	3883600	0	3626700	3668700	6392100
P50570;Q9UQ16	P50570	2;1	2;1	2;1	Dynamin-2;Dynamin-3	DNM2;DNM3	;	2	2	2	2	2	0	0	0	0	0	2	0	0	0	0	0	2	0	0	0	0	0	3.6	3.6	3.6	98.063	870	870;869	0.0010121	2.1434	3.6	0	0	0	0	0	2574600	2574600	0	0	0	0
P50897	P50897	2	2	2	Palmitoyl-protein thioesterase 1	PPT1		1	2	2	2	2	2	2	1	2	2	2	2	2	1	2	2	2	2	2	1	2	2	10.5	10.5	10.5	34.193	306	306	0	8.4273	10.5	10.5	10.5	4.9	10.5	10.5	39692000	7319000	7980400	5761400	5471600	7101900
P50914	P50914	9	9	9	60S ribosomal protein L14	RPL14		1	9	9	9	8	7	6	6	6	5	8	7	6	6	6	5	8	7	6	6	6	5	41.4	41.4	41.4	23.432	215	215	0	30.4	38.1	34.4	31.2	31.2	28.8	25.6	793270000	197480000	185780000	150880000	81954000	94716000
P50990	P50990	25	25	25	T-complex protein 1 subunit theta	CCT8		1	25	25	25	11	14	11	17	12	16	11	14	11	17	12	16	11	14	11	17	12	16	47.6	47.6	47.6	59.62	548	548	0	88.733	23.4	28.6	24.6	35.6	26.3	30.1	436180000	82457000	75920000	70585000	81527000	57030000
P50991	P50991	21	21	21	T-complex protein 1 subunit delta	CCT4		1	21	21	21	15	11	11	8	11	12	15	11	11	8	11	12	15	11	11	8	11	12	47.3	47.3	47.3	57.924	539	539	0	72.157	38.8	24.1	28.6	23	27.1	33.2	291640000	88893000	66400000	35247000	21179000	42610000
P50995	P50995	17	16	16	Annexin A11	ANXA11		1	17	16	16	13	11	11	11	13	13	12	10	10	10	12	12	12	10	10	10	12	12	35	33.3	33.3	54.389	505	505	0	66.388	28.5	24.8	26.9	25.1	29.3	28.3	579650000	121130000	92052000	100150000	81841000	93220000
P51148;P61020;P20339	P51148	4;1;1	4;1;1	4;1;1	Ras-related protein Rab-5C	RAB5C		3	4	4	4	2	3	3	0	1	1	2	3	3	0	1	1	2	3	3	0	1	1	25.9	25.9	25.9	23.482	216	216;215;215	0	9.1069	12	20.8	17.1	0	5.6	5.6	24781000	5670900	5750600	8751700	0	2199300
P51149	P51149	9	9	9	Ras-related protein Rab-7a	RAB7A		1	9	9	9	7	7	5	4	6	5	7	7	5	4	6	5	7	7	5	4	6	5	57	57	57	23.489	207	207	0	49.557	44.9	43.5	32.4	28	40.6	33.8	207630000	69223000	44134000	42857000	10630000	21929000
P51153	P51153	2	1	1	Ras-related protein Rab-13	RAB13		1	2	1	1	2	1	1	0	0	1	1	1	1	0	0	0	1	1	1	0	0	0	10.8	5.4	5.4	22.774	203	203	0.0009901	2.0022	10.8	5.4	5.4	0	0	5.4	4782000	1620700	1662400	1498900	0	0
P51659	P51659	2	2	2	Peroxisomal multifunctional enzyme type 2;(3R)-hydroxyacyl-CoA dehydrogenase;Enoyl-CoA hydratase 2	HSD17B4		1	2	2	2	1	0	2	0	0	0	1	0	2	0	0	0	1	0	2	0	0	0	3.3	3.3	3.3	79.685	736	736	0.00098619	1.9835	1.2	0	3.3	0	0	0	2855600	1049000	0	1806600	0	0
P52209	P52209	7	7	7	6-phosphogluconate dehydrogenase, decarboxylating	PGD		1	7	7	7	4	4	5	4	4	5	4	4	5	4	4	5	4	4	5	4	4	5	20.7	20.7	20.7	53.139	483	483	0	21.636	15.1	15.1	13.7	12	12	14.1	127660000	32017000	21698000	24367000	18007000	15247000
P52272	P52272	3	3	3	Heterogeneous nuclear ribonucleoprotein M	HNRNPM		1	3	3	3	1	2	2	0	1	2	1	2	2	0	1	2	1	2	2	0	1	2	4.7	4.7	4.7	77.515	730	730	0	12.619	2.2	3.3	3.6	0	2.2	3.6	25010000	4605100	5569900	7439400	0	3350400
P52292	P52292	2	2	2	Importin subunit alpha-1	KPNA2		1	2	2	2	1	0	1	0	0	1	1	0	1	0	0	1	1	0	1	0	0	1	7.2	7.2	7.2	57.861	529	529	0	3.3934	3.4	0	3.8	0	0	3.4	3860400	1689700	0	951950	0	0
P52565	P52565	3	3	3	Rho GDP-dissociation inhibitor 1	ARHGDIA		1	3	3	3	2	2	2	1	2	1	2	2	2	1	2	1	2	2	2	1	2	1	15.7	15.7	15.7	23.207	204	204	0	16.688	15.7	15.2	15.2	7.4	15.7	7.4	86066000	17416000	15312000	16363000	12077000	10753000
P52597	P52597	3	1	1	Heterogeneous nuclear ribonucleoprotein F;Heterogeneous nuclear ribonucleoprotein F, N-terminally processed	HNRNPF		1	3	1	1	2	3	2	2	1	1	0	1	0	1	0	0	0	1	0	1	0	0	10.6	4.1	4.1	45.671	415	415	0.00099404	2.0219	6.5	10.6	6.5	6.5	2.4	2.4	8806200	0	4263400	0	4542800	0
P52907	P52907	6	6	5	F-actin-capping protein subunit alpha-1	CAPZA1		1	6	6	5	5	4	4	4	5	5	5	4	4	4	5	5	4	3	4	3	4	4	32.5	32.5	29	32.922	286	286	0	17.783	27.3	22	24.1	22.4	25.5	27.6	89840000	18016000	15537000	13046000	13031000	12873000
P52943	P52943	3	3	3	Cysteine-rich protein 2	CRIP2		1	3	3	3	2	2	1	2	2	3	2	2	1	2	2	3	2	2	1	2	2	3	32.2	32.2	32.2	22.492	208	208	0	8.8187	23.1	23.1	15.4	23.1	23.1	32.2	31363000	6225200	5924600	2891000	5137600	4450000
P53041	P53041	1	1	1	Serine/threonine-protein phosphatase 5	PPP5C		1	1	1	1	1	0	1	1	0	0	1	0	1	1	0	0	1	0	1	1	0	0	2.6	2.6	2.6	56.878	499	499	0.001003	2.1079	2.6	0	2.6	2.6	0	0	3509100	1569000	0	1085000	855190	0
P53396	P53396	16	16	16	ATP-citrate synthase	ACLY		1	16	16	16	11	10	9	8	8	8	11	10	9	8	8	8	11	10	9	8	8	8	18.6	18.6	18.6	120.84	1101	1101	0	38.731	12	12	11.2	8.8	9.4	7.8	150740000	38355000	35395000	28760000	17941000	17687000
P53618	P53618	3	3	3	Coatomer subunit beta	COPB1		1	3	3	3	2	1	0	0	1	2	2	1	0	0	1	2	2	1	0	0	1	2	4.8	4.8	4.8	107.14	953	953	0	6.6402	2.9	1.9	0	0	1	2.9	13389000	5194300	2482300	0	0	1357900
P53621	P53621	11	11	11	Coatomer subunit alpha;Xenin;Proxenin	COPA		1	11	11	11	6	6	6	4	7	8	6	6	6	4	7	8	6	6	6	4	7	8	12.9	12.9	12.9	138.34	1224	1224	0	27.625	6.6	6.9	7.1	5	8.3	10	89867000	12926000	16140000	15318000	10330000	16189000
P53634	P53634	2	2	2	Dipeptidyl peptidase 1;Dipeptidyl peptidase 1 exclusion domain chain;Dipeptidyl peptidase 1 heavy chain;Dipeptidyl peptidase 1 light chain	CTSC		1	2	2	2	2	2	2	1	0	0	2	2	2	1	0	0	2	2	2	1	0	0	6.5	6.5	6.5	51.853	463	463	0	4.9999	6.5	6.5	6.5	2.4	0	0	13018000	4444800	4200500	3801500	571630	0
P53801	P53801	2	2	2	Pituitary tumor-transforming gene 1 protein-interacting protein	PTTG1IP		1	2	2	2	2	1	1	1	1	1	2	1	1	1	1	1	2	1	1	1	1	1	16.7	16.7	16.7	20.324	180	180	0	6.2989	16.7	10	10	10	10	10	29162000	10061000	5160200	4658400	3811000	2490300
P53985	P53985	2	2	2	Monocarboxylate transporter 1	SLC16A1		1	2	2	2	2	2	2	1	1	0	2	2	2	1	1	0	2	2	2	1	1	0	3	3	3	53.944	500	500	0	18.095	3	3	3	3	3	0	74821000	26214000	17816000	19117000	6603300	5069400
P53990	P53990	10	10	10	IST1 homolog	IST1		1	10	10	10	7	7	7	6	8	9	7	7	7	6	8	9	7	7	7	6	8	9	26.9	26.9	26.9	39.75	364	364	0	50.09	20.1	20.6	20.9	18.1	21.4	25	419290000	84746000	65052000	76327000	51904000	65795000
P54136	P54136	9	9	9	Arginine--tRNA ligase, cytoplasmic	RARS		1	9	9	9	4	6	5	2	1	2	4	6	5	2	1	2	4	6	5	2	1	2	15.9	15.9	15.9	75.378	660	660	0	11.615	6.7	10	9.2	3.9	2.3	3.9	56745000	15049000	14843000	10393000	5406900	4104600
P54577	P54577	6	6	6	Tyrosine--tRNA ligase, cytoplasmic;Tyrosine--tRNA ligase, cytoplasmic, N-terminally processed	YARS		1	6	6	6	2	3	4	0	1	1	2	3	4	0	1	1	2	3	4	0	1	1	15.2	15.2	15.2	59.143	528	528	0	7.1037	4.4	6.1	10.8	0	1.9	1.9	21911000	3360100	6489800	8201600	0	1920800
P54578	P54578	3	3	3	Ubiquitin carboxyl-terminal hydrolase 14	USP14		1	3	3	3	1	2	1	0	0	0	1	2	1	0	0	0	1	2	1	0	0	0	6.7	6.7	6.7	56.068	494	494	0	3.3725	2.6	4	2.6	0	0	0	8189700	1453200	4667200	2069400	0	0
P54709	P54709	2	2	2	Sodium/potassium-transporting ATPase subunit beta-3	ATP1B3		1	2	2	2	1	1	1	1	1	1	1	1	1	1	1	1	1	1	1	1	1	1	10.4	10.4	10.4	31.512	279	279	0	4.0987	5.4	5	5	5	5	5	10940000	0	2080200	2339000	2193000	1913100
P54727	P54727	1	1	1	UV excision repair protein RAD23 homolog B	RAD23B		1	1	1	1	0	0	0	0	1	0	0	0	0	0	1	0	0	0	0	0	1	0	3.2	3.2	3.2	43.171	409	409	0.0083799	1.6565	0	0	0	0	3.2	0	787660	0	0	0	0	787660
P54753;P54762;P29322	P54753	7;1;1	3;1;1	3;1;1	Ephrin type-B receptor 3	EPHB3		3	7	3	3	4	5	5	4	5	4	0	1	1	2	2	2	0	1	1	2	2	2	9.8	5.3	5.3	110.33	998	998;984;1005	0	6.943	4.5	6.3	6.3	6.8	7.5	6.2	19680000	0	4344400	3571300	3578600	4881300
P54760	P54760	7	7	3	Ephrin type-B receptor 4	EPHB4		1	7	7	3	7	5	7	5	5	3	7	5	7	5	5	3	3	1	3	3	2	1	8.6	8.6	4.1	108.27	987	987	0	26.081	8.6	6.4	8.6	7.2	7	3.7	110470000	28717000	21074000	24197000	15378000	14827000
P54920	P54920	4	4	4	Alpha-soluble NSF attachment protein	NAPA		1	4	4	4	1	3	4	1	3	3	1	3	4	1	3	3	1	3	4	1	3	3	18	18	18	33.232	295	295	0	8.3778	4.1	12.9	18	4.1	13.6	13.6	33425000	3978600	6880400	9045900	2076800	4707200
P55011	P55011	18	18	18	Solute carrier family 12 member 2	SLC12A2		1	18	18	18	13	14	12	13	13	12	13	14	12	13	13	12	13	14	12	13	13	12	17.6	17.6	17.6	131.45	1212	1212	0	121.96	13.9	14.8	13.3	14.7	14.9	12.5	618580000	152790000	112650000	87974000	95213000	80013000
P55036	P55036	2	2	2	26S proteasome non-ATPase regulatory subunit 4	PSMD4		1	2	2	2	1	0	1	1	0	2	1	0	1	1	0	2	1	0	1	1	0	2	8.8	8.8	8.8	40.736	377	377	0	5.5658	4.8	0	4.8	4	0	8.8	11571000	3157300	0	2999000	1766000	0
P55060	P55060	6	6	6	Exportin-2	CSE1L		1	6	6	6	3	2	2	2	1	1	3	2	2	2	1	1	3	2	2	2	1	1	8.3	8.3	8.3	110.42	971	971	0	9.0074	3.6	2.7	3.2	3.3	1.8	1.8	24297000	7621200	4364700	5361700	3415300	1454900
P55072	P55072	37	37	37	Transitional endoplasmic reticulum ATPase	VCP		1	37	37	37	26	32	27	26	24	25	26	32	27	26	24	25	26	32	27	26	24	25	57.4	57.4	57.4	89.321	806	806	0	193.44	42.2	48.8	44.4	40.6	38.7	42.2	1563400000	347650000	355860000	299590000	201410000	174180000
P55209	P55209	4	4	2	Nucleosome assembly protein 1-like 1	NAP1L1		1	4	4	2	1	2	1	2	2	3	1	2	1	2	2	3	0	1	0	1	0	1	11.8	11.8	9	45.374	391	391	0	8.2664	2.6	7.2	2.6	6.9	2.8	7.2	38123000	7311700	7914300	5260300	6325300	5110500
P55735	P55735	3	3	3	Protein SEC13 homolog	SEC13		1	3	3	3	2	2	1	1	1	1	2	2	1	1	1	1	2	2	1	1	1	1	15.8	15.8	15.8	35.54	322	322	0	9.3852	8.7	12.4	5.3	5.3	5.3	5.3	33060000	7863900	11634000	3706000	3250500	3395600
P55786	P55786	2	2	2	Puromycin-sensitive aminopeptidase	NPEPPS		1	2	2	2	2	1	1	1	0	0	2	1	1	1	0	0	2	1	1	1	0	0	2.7	2.7	2.7	103.28	919	919	0	3.5509	2.7	1.4	1.4	1.3	0	0	8620900	3298200	2428800	2196400	697470	0
P55884	P55884	5	5	5	Eukaryotic translation initiation factor 3 subunit B	EIF3B		1	5	5	5	3	3	1	2	2	3	3	3	1	2	2	3	3	3	1	2	2	3	7.7	7.7	7.7	92.48	814	814	0	6.4504	4.8	4.8	1.1	3.3	2.8	3.9	25546000	5996500	6517800	1129600	2343000	5608700
P56192	P56192	7	7	7	Methionine--tRNA ligase, cytoplasmic	MARS		1	7	7	7	5	3	5	3	4	2	5	3	5	3	4	2	5	3	5	3	4	2	11.6	11.6	11.6	101.11	900	900	0	21.901	7.4	3.7	7.8	4.9	6.1	3.8	60942000	16808000	7222900	14979000	7956500	9624200
P56199	P56199	8	8	8	Integrin alpha-1	ITGA1		1	8	8	8	6	6	4	3	4	5	6	6	4	3	4	5	6	6	4	3	4	5	7.8	7.8	7.8	130.85	1179	1179	0	27.816	6.4	5.2	3.7	3.4	4.6	5.3	98681000	21095000	21405000	14340000	12727000	12873000
P56470	P56470	15	15	15	Galectin-4	LGALS4		1	15	15	15	14	12	12	8	7	7	14	12	12	8	7	7	14	12	12	8	7	7	50.5	50.5	50.5	35.941	323	323	0	200.76	37.8	45.5	34.7	24.8	24.5	22.3	1800600000	588530000	464290000	478370000	95388000	93254000
P56537	P56537	3	3	3	Eukaryotic translation initiation factor 6	EIF6		1	3	3	3	3	3	2	0	2	0	3	3	2	0	2	0	3	3	2	0	2	0	19.6	19.6	19.6	26.599	245	245	0	6.7501	19.6	19.6	13.9	0	9.8	0	38065000	13216000	11883000	5380300	0	7585400
P59998	P59998	3	3	3	Actin-related protein 2/3 complex subunit 4	ARPC4		1	3	3	3	2	0	2	0	1	0	2	0	2	0	1	0	2	0	2	0	1	0	17.9	17.9	17.9	19.667	168	168	0.001046	2.4887	11.3	0	13.1	0	4.8	0	13814000	8002000	0	5811800	0	0
P60033	P60033	5	5	5	CD81 antigen	CD81		1	5	5	5	4	5	3	5	5	5	4	5	3	5	5	5	4	5	3	5	5	5	30.5	30.5	30.5	25.809	236	236	0	109.63	27.5	30.5	19.1	30.5	30.5	30.5	1180700000	257930000	190010000	151310000	231890000	162470000
P60174	P60174	19	19	19	Triosephosphate isomerase	TPI1		1	19	19	19	13	16	14	11	11	13	13	16	14	11	11	13	13	16	14	11	11	13	75.5	75.5	75.5	30.791	286	286	0	102.42	61.2	65.4	72	50	55.6	55.6	917410000	187410000	172210000	173690000	132360000	118590000
P60660;P14649	P60660	8;2	8;2	8;2	Myosin light polypeptide 6	MYL6		2	8	8	8	5	7	6	8	5	6	5	7	6	8	5	6	5	7	6	8	5	6	55.6	55.6	55.6	16.93	151	151;208	0	37.992	37.1	55.6	37.1	55.6	37.1	45	474700000	70822000	90434000	64611000	86545000	76978000
P60709;Q6S8J3;A5A3E0;Q562R1;P0CG38;P0CG39;Q9BYX7	P60709	28;10;9;8;8;6;4	28;10;9;8;8;6;4	1;0;0;0;0;0;0	Actin, cytoplasmic 1;Actin, cytoplasmic 1, N-terminally processed	ACTB		7	28	28	1	25	25	24	24	20	23	25	25	24	24	20	23	1	1	1	1	1	1	68.8	68.8	4.5	41.736	375	375;1075;1075;376;1075;1038;375	0	323.31	65.9	66.4	65.1	63.7	52.8	63.5	13903000000	3180500000	2586000000	2142700000	1920600000	2061600000
P60842;Q14240	P60842	12;7	12;7	9;4	Eukaryotic initiation factor 4A-I;Eukaryotic initiation factor 4A-II;Eukaryotic initiation factor 4A-II, N-terminally processed	EIF4A1;EIF4A2	;	2	12	12	9	8	10	7	6	6	6	8	10	7	6	6	6	7	8	5	6	6	6	34	34	27.8	46.153	406	406;407	0	44.071	23.9	30	16.7	17.7	18.7	18.2	143940000	27772000	37802000	29227000	14692000	15754000
P60866	P60866	5	5	5	40S ribosomal protein S20	RPS20		1	5	5	5	5	4	5	3	4	3	5	4	5	3	4	3	5	4	5	3	4	3	31.1	31.1	31.1	13.373	119	119	0	42.548	31.1	25.2	31.1	22.7	28.6	22.7	239810000	61120000	46329000	51667000	24853000	29150000
P60900	P60900	9	9	9	Proteasome subunit alpha type-6	PSMA6		1	9	9	9	6	4	5	5	5	5	6	4	5	5	5	5	6	4	5	5	5	5	39	39	39	27.399	246	246	0	22.617	22	17.1	24	25.6	24.8	24.8	233590000	71626000	46948000	44360000	21804000	25716000
P60903	P60903	6	6	6	Protein S100-A10	S100A10		1	6	6	6	4	6	5	3	4	3	4	6	5	3	4	3	4	6	5	3	4	3	49.5	49.5	49.5	11.203	97	97	0	115.28	42.3	49.5	46.4	37.1	40.2	37.1	1374600000	365860000	307840000	175160000	180660000	156920000
P60953	P60953	2	2	2	Cell division control protein 42 homolog	CDC42		1	2	2	2	2	2	2	1	1	2	2	2	2	1	1	2	2	2	2	1	1	2	14.1	14.1	14.1	21.258	191	191	0	7.168	14.1	14.1	14.1	5.2	5.2	14.1	104620000	25884000	17872000	18779000	13753000	12198000
P60981	P60981	5	4	4	Destrin	DSTN		1	5	4	4	4	4	3	3	3	3	3	3	2	3	3	3	3	3	2	3	3	3	30.9	26.7	26.7	18.506	165	165	0	23.799	24.2	24.8	18.2	20.6	20.6	20.6	172020000	59257000	14585000	24862000	23664000	26624000
P60983	P60983	1	1	1	Glia maturation factor beta	GMFB		1	1	1	1	1	0	0	0	0	0	1	0	0	0	0	0	1	0	0	0	0	0	11.3	11.3	11.3	16.713	142	142	0.00097371	1.9234	11.3	0	0	0	0	0	1175200	1175200	0	0	0	0
P61019	P61019	8	8	5	Ras-related protein Rab-2A	RAB2A		1	8	8	5	5	4	4	2	1	1	5	4	4	2	1	1	3	2	2	1	0	0	42	42	24.5	23.545	212	212	0	22.535	21.7	26.4	25.5	9.4	6.1	6.1	36272000	8831200	10690000	10972000	2151100	1655500
P61026;Q9H0U4;Q92928;Q92930;P61006;P59190	P61026	3;1;1;1;1;1	3;1;1;1;1;1	2;0;0;0;0;0	Ras-related protein Rab-10	RAB10		6	3	3	2	3	1	1	1	1	3	3	1	1	1	1	3	2	1	1	1	1	2	17	17	11.5	22.541	200	200;201;201;207;207;212	0	9.6575	17	6	6	6	6	17	70306000	33117000	7829400	7378500	1838600	5805900
P61088;Q5JXB2	P61088	4;1	4;1	4;1	Ubiquitin-conjugating enzyme E2 N	UBE2N		2	4	4	4	4	1	2	0	1	2	4	1	2	0	1	2	4	1	2	0	1	2	37.5	37.5	37.5	17.138	152	152;153	0	9.9836	37.5	13.2	20.4	0	7.2	20.4	29018000	12073000	1588800	3184100	0	5391600
P61106	P61106	2	2	2	Ras-related protein Rab-14	RAB14		1	2	2	2	2	1	1	0	0	1	2	1	1	0	0	1	2	1	1	0	0	1	20.9	20.9	20.9	23.897	215	215	0	9.6253	20.9	7	7	0	0	14	12813000	7283200	1681900	1530300	0	0
P61158	P61158	6	6	6	Actin-related protein 3	ACTR3		1	6	6	6	4	4	2	1	2	1	4	4	2	1	2	1	4	4	2	1	2	1	14.1	14.1	14.1	47.371	418	418	0	12.911	14.1	11.2	4.1	2.6	6	2.6	45767000	17540000	16614000	4197500	1715700	3937800
P61160	P61160	3	3	3	Actin-related protein 2	ACTR2		1	3	3	3	3	1	1	1	2	1	3	1	1	1	2	1	3	1	1	1	2	1	9.1	9.1	9.1	44.76	394	394	0	8.6618	9.1	3.3	3.3	3.3	6.3	3.3	40015000	10031000	6277300	5863100	4013200	7685800
P61163;P42025	P61163	5;2	5;2	5;2	Alpha-centractin	ACTR1A		2	5	5	5	4	2	1	2	2	2	4	2	1	2	2	2	4	2	1	2	2	2	20.2	20.2	20.2	42.613	376	376;376	0	8.9806	15.4	10.4	5.9	10.4	10.6	8	34345000	12069000	4473000	3159200	4716200	3383700
P61221	P61221	2	2	2	ATP-binding cassette sub-family E member 1	ABCE1		1	2	2	2	1	1	0	0	0	1	1	1	0	0	0	1	1	1	0	0	0	1	4.2	4.2	4.2	67.314	599	599	0.0028791	1.8425	1.7	2.5	0	0	0	1.7	5191700	2274300	1976600	0	0	0
P61224;A6NIZ1;P62834	P61224	9;7;6	9;7;6	9;7;6	Ras-related protein Rap-1b;Ras-related protein Rap-1b-like protein;Ras-related protein Rap-1A	RAP1B;RAP1A	;;	3	9	9	9	5	7	6	7	8	6	5	7	6	7	8	6	5	7	6	7	8	6	42.9	42.9	42.9	20.825	184	184;184;184	0	18.897	27.2	31	31	37.5	41.8	31.5	285100000	41322000	50644000	48783000	49045000	48005000
P61225;P10114	P61225	6;3	6;3	3;0	Ras-related protein Rap-2b;Ras-related protein Rap-2a	RAP2B;RAP2A	;	2	6	6	3	6	4	3	3	4	4	6	4	3	3	4	4	3	2	2	1	1	1	28.4	28.4	16.4	20.504	183	183;183	0	11.27	28.4	19.1	21.9	20.2	20.8	19.7	68339000	16625000	10608000	5197300	12457000	13338000
P61247	P61247	10	10	10	40S ribosomal protein S3a	RPS3A		1	10	10	10	8	8	9	8	8	7	8	8	9	8	8	7	8	8	9	8	8	7	41.3	41.3	41.3	29.945	264	264	0	71.251	35.2	33.3	37.9	34.1	34.1	31.1	486270000	149270000	82110000	90330000	61368000	47537000
P61254;Q9UNX3	P61254	11;9	11;9	11;9	60S ribosomal protein L26;60S ribosomal protein L26-like 1	RPL26;RPL26L1	;	2	11	11	11	8	9	10	2	3	4	8	9	10	2	3	4	8	9	10	2	3	4	51.7	51.7	51.7	17.258	145	145;145	0	16.952	35.2	41.4	48.3	11	17.2	26.9	311160000	91052000	83750000	88425000	7223100	20022000
P61289	P61289	2	2	2	Proteasome activator complex subunit 3	PSME3		1	2	2	2	0	2	1	0	0	0	0	2	1	0	0	0	0	2	1	0	0	0	10.2	10.2	10.2	29.506	254	254	0	7.7209	0	10.2	5.9	0	0	0	6810200	0	3641100	3169100	0	0
P61313	P61313	11	11	11	60S ribosomal protein L15	RPL15		1	11	11	11	8	8	9	7	8	7	8	8	9	7	8	7	8	8	9	7	8	7	49	49	49	24.146	204	204	0	70.609	37.7	37.7	44.6	37.7	42.2	37.7	1215100000	323500000	261210000	239610000	140320000	133900000
P61353	P61353	9	9	9	60S ribosomal protein L27	RPL27		1	9	9	9	7	8	7	6	5	5	7	8	7	6	5	5	7	8	7	6	5	5	55.1	55.1	55.1	15.798	136	136	0	28.108	48.5	49.3	41.2	44.1	44.1	38.2	331820000	83331000	81982000	61793000	39412000	36279000
P61421	P61421	2	2	2	V-type proton ATPase subunit d 1	ATP6V0D1		1	2	2	2	0	1	2	0	0	0	0	1	2	0	0	0	0	1	2	0	0	0	7.1	7.1	7.1	40.329	351	351	0	4.1075	0	3.4	7.1	0	0	0	3985600	0	1058200	2927400	0	0
P61513;A6NKH3	P61513	4;1	4;1	4;1	60S ribosomal protein L37a	RPL37A		2	4	4	4	3	4	4	2	3	3	3	4	4	2	3	3	3	4	4	2	3	3	51.1	51.1	51.1	10.275	92	92;93	0	10.203	42.4	51.1	51.1	21.7	31.5	31.5	173710000	34298000	42030000	22446000	12441000	28682000
P61586	P61586	7	7	3	Transforming protein RhoA	RHOA		1	7	7	3	6	6	4	6	6	6	6	6	4	6	6	6	2	3	1	2	2	2	35.8	35.8	17.6	21.768	193	193	0	24.413	30.6	35.2	23.8	30.6	30.6	30.6	249690000	45245000	47617000	33403000	44571000	42314000
P61604	P61604	3	3	3	10 kDa heat shock protein, mitochondrial	HSPE1		1	3	3	3	3	1	1	0	0	0	3	1	1	0	0	0	3	1	1	0	0	0	35.3	35.3	35.3	10.932	102	102	0	5.7849	35.3	13.7	11.8	0	0	0	23047000	15701000	6219800	1126900	0	0
P61626	P61626	8	8	8	Lysozyme C	LYZ		1	8	8	8	6	6	6	5	6	5	6	6	6	5	6	5	6	6	6	5	6	5	57.4	57.4	57.4	16.537	148	148	0	87.216	46.6	52	52	45.9	50.7	46.6	490960000	88200000	123050000	96896000	74861000	51299000
P61764	P61764	1	1	1	Syntaxin-binding protein 1	STXBP1		1	1	1	1	0	1	0	0	0	0	0	1	0	0	0	0	0	1	0	0	0	0	3	3	3	67.568	594	594	0.0010406	2.4699	0	3	0	0	0	0	967080	0	967080	0	0	0
P61769	P61769	4	4	4	Beta-2-microglobulin;Beta-2-microglobulin form pI 5.3	B2M		1	4	4	4	4	4	3	4	2	3	4	4	3	4	2	3	4	4	3	4	2	3	37.8	37.8	37.8	13.714	119	119	0	15.643	37.8	37.8	19.3	37.8	16.8	19.3	490130000	124140000	84188000	41229000	89868000	37906000
P61923	P61923	1	1	1	Coatomer subunit zeta-1	COPZ1		1	1	1	1	1	0	1	1	1	1	1	0	1	1	1	1	1	0	1	1	1	1	7.9	7.9	7.9	20.198	177	177	0	6.3548	7.9	0	7.9	7.9	7.9	7.9	14073000	3905700	0	2459700	2314600	3045800
P61927	P61927	2	2	2	60S ribosomal protein L37	RPL37		1	2	2	2	1	0	0	2	1	0	1	0	0	2	1	0	1	0	0	2	1	0	19.6	19.6	19.6	11.078	97	97	0.0010111	2.1397	9.3	0	0	19.6	9.3	0	39471000	24538000	0	0	7106400	7826400
P61978	P61978	8	8	8	Heterogeneous nuclear ribonucleoprotein K	HNRNPK		1	8	8	8	7	5	8	6	8	7	7	5	8	6	8	7	7	5	8	6	8	7	19.9	19.9	19.9	50.976	463	463	0	37.653	17.9	13.6	19.9	15.3	19.9	17.3	266700000	63385000	49620000	55145000	32840000	31490000
P61981	P61981	11	9	8	14-3-3 protein gamma;14-3-3 protein gamma, N-terminally processed	YWHAG		1	11	9	8	8	6	7	7	9	6	6	4	5	6	8	5	6	4	5	5	7	4	39.3	33.2	29.6	28.302	247	247	0	94.44	31.6	23.5	23.5	28.3	32.4	23.9	380990000	78132000	56015000	64901000	58371000	77883000
P62070	P62070	5	5	3	Ras-related protein R-Ras2	RRAS2		1	5	5	3	2	3	2	3	5	3	2	3	2	3	5	3	1	1	1	2	3	2	28.4	28.4	15.2	23.399	204	204	0	16.552	11.3	19.1	11.3	17.2	28.4	17.2	57271000	9025700	9839800	6685300	6904200	17242000
P62081	P62081	7	7	7	40S ribosomal protein S7	RPS7		1	7	7	7	4	5	4	2	2	0	4	5	4	2	2	0	4	5	4	2	2	0	37.6	37.6	37.6	22.127	194	194	0	10.564	21.6	26.8	27.3	17	16	0	57757000	16810000	19396000	11733000	3369000	6449400
P62136	P62136	11	11	2	Serine/threonine-protein phosphatase PP1-alpha catalytic subunit	PPP1CA		1	11	11	2	7	5	7	4	4	3	7	5	7	4	4	3	1	0	1	1	0	0	36.4	36.4	6.4	37.512	330	330	0	27.437	24.2	20.6	27	14.5	17	11.5	128680000	37848000	25490000	24930000	16099000	16113000
P62140	P62140	11	4	4	Serine/threonine-protein phosphatase PP1-beta catalytic subunit	PPP1CB		1	11	4	4	7	5	5	2	3	2	3	2	1	0	0	0	3	2	1	0	0	0	37.3	15	15	37.186	327	327	0	4.939	23.9	21.1	20.5	7	12.8	7.3	9264200	4926400	2893900	1443900	0	0
P62191	P62191	2	2	2	26S protease regulatory subunit 4	PSMC1		1	2	2	2	2	1	0	1	0	1	2	1	0	1	0	1	2	1	0	1	0	1	9.3	9.3	9.3	49.184	440	440	0	7.5982	9.3	4.8	0	4.5	0	4.5	11380000	4565300	1252300	0	2626100	0
P62195;Q8NB90	P62195	5;1	5;1	5;1	26S protease regulatory subunit 8	PSMC5		2	5	5	5	3	3	3	4	4	4	3	3	3	4	4	4	3	3	3	4	4	4	19.5	19.5	19.5	45.626	406	406;893	0	10.957	10.8	13.3	11.6	14	16.3	14	45794000	7249600	7851300	4331400	7816600	9620200
P62241	P62241	15	15	15	40S ribosomal protein S8	RPS8		1	15	15	15	15	14	14	10	10	13	15	14	14	10	10	13	15	14	14	10	10	13	60.1	60.1	60.1	24.205	208	208	0	86.072	60.1	55.8	59.6	49.5	52.4	59.6	2063200000	562190000	471440000	440880000	193440000	203360000
P62244	P62244	5	5	5	40S ribosomal protein S15a	RPS15A		1	5	5	5	3	0	4	2	2	0	3	0	4	2	2	0	3	0	4	2	2	0	37.7	37.7	37.7	14.839	130	130	0	10.241	24.6	0	30.8	14.6	13.1	0	32721000	9829100	0	14096000	5334400	3460900
P62249	P62249	11	11	11	40S ribosomal protein S16	RPS16		1	11	11	11	9	9	8	5	8	8	9	9	8	5	8	8	9	9	8	5	8	8	63.7	63.7	63.7	16.445	146	146	0	26.918	57.5	48.6	47.3	36.3	52.1	52.1	600480000	156560000	93500000	89698000	82973000	99151000
P62258	P62258	12	10	10	14-3-3 protein epsilon	YWHAE		1	12	10	10	9	10	9	7	9	9	7	8	7	6	8	8	7	8	7	6	8	8	40.4	37.3	37.3	29.174	255	255	0	30.222	36.5	32.2	31.8	25.1	29.4	29.4	364900000	71208000	77029000	47303000	55440000	63373000
P62263	P62263	4	4	4	40S ribosomal protein S14	RPS14		1	4	4	4	4	3	3	3	4	3	4	3	3	3	4	3	4	3	3	3	4	3	24.5	24.5	24.5	16.273	151	151	0	23.336	24.5	24.5	24.5	23.8	24.5	23.8	97091000	22158000	24557000	15884000	11284000	12371000
P62266	P62266	6	6	6	40S ribosomal protein S23	RPS23		1	6	6	6	5	6	6	3	3	4	5	6	6	3	3	4	5	6	6	3	3	4	30.1	30.1	30.1	15.807	143	143	0	15.327	30.1	30.1	30.1	21	21	28.7	247050000	66464000	65621000	57458000	17917000	24241000
P62269	P62269	14	14	14	40S ribosomal protein S18	RPS18		1	14	14	14	13	10	9	9	9	8	13	10	9	9	9	8	13	10	9	9	9	8	58.6	58.6	58.6	17.718	152	152	0	151.22	57.9	47.4	40.8	38.2	38.2	38.2	749180000	178430000	130840000	121540000	100420000	116970000
P62277	P62277	9	9	9	40S ribosomal protein S13	RPS13		1	9	9	9	8	6	7	5	4	4	8	6	7	5	4	4	8	6	7	5	4	4	41.7	41.7	41.7	17.222	151	151	0	23.992	35.8	35.8	37.1	29.8	29.1	29.8	303470000	71921000	44002000	79781000	36859000	36266000
P62280	P62280	7	7	7	40S ribosomal protein S11	RPS11		1	7	7	7	4	5	6	3	3	4	4	5	6	3	3	4	4	5	6	3	3	4	46.2	46.2	46.2	18.431	158	158	0	23.683	27.2	36.7	41.8	17.7	24.7	29.1	344570000	101000000	65304000	79775000	26730000	32460000
P62316	P62316	3	3	3	Small nuclear ribonucleoprotein Sm D2	SNRPD2		1	3	3	3	2	3	3	1	2	1	2	3	3	1	2	1	2	3	3	1	2	1	22	22	22	13.527	118	118	0	11.546	22	22	22	5.9	22	5.9	70295000	17053000	19811000	17233000	4986600	6006400
P62318	P62318	3	3	3	Small nuclear ribonucleoprotein Sm D3	SNRPD3		1	3	3	3	2	2	3	2	2	2	2	2	3	2	2	2	2	2	3	2	2	2	31.7	31.7	31.7	13.916	126	126	0	20.78	24.6	24.6	31.7	24.6	24.6	24.6	95013000	30097000	17708000	20233000	9712400	8755600
P62328	P62328	1	1	1	Thymosin beta-4;Hematopoietic system regulatory peptide	TMSB4X		1	1	1	1	0	0	0	1	1	1	0	0	0	1	1	1	0	0	0	1	1	1	31.8	31.8	31.8	5.0526	44	44	0	5.367	0	0	0	31.8	31.8	31.8	15637000	0	0	0	4440200	5546000
P62333	P62333	5	5	5	26S protease regulatory subunit 10B	PSMC6		1	5	5	5	5	2	4	3	2	3	5	2	4	3	2	3	5	2	4	3	2	3	17	17	17	44.172	389	389	0	14.077	17	6.7	12.9	10	7.2	10.3	47441000	17991000	4200500	9417300	5171300	4865600
P62424	P62424	21	21	21	60S ribosomal protein L7a	RPL7A		1	21	21	21	15	18	15	16	12	14	15	18	15	16	12	14	15	18	15	16	12	14	49.6	49.6	49.6	29.995	266	266	0	127.41	48.9	45.5	42.5	45.5	41	41.4	1826200000	476840000	432400000	364020000	190880000	181480000
P62491;Q15907	P62491	8;8	8;8	8;8	Ras-related protein Rab-11A;Ras-related protein Rab-11B	RAB11A;RAB11B	;	2	8	8	8	6	7	7	4	4	4	6	7	7	4	4	4	6	7	7	4	4	4	41.2	41.2	41.2	24.393	216	216;218	0	19.19	30.6	36.6	36.6	19.4	19.4	19.4	286100000	77671000	64955000	58161000	29032000	26592000
P62633	P62633	1	1	1	Cellular nucleic acid-binding protein	CNBP		1	1	1	1	0	1	0	0	0	1	0	1	0	0	0	1	0	1	0	0	0	1	7.9	7.9	7.9	19.463	177	177	0.0010152	2.164	0	7.9	0	0	0	7.9	2301600	0	1376000	0	0	0
P62701;Q8TD47;P22090	P62701	11;6;6	11;6;6	11;6;6	40S ribosomal protein S4, X isoform;40S ribosomal protein S4, Y isoform 2;40S ribosomal protein S4, Y isoform 1	RPS4X;RPS4Y2;RPS4Y1	;;	3	11	11	11	6	6	7	6	5	7	6	6	7	6	5	7	6	6	7	6	5	7	42.2	42.2	42.2	29.597	263	263;263;263	0	29.275	25.5	25.1	30	24	19.8	28.1	143890000	50571000	27046000	24973000	7851800	15333000
P62750	P62750	5	5	5	60S ribosomal protein L23a	RPL23A		1	5	5	5	5	5	5	3	4	5	5	5	5	3	4	5	5	5	5	3	4	5	28.8	28.8	28.8	17.695	156	156	0	14.606	28.8	28.8	28.8	21.8	21.2	28.8	191120000	63041000	38148000	36034000	16331000	20834000
P62753	P62753	10	10	10	40S ribosomal protein S6	RPS6		1	10	10	10	9	8	10	4	8	5	9	8	10	4	8	5	9	8	10	4	8	5	32.5	32.5	32.5	28.68	249	249	0	42.128	28.9	24.9	32.5	16.5	26.9	21.3	444130000	144630000	71279000	88993000	38094000	56011000
P62805	P62805	16	16	16	Histone H4	HIST1H4A		1	16	16	16	16	12	14	11	12	11	16	12	14	11	12	11	16	12	14	11	12	11	59.2	59.2	59.2	11.367	103	103	0	174.65	59.2	58.3	59.2	57.3	57.3	57.3	23326000000	6006100000	4633300000	4139300000	2879600000	2890000000
P62826	P62826	8	8	8	GTP-binding nuclear protein Ran	RAN		1	8	8	8	7	5	7	5	7	4	7	5	7	5	7	4	7	5	7	5	7	4	30.6	30.6	30.6	24.423	216	216	0	32.003	25.9	19.9	29.6	22.7	29.6	18.1	311470000	86955000	53666000	39714000	47160000	53007000
P62829	P62829	3	3	3	60S ribosomal protein L23	RPL23		1	3	3	3	2	3	2	1	2	1	2	3	2	1	2	1	2	3	2	1	2	1	25.7	25.7	25.7	14.865	140	140	0	11.022	20	25.7	20	14.3	20	14.3	140840000	30844000	34440000	28798000	16577000	15086000
P62841	P62841	3	3	3	40S ribosomal protein S15	RPS15		1	3	3	3	2	2	2	3	3	3	2	2	2	3	3	3	2	2	2	3	3	3	13.8	13.8	13.8	17.04	145	145	0	6.4554	9	9	13.1	13.8	13.8	13.8	110880000	12903000	10576000	14767000	22212000	23971000
P62847	P62847	2	2	2	40S ribosomal protein S24	RPS24		1	2	2	2	2	1	2	1	1	2	2	1	2	1	1	2	2	1	2	1	1	2	20.3	20.3	20.3	15.423	133	133	0	8.3934	20.3	11.3	20.3	11.3	11.3	20.3	26474000	5935900	2890100	4928300	3996600	3091500
P62851	P62851	6	6	6	40S ribosomal protein S25	RPS25		1	6	6	6	4	5	4	5	5	3	4	5	4	5	5	3	4	5	4	5	5	3	31.2	31.2	31.2	13.742	125	125	0	94.548	25.6	25.6	24	25.6	29.6	25.6	386960000	57676000	85753000	68805000	62341000	54272000
P62854;Q5JNZ5	P62854	3;2	3;2	3;2	40S ribosomal protein S26;Putative 40S ribosomal protein S26-like 1	RPS26;RPS26P11	;	2	3	3	3	3	2	3	3	3	3	3	2	3	3	3	3	3	2	3	3	3	3	31.3	31.3	31.3	13.015	115	115;115	0	13.719	31.3	18.3	31.3	31.3	31.3	31.3	344190000	91068000	40290000	76383000	44771000	44599000
P62857	P62857	6	6	6	40S ribosomal protein S28	RPS28		1	6	6	6	6	4	4	5	4	3	6	4	4	5	4	3	6	4	4	5	4	3	56.5	56.5	56.5	7.8409	69	69	0	33.957	56.5	56.5	56.5	56.5	56.5	52.2	417320000	107670000	65171000	62233000	77156000	55959000
P62873;P16520	P62873	14;1	14;1	9;0	Guanine nucleotide-binding protein G(I)/G(S)/G(T) subunit beta-1	GNB1		2	14	14	9	13	12	11	11	10	9	13	12	11	11	10	9	8	7	6	7	7	5	48.5	48.5	34.1	37.377	340	340;340	0	274.18	47.6	43.8	32.9	40.3	37.4	30.9	1502000000	320930000	245440000	246700000	221190000	212270000
P62879;Q9HAV0	P62879	10;5	5;2	5;2	Guanine nucleotide-binding protein G(I)/G(S)/G(T) subunit beta-2;Guanine nucleotide-binding protein subunit beta-4	GNB2;GNB4	;	2	10	5	5	9	10	10	8	8	8	4	5	5	4	5	4	4	5	5	4	5	4	31.8	17.4	17.4	37.331	340	340;340	0	115.45	27.6	31.8	31.8	26.2	26.8	26.2	861310000	119190000	193030000	166340000	146160000	120910000
P62888	P62888	7	7	7	60S ribosomal protein L30	RPL30		1	7	7	7	4	5	6	4	7	6	4	5	6	4	7	6	4	5	6	4	7	6	66.1	66.1	66.1	12.784	115	115	0	57.66	48.7	51.3	59.1	51.3	66.1	59.1	374750000	75458000	81022000	87406000	37395000	48365000
P62899	P62899	5	5	5	60S ribosomal protein L31	RPL31		1	5	5	5	3	4	4	2	2	4	3	4	4	2	2	4	3	4	4	2	2	4	40	40	40	14.463	125	125	0	12.825	24.8	32	32.8	18.4	17.6	32.8	113570000	27775000	26625000	27674000	8229800	5039900
P62906	P62906	12	12	12	60S ribosomal protein L10a	RPL10A		1	12	12	12	10	9	9	8	8	8	10	9	9	8	8	8	10	9	9	8	8	8	52.1	52.1	52.1	24.831	217	217	0	42.803	44.2	42.9	42.4	38.7	38.7	42.9	792410000	202380000	204280000	148530000	87145000	78207000
P62910	P62910	5	5	5	60S ribosomal protein L32	RPL32		1	5	5	5	4	3	3	2	2	3	4	3	3	2	2	3	4	3	3	2	2	3	42.2	42.2	42.2	15.86	135	135	0	17.705	37	24.4	24.4	17	17	22.2	321360000	102710000	71540000	70019000	28700000	15217000
P62913	P62913	9	9	9	60S ribosomal protein L11	RPL11		1	9	9	9	6	5	8	4	6	5	6	5	8	4	6	5	6	5	8	4	6	5	42.1	42.1	42.1	20.252	178	178	0	29.307	29.2	25.3	37.6	23.6	32.6	28.1	684540000	192030000	116450000	131440000	77361000	94962000
P62917	P62917	10	10	10	60S ribosomal protein L8	RPL8		1	10	10	10	8	9	10	8	7	6	8	9	10	8	7	6	8	9	10	8	7	6	36.2	36.2	36.2	28.024	257	257	0	82.674	30.4	36.2	36.2	30.4	30	27.6	729740000	212420000	156240000	136120000	83226000	64928000
P62937;P0DN26;A0A0B4J2A2;A0A075B759;Q9Y536;F5H284;P0DN37	P62937	13;3;3;3;3;3;2	13;3;3;3;3;3;2	13;3;3;3;3;3;2	Peptidyl-prolyl cis-trans isomerase A;Peptidyl-prolyl cis-trans isomerase A, N-terminally processed	PPIA		7	13	13	13	9	12	12	9	9	10	9	12	12	9	9	10	9	12	12	9	9	10	78.8	78.8	78.8	18.012	165	165;164;164;164;164;164;164	0	112.28	63.6	78.8	74.5	43.6	60	64.2	2027700000	397020000	367430000	292400000	365420000	240560000
P62942	P62942	3	3	3	Peptidyl-prolyl cis-trans isomerase FKBP1A	FKBP1A		1	3	3	3	2	2	2	3	2	1	2	2	2	3	2	1	2	2	2	3	2	1	41.7	41.7	41.7	11.951	108	108	0	9.4359	25	25	25	41.7	25	12	51270000	12090000	9526200	8588600	7201300	7904300
P62979;P62987;P0CG47;P0CG48	P62979	10;8;8;8	10;8;8;8	10;8;8;8	Ubiquitin-40S ribosomal protein S27a;Ubiquitin;40S ribosomal protein S27a;Ubiquitin-60S ribosomal protein L40;Ubiquitin;60S ribosomal protein L40;Polyubiquitin-B;Ubiquitin;Polyubiquitin-C;Ubiquitin	RPS27A;UBA52;UBB;UBC	;;;	4	10	10	10	8	9	8	9	6	8	8	9	8	9	6	8	8	9	8	9	6	8	44.2	44.2	44.2	17.965	156	156;128;229;685	0	89.066	44.2	44.2	44.2	44.2	42.9	42.9	2593000000	554220000	482490000	477490000	399170000	292770000
P62993	P62993	4	4	4	Growth factor receptor-bound protein 2	GRB2		1	4	4	4	3	2	2	2	1	1	3	2	2	2	1	1	3	2	2	2	1	1	20.7	20.7	20.7	25.206	217	217	0	7.8993	16.1	9.7	9.7	10.1	5.5	5.5	44247000	13312000	8033300	7508800	6376300	4384300
P62995	P62995	2	2	2	Transformer-2 protein homolog beta	TRA2B		1	2	2	2	2	1	1	1	1	1	2	1	1	1	1	1	2	1	1	1	1	1	12.8	12.8	12.8	33.665	288	288	0	5.7778	12.8	5.6	5.6	5.6	5.6	5.6	20925000	8258200	3565600	3135900	1953400	1882800
P63000;P60763;P15153	P63000	8;4;3	8;4;3	8;4;3	Ras-related C3 botulinum toxin substrate 1;Ras-related C3 botulinum toxin substrate 3	RAC1;RAC3	;	3	8	8	8	7	6	8	7	7	7	7	6	8	7	7	7	7	6	8	7	7	7	39.6	39.6	39.6	21.45	192	192;192;192	0	27.617	35.4	34.9	39.6	35.4	35.4	35.4	423950000	99247000	73011000	83395000	65710000	48154000
P63010;Q10567	P63010	10;5	10;5	10;5	AP-2 complex subunit beta;AP-1 complex subunit beta-1	AP2B1;AP1B1	;	2	10	10	10	6	5	5	1	1	3	6	5	5	1	1	3	6	5	5	1	1	3	11.4	11.4	11.4	104.55	937	937;949	0	19.063	6.7	6.7	5.2	1.2	2.2	4.8	46050000	15213000	8503000	12143000	3049900	1202100
P63092;Q5JWF2;P38405	P63092	13;13;5	13;13;5	12;12;4	Guanine nucleotide-binding protein G(s) subunit alpha isoforms short;Guanine nucleotide-binding protein G(s) subunit alpha isoforms XLas	GNAS	;	3	13	13	12	5	7	6	7	9	6	5	7	6	7	9	6	4	6	5	6	8	5	32	32	29.2	45.664	394	394;1037;381	0	28.748	14.2	19	14.5	22.1	25.1	19.8	336700000	76718000	73662000	52164000	42871000	53150000
P63096	P63096	12	11	6	Guanine nucleotide-binding protein G(i) subunit alpha-1	GNAI1		1	12	11	6	8	9	8	7	8	7	7	8	7	6	7	6	3	3	4	2	3	2	35	31.9	19.2	40.361	354	354	0	53.332	26.3	28	25.1	24	26.8	24	287060000	59288000	49348000	42946000	47022000	41213000
P63104	P63104	15	15	12	14-3-3 protein zeta/delta	YWHAZ		1	15	15	12	10	14	13	9	11	9	10	14	13	9	11	9	7	11	10	7	9	7	65.7	65.7	55.9	27.745	245	245	0	173.03	45.7	62	62	38.4	50.2	46.1	1193400000	259320000	250110000	234080000	161690000	164510000
P63218	P63218	2	2	2	Guanine nucleotide-binding protein G(I)/G(S)/G(O) subunit gamma-5	GNG5		1	2	2	2	0	0	0	0	2	2	0	0	0	0	2	2	0	0	0	0	2	2	23.5	23.5	23.5	7.3184	68	68	0	4.162	0	0	0	0	23.5	23.5	11296000	0	0	0	0	6918800
P63220	P63220	4	4	4	40S ribosomal protein S21	RPS21		1	4	4	4	2	2	2	3	2	3	2	2	2	3	2	3	2	2	2	3	2	3	53	53	53	9.1113	83	83	0	24.18	33.7	33.7	33.7	51.8	33.7	34.9	45704000	8056000	6161600	6048400	8191400	6308100
P63241;Q9GZV4;Q6IS14	P63241	5;3;3	5;3;3	5;3;3	Eukaryotic translation initiation factor 5A-1;Eukaryotic translation initiation factor 5A-2;Eukaryotic translation initiation factor 5A-1-like	EIF5A;EIF5A2;EIF5AL1	;;	3	5	5	5	4	2	3	2	2	3	4	2	3	2	2	3	4	2	3	2	2	3	35.7	35.7	35.7	16.832	154	154;153;154	0	28.137	35.7	18.8	18.8	16.2	16.2	27.9	114460000	28518000	20399000	13609000	15432000	15997000
P63244	P63244	16	16	16	Guanine nucleotide-binding protein subunit beta-2-like 1;Guanine nucleotide-binding protein subunit beta-2-like 1, N-terminally processed	GNB2L1		1	16	16	16	11	13	14	8	9	8	11	13	14	8	9	8	11	13	14	8	9	8	65.9	65.9	65.9	35.076	317	317	0	83.798	47.6	54.9	56.2	36	38.8	35.3	478920000	90203000	120270000	98809000	60912000	57266000
P63261	P63261	28	1	1	Actin, cytoplasmic 2;Actin, cytoplasmic 2, N-terminally processed	ACTG1		1	28	1	1	25	25	24	24	20	23	1	1	1	1	1	1	1	1	1	1	1	1	68.8	4.5	4.5	41.792	375	375	0	20.377	65.9	66.4	65.1	63.7	52.8	63.5	111820000	18716000	25323000	14365000	16995000	19959000
P63313	P63313	3	3	3	Thymosin beta-10	TMSB10		1	3	3	3	1	2	2	2	3	2	1	2	2	2	3	2	1	2	2	2	3	2	63.6	63.6	63.6	5.0256	44	44	0	21.889	31.8	63.6	63.6	63.6	63.6	31.8	88601000	12093000	21272000	21216000	12778000	16973000
P67775;P62714	P67775	2;1	2;1	2;1	Serine/threonine-protein phosphatase 2A catalytic subunit alpha isoform;Serine/threonine-protein phosphatase 2A catalytic subunit beta isoform	PPP2CA;PPP2CB	;	2	2	2	2	1	1	2	1	1	1	1	1	2	1	1	1	1	1	2	1	1	1	7.8	7.8	7.8	35.594	309	309;309	0	5.0958	4.2	4.2	7.8	4.2	4.2	4.2	20230000	4449900	2886600	5375600	2595700	2252400
P67809	P67809	2	2	2	Nuclease-sensitive element-binding protein 1	YBX1		1	2	2	2	1	1	1	1	1	2	1	1	1	1	1	2	1	1	1	1	1	2	13	13	13	35.924	324	324	0	13.402	5.9	5.9	5.9	5.9	5.9	13	34966000	0	0	8972600	7325400	5696100
P67870	P67870	1	1	1	Casein kinase II subunit beta	CSNK2B		1	1	1	1	1	0	0	0	0	0	1	0	0	0	0	0	1	0	0	0	0	0	5.1	5.1	5.1	24.942	215	215	0.006673	1.7882	5.1	0	0	0	0	0	2494600	2494600	0	0	0	0
P68133;P68032;P63267;P62736	P68133	19;19;18;18	1;1;1;1	1;1;1;1	Actin, alpha skeletal muscle;Actin, alpha cardiac muscle 1;Actin, gamma-enteric smooth muscle;Actin, aortic smooth muscle	ACTA1;ACTC1;ACTG2;ACTA2	;;;	4	19	1	1	16	16	15	15	14	15	1	1	1	1	1	1	1	1	1	1	1	1	37.1	4.2	4.2	42.051	377	377;377;376;377	0	14.402	33.2	34.7	32.4	31	29.4	31	779740000	110310000	154090000	121250000	131530000	138000000
P68363;A6NHL2	P68363	17;2	17;2	0;0	Tubulin alpha-1B chain	TUBA1B		2	17	17	0	15	14	13	14	15	14	15	14	13	14	15	14	0	0	0	0	0	0	45.5	45.5	0	50.151	451	451;446	0	126.73	38.4	38.4	34.4	36.1	43.5	36.1	1846300000	393610000	396430000	271010000	279590000	279540000
P68366	P68366	16	3	3	Tubulin alpha-4A chain	TUBA4A		1	16	3	3	13	11	11	13	14	13	2	1	2	3	2	3	2	1	2	3	2	3	42.4	8.7	8.7	49.924	448	448	0	8.0972	33.3	31	29	33	40.4	33	70543000	8347500	5935500	9715600	16801000	12527000
P68371;P04350	P68371	22;16	22;16	4;3	Tubulin beta-4B chain;Tubulin beta-4A chain	TUBB4B;TUBB4A	;	2	22	22	4	18	20	20	18	18	18	18	20	20	18	18	18	4	4	4	4	4	4	63.8	63.8	13	49.83	445	445;444	0	225.64	50.1	57.8	54.4	50.8	52.6	51.7	1767700000	414910000	353440000	324440000	255270000	220460000
P68402	P68402	1	1	1	Platelet-activating factor acetylhydrolase IB subunit beta	PAFAH1B2		1	1	1	1	1	1	1	1	0	1	1	1	1	1	0	1	1	1	1	1	0	1	8.3	8.3	8.3	25.569	229	229	0	9.8392	8.3	8.3	8.3	8.3	0	8.3	16671000	6532000	4009000	2881300	1708900	0
P78310	P78310	3	3	3	Coxsackievirus and adenovirus receptor	CXADR		1	3	3	3	2	0	1	1	1	0	2	0	1	1	1	0	2	0	1	1	1	0	9.3	9.3	9.3	40.029	365	365	0	4.763	6	0	3.6	3.3	3.6	0	12242000	5402000	0	1634700	2876400	2328700
P78362	P78362	1	1	1	SRSF protein kinase 2;SRSF protein kinase 2 N-terminal;SRSF protein kinase 2 C-terminal	SRPK2		1	1	1	1	1	0	0	0	0	0	1	0	0	0	0	0	1	0	0	0	0	0	1.7	1.7	1.7	77.526	688	688	0.00097847	1.9455	1.7	0	0	0	0	0	1368600	1368600	0	0	0	0
P78371	P78371	19	19	19	T-complex protein 1 subunit beta	CCT2		1	19	19	19	15	12	12	10	12	10	15	12	12	10	12	10	15	12	12	10	12	10	46.9	46.9	46.9	57.488	535	535	0	137.16	39.6	33.5	29.2	25.8	29.7	25.8	557770000	131350000	86945000	84586000	89646000	82501000
P78417	P78417	2	2	2	Glutathione S-transferase omega-1	GSTO1		1	2	2	2	1	1	1	0	1	1	1	1	1	0	1	1	1	1	1	0	1	1	10	10	10	27.566	241	241	0	3.1275	5.8	5.8	5.8	0	4.1	4.1	13283000	2397000	2331500	2106900	0	2799000
P78527	P78527	11	11	11	DNA-dependent protein kinase catalytic subunit	PRKDC		1	11	11	11	5	5	2	3	2	3	5	5	2	3	2	3	5	5	2	3	2	3	4	4	4	469.08	4128	4128	0	19.213	1.9	1.7	0.6	1	0.7	1	40872000	12286000	10697000	2105300	5707600	6160500
P80188	P80188	2	2	2	Neutrophil gelatinase-associated lipocalin	LCN2		1	2	2	2	2	0	0	1	0	1	2	0	0	1	0	1	2	0	0	1	0	1	18.2	18.2	18.2	22.588	198	198	0	4.0166	18.2	0	0	7.6	0	7.6	11805000	5257600	0	0	3519900	0
P82933	P82933	1	1	1	28S ribosomal protein S9, mitochondrial	MRPS9		1	1	1	1	1	0	0	0	0	0	1	0	0	0	0	0	1	0	0	0	0	0	4	4	4	45.834	396	396	0.0010549	2.5656	4	0	0	0	0	0	1790800	1790800	0	0	0	0
P83731	P83731	5	5	5	60S ribosomal protein L24	RPL24		1	5	5	5	5	5	4	5	4	4	5	5	4	5	4	4	5	5	4	5	4	4	26.1	26.1	26.1	17.779	157	157	0	11.262	26.1	26.1	17.8	26.1	21	21	157170000	44190000	23574000	16990000	26219000	23221000
P84077;P61204	P84077	1;1	1;1	1;1	ADP-ribosylation factor 1;ADP-ribosylation factor 3	ARF1;ARF3	;	2	1	1	1	1	0	1	0	0	0	1	0	1	0	0	0	1	0	1	0	0	0	7.7	7.7	7.7	20.697	181	181;181	0	2.8474	7.7	0	7.7	0	0	0	4519500	2344600	0	2174900	0	0
P84090	P84090	3	3	3	Enhancer of rudimentary homolog	ERH		1	3	3	3	2	1	2	1	2	2	2	1	2	1	2	2	2	1	2	1	2	2	31.7	31.7	31.7	12.259	104	104	0	12.634	15.4	10.6	15.4	10.6	26.9	26.9	26197000	8710100	3140400	3638500	1728400	4077000
P84095	P84095	5	5	5	Rho-related GTP-binding protein RhoG	RHOG		1	5	5	5	4	3	2	2	2	1	4	3	2	2	2	1	4	3	2	2	2	1	35.6	35.6	35.6	21.308	191	191	0	33.419	35.6	20.9	16.8	20.9	16.8	9.9	29554000	11053000	4833900	3488700	4664400	3786200
P84098	P84098	7	7	7	60S ribosomal protein L19	RPL19		1	7	7	7	6	5	6	4	5	5	6	5	6	4	5	5	6	5	6	4	5	5	28.1	28.1	28.1	23.466	196	196	0	34.654	27.6	23	23.5	22.4	23	23	566100000	149400000	108410000	101440000	64780000	62422000
P84103	P84103	5	5	4	Serine/arginine-rich splicing factor 3	SRSF3		1	5	5	4	4	4	4	3	3	3	4	4	4	3	3	3	3	3	3	2	2	2	28	28	28	19.329	164	164	0	27.729	25	28	28	17.7	17.7	17.7	223130000	51155000	47324000	57695000	21412000	22413000
P84243	P84243	9	1	1	Histone H3.3	H3F3A		1	9	1	1	9	9	9	6	6	7	1	1	1	0	0	0	1	1	1	0	0	0	37.5	7.4	7.4	15.328	136	136	0.0019324	1.8938	37.5	37.5	37.5	27.9	27.9	30.1	16771000	6995900	5045400	4730000	0	0
P98088	P98088	58	58	53	Mucin-5AC	MUC5AC		1	58	58	53	34	37	34	45	48	48	34	37	34	45	48	48	33	36	34	43	45	45	19.8	19.8	18.9	585.56	5654	5654	0	323.31	14.2	15	14	16.5	18	17	2709200000	353420000	292110000	267140000	553640000	637340000
P98160	P98160	121	121	121	Basement membrane-specific heparan sulfate proteoglycan core protein;Endorepellin;LG3 peptide	HSPG2		1	121	121	121	90	92	86	94	98	96	90	92	86	94	98	96	90	92	86	94	98	96	37.9	37.9	37.9	468.83	4391	4391	0	323.31	29.9	30.8	29.4	30.7	31.9	31.2	8754000000	1518800000	1261400000	1128300000	1572300000	1592200000
P98172	P98172	4	4	4	Ephrin-B1	EFNB1		1	4	4	4	4	2	3	1	3	3	4	2	3	1	3	3	4	2	3	1	3	3	20.8	20.8	20.8	38.006	346	346	0	26.686	20.8	14.5	17.6	5.2	17.6	17.6	115470000	32633000	17921000	20871000	7001600	21604000
Q00577	Q00577	1	1	1	Transcriptional activator protein Pur-alpha	PURA		1	1	1	1	1	0	1	0	0	0	1	0	1	0	0	0	1	0	1	0	0	0	8.1	8.1	8.1	34.91	322	322	0.00099701	2.0505	8.1	0	8.1	0	0	0	3494900	1906800	0	1588100	0	0
Q00610;P53675	Q00610	31;6	31;6	31;6	Clathrin heavy chain 1	CLTC		2	31	31	31	18	23	20	16	19	15	18	23	20	16	19	15	18	23	20	16	19	15	23.4	23.4	23.4	191.61	1675	1675;1640	0	181.85	14.7	18.9	16.4	14.3	15.2	12.5	618490000	138090000	134540000	116140000	83061000	78424000
Q00796	Q00796	5	5	5	Sorbitol dehydrogenase	SORD		1	5	5	5	5	2	4	1	1	2	5	2	4	1	1	2	5	2	4	1	1	2	21.3	21.3	21.3	38.324	357	357	0	20.49	21.3	8.4	16.8	5.9	5.6	8.1	68170000	23153000	12956000	17721000	1309600	4215200
Q00839	Q00839	15	15	15	Heterogeneous nuclear ribonucleoprotein U	HNRNPU		1	15	15	15	8	9	10	10	10	7	8	9	10	10	10	7	8	9	10	10	10	7	21	21	21	90.583	825	825	0	116.44	11.9	13.1	13.5	14.4	15.9	11.4	617100000	165250000	123130000	129980000	69662000	74595000
Q01082	Q01082	7	7	7	Spectrin beta chain, non-erythrocytic 1	SPTBN1		1	7	7	7	3	1	2	3	1	3	3	1	2	3	1	3	3	1	2	3	1	3	4.3	4.3	4.3	274.61	2364	2364	0	13.602	1.7	0.5	1.3	1.9	0.4	1.8	22939000	5262200	2452200	3534800	5170700	1765600
Q01105;P0DME0	Q01105	3;3	3;3	3;3	Protein SET;Protein SETSIP	SET;SETSIP	;	2	3	3	3	2	1	2	0	1	0	2	1	2	0	1	0	2	1	2	0	1	0	12.8	12.8	12.8	33.488	290	290;302	0	4.9962	7.9	4.5	9.3	0	4.5	0	14908000	5993700	2340500	5321300	0	1252600
Q01130;Q9BRL6	Q01130	4;1	4;1	4;1	Serine/arginine-rich splicing factor 2	SRSF2		2	4	4	4	2	2	3	2	1	1	2	2	3	2	1	1	2	2	3	2	1	1	21.3	21.3	21.3	25.476	221	221;282	0	31.103	14.9	10.4	18.1	14.9	7.7	7.7	50435000	11562000	10918000	11639000	8137200	3779400
Q01469	Q01469	3	3	3	Fatty acid-binding protein, epidermal	FABP5		1	3	3	3	2	1	2	1	1	0	2	1	2	1	1	0	2	1	2	1	1	0	25.2	25.2	25.2	15.164	135	135	0	4.1149	14.8	6.7	17	6.7	6.7	0	18625000	7312600	2846400	3710200	2759600	1996500
Q01518	Q01518	5	5	5	Adenylyl cyclase-associated protein 1	CAP1		1	5	5	5	5	3	4	3	3	4	5	3	4	3	3	4	5	3	4	3	3	4	17.1	17.1	17.1	51.901	475	475	0	15.622	17.1	8.4	13.7	9.9	9.9	12.2	104500000	21092000	16007000	16854000	17394000	15067000
Q01650	Q01650	3	3	3	Large neutral amino acids transporter small subunit 1	SLC7A5		1	3	3	3	2	3	3	3	1	2	2	3	3	3	1	2	2	3	3	3	1	2	6.7	6.7	6.7	55.01	507	507	0	23.191	3.2	6.7	6.7	6.7	2.8	6.3	85910000	23130000	15840000	19243000	10571000	9781700
Q01813;P17858	Q01813	10;1	10;1	10;1	ATP-dependent 6-phosphofructokinase, platelet type	PFKP		2	10	10	10	8	7	4	2	3	3	8	7	4	2	3	3	8	7	4	2	3	3	16.8	16.8	16.8	85.595	784	784;780	0	20.025	13.1	13.5	8.7	3.6	5.5	6.2	51649000	17321000	14161000	8917300	2475400	3638500
Q01955	Q01955	1	1	1	Collagen alpha-3(IV) chain;Tumstatin	COL4A3		1	1	1	1	0	1	0	0	0	0	0	1	0	0	0	0	0	1	0	0	0	0	0.9	0.9	0.9	161.81	1670	1670	0.0057361	1.8041	0	0.9	0	0	0	0	43334000	0	43334000	0	0	0
Q01970	Q01970	3	3	3	1-phosphatidylinositol 4,5-bisphosphate phosphodiesterase beta-3	PLCB3		1	3	3	3	0	1	0	3	1	2	0	1	0	3	1	2	0	1	0	3	1	2	3.3	3.3	3.3	138.8	1234	1234	0	3.4906	0	1.5	0	3.3	1.1	2.5	15000000	0	2433600	0	6066000	2064400
Q02241	Q02241	4	4	4	Kinesin-like protein KIF23	KIF23		1	4	4	4	2	2	3	2	2	1	2	2	3	2	2	1	2	2	3	2	2	1	6	6	6	110.06	960	960	0	19.149	3.4	2.9	4.4	2.6	3.1	1.2	26771000	4161900	3206900	5867900	5827500	5362100
Q02543	Q02543	8	8	8	60S ribosomal protein L18a	RPL18A		1	8	8	8	6	8	6	5	5	5	6	8	6	5	5	5	6	8	6	5	5	5	38.6	38.6	38.6	20.762	176	176	0	33.206	34.1	38.6	29.5	30.1	30.1	30.1	471460000	98371000	93998000	90820000	60935000	70045000
Q02790	Q02790	4	4	4	Peptidyl-prolyl cis-trans isomerase FKBP4;Peptidyl-prolyl cis-trans isomerase FKBP4, N-terminally processed	FKBP4		1	4	4	4	2	2	3	1	2	2	2	2	3	1	2	2	2	2	3	1	2	2	13.1	13.1	13.1	51.804	459	459	0	8.6273	5.2	5.2	8.1	5	4.8	4.8	28839000	5497300	6796300	6608600	3084200	3805100
Q02809	Q02809	3	3	3	Procollagen-lysine,2-oxoglutarate 5-dioxygenase 1	PLOD1		1	3	3	3	1	0	0	2	1	0	1	0	0	2	1	0	1	0	0	2	1	0	6.9	6.9	6.9	83.549	727	727	0	5.6171	2.2	0	0	4.7	2.5	0	6692400	959210	0	0	3688300	2044900
Q02817	Q02817	3	2	2	Mucin-2	MUC2		1	3	2	2	2	2	1	0	0	2	2	2	1	0	0	1	2	2	1	0	0	1	0.9	0.8	0.8	540.29	5179	5179	0	4.2529	0.8	0.8	0.3	0	0	0.6	12619000	3922400	4316500	1597000	0	0
Q02818	Q02818	1	1	1	Nucleobindin-1	NUCB1		1	1	1	1	1	1	1	0	1	1	1	1	1	0	1	1	1	1	1	0	1	1	2.4	2.4	2.4	53.879	461	461	0.0010132	2.1489	2.4	2.4	2.4	0	2.4	2.4	173070000	46255000	37692000	29967000	0	23843000
Q02878	Q02878	19	19	19	60S ribosomal protein L6	RPL6		1	19	19	19	17	15	14	11	13	11	17	15	14	11	13	11	17	15	14	11	13	11	50.7	50.7	50.7	32.728	288	288	0	77.484	45.1	38.5	31.2	31.2	34.4	31.2	920240000	262620000	219360000	156390000	91593000	108020000
Q03405	Q03405	4	4	4	Urokinase plasminogen activator surface receptor	PLAUR		1	4	4	4	3	1	0	2	3	3	3	1	0	2	3	3	3	1	0	2	3	3	22.4	22.4	22.4	36.978	335	335	0	12.843	17.6	6.3	0	8.4	14.6	14.6	29849000	4961900	1685300	0	5512500	8795800
Q04637	Q04637	1	1	1	Eukaryotic translation initiation factor 4 gamma 1	EIF4G1		1	1	1	1	1	1	1	0	0	0	1	1	1	0	0	0	1	1	1	0	0	0	1.2	1.2	1.2	175.49	1599	1599	0	3.2854	1.2	1.2	1.2	0	0	0	5127700	1726300	1704200	1697100	0	0
Q04760	Q04760	1	1	1	Lactoylglutathione lyase	GLO1		1	1	1	1	0	1	1	1	1	1	0	1	1	1	1	1	0	1	1	1	1	1	9.2	9.2	9.2	20.777	184	184	0	3.4877	0	9.2	9.2	9.2	9.2	9.2	6944800	0	1440400	1650100	1461200	971190
Q04837	Q04837	1	1	1	Single-stranded DNA-binding protein, mitochondrial	SSBP1		1	1	1	1	1	1	1	0	1	0	1	1	1	0	1	0	1	1	1	0	1	0	10.1	10.1	10.1	17.259	148	148	0	9.6071	10.1	10.1	10.1	0	10.1	0	14084000	3979000	4332500	3564900	0	2207100
Q04917	Q04917	6	4	4	14-3-3 protein eta	YWHAH		1	6	4	4	4	4	5	3	2	3	2	2	3	2	1	2	2	2	3	2	1	2	21.5	18.7	18.7	28.218	246	246	0	15.925	15.4	15.4	15.4	15	8.9	8.9	26694000	3828700	3707800	6671200	3976800	3231300
Q05519	Q05519	2	2	2	Serine/arginine-rich splicing factor 11	SRSF11		1	2	2	2	1	2	1	1	1	1	1	2	1	1	1	1	1	2	1	1	1	1	7.9	7.9	7.9	53.542	484	484	0	4.294	3.5	7.9	3.5	3.5	3.5	3.5	17709000	3269500	4702800	3626400	2384700	1957600
Q06210;O94808	Q06210	5;1	5;1	5;1	Glutamine--fructose-6-phosphate aminotransferase [isomerizing] 1	GFPT1		2	5	5	5	5	3	4	2	2	3	5	3	4	2	2	3	5	3	4	2	2	3	12.4	12.4	12.4	78.806	699	699;682	0	15.043	12.4	6.6	9.2	4.7	4.7	7.3	73229000	19728000	17290000	17721000	5161200	7573700
Q06323	Q06323	1	1	1	Proteasome activator complex subunit 1	PSME1		1	1	1	1	1	1	1	1	1	0	1	1	1	1	1	0	1	1	1	1	1	0	5.6	5.6	5.6	28.723	249	249	0.001004	2.1154	5.6	5.6	5.6	5.6	5.6	0	17370000	3866900	4279600	3887200	2410500	2925900
Q06830	Q06830	19	19	15	Peroxiredoxin-1	PRDX1		1	19	19	15	17	14	16	13	14	14	17	14	16	13	14	14	13	10	12	9	10	10	76.9	76.9	61.8	22.11	199	199	0	79.949	76.9	75.4	70.9	74.9	74.9	75.4	1226700000	260860000	256760000	164840000	180510000	181150000
Q07020	Q07020	5	5	5	60S ribosomal protein L18	RPL18		1	5	5	5	5	4	5	4	3	3	5	4	5	4	3	3	5	4	5	4	3	3	19.7	19.7	19.7	21.634	188	188	0	21.122	19.7	19.1	19.7	19.1	18.6	18.6	701050000	208920000	138220000	130850000	80147000	72742000
Q07954	Q07954	2	2	2	Prolow-density lipoprotein receptor-related protein 1;Low-density lipoprotein receptor-related protein 1 85 kDa subunit;Low-density lipoprotein receptor-related protein 1 515 kDa subunit;Low-density lipoprotein receptor-related protein 1 intracellular domain	LRP1		1	2	2	2	2	0	0	1	1	1	2	0	0	1	1	1	2	0	0	1	1	1	0.5	0.5	0.5	504.6	4544	4544	0.00099108	2.009	0.5	0	0	0.3	0.3	0.3	5298500	1314100	0	0	1366100	1132300
Q07955	Q07955	13	13	13	Serine/arginine-rich splicing factor 1	SRSF1		1	13	13	13	10	11	12	4	5	6	10	11	12	4	5	6	10	11	12	4	5	6	45.2	45.2	45.2	27.744	248	248	0	61.027	40.7	42.3	41.5	17.3	21	24.6	366200000	108580000	102330000	81969000	21430000	25751000
Q08174	Q08174	1	1	1	Protocadherin-1	PCDH1		1	1	1	1	0	0	0	1	1	1	0	0	0	1	1	1	0	0	0	1	1	1	1.2	1.2	1.2	114.74	1060	1060	0.0010616	2.6127	0	0	0	1.2	1.2	1.2	4983400	0	0	0	1908000	1521200
Q08209;P16298	Q08209	1;1	1;1	1;1	Serine/threonine-protein phosphatase 2B catalytic subunit alpha isoform;Serine/threonine-protein phosphatase 2B catalytic subunit beta isoform	PPP3CA;PPP3CB	;	2	1	1	1	1	0	0	1	1	1	1	0	0	1	1	1	1	0	0	1	1	1	2.3	2.3	2.3	58.687	521	521;524	0.0028818	1.8551	2.3	0	0	2.3	2.3	2.3	7020700	2682900	0	0	1403400	1318400
Q08211	Q08211	8	8	8	ATP-dependent RNA helicase A	DHX9		1	8	8	8	5	5	4	5	4	3	5	5	4	5	4	3	5	5	4	5	4	3	8.5	8.5	8.5	140.96	1270	1270	0	25.717	4.7	5.1	4	5.7	3.8	3.3	79921000	15775000	18009000	13736000	12844000	10429000
Q08380	Q08380	25	25	25	Galectin-3-binding protein	LGALS3BP		1	25	25	25	20	21	23	23	24	24	20	21	23	23	24	24	20	21	23	23	24	24	46	46	46	65.33	585	585	0	323.31	38.8	38.1	45.8	42.7	43.8	45	16859000000	2175400000	2159300000	1852000000	3667900000	3438500000
Q08431	Q08431	14	14	14	Lactadherin;Lactadherin short form;Medin	MFGE8		1	14	14	14	8	11	9	9	11	11	8	11	9	9	11	11	8	11	9	9	11	11	46.3	46.3	46.3	43.122	387	387	0	60.253	29.7	41.1	33.9	32.8	37.5	38.8	556590000	95818000	94187000	67593000	95538000	96867000
Q08722	Q08722	3	3	3	Leukocyte surface antigen CD47	CD47		1	3	3	3	0	0	1	2	2	2	0	0	1	2	2	2	0	0	1	2	2	2	8.7	8.7	8.7	35.213	323	323	0	3.5138	0	0	2.8	6.2	5.3	6.2	14618000	0	0	2209400	3875100	3391500
Q08945	Q08945	4	4	4	FACT complex subunit SSRP1	SSRP1		1	4	4	4	1	2	3	0	0	1	1	2	3	0	0	1	1	2	3	0	0	1	7.6	7.6	7.6	81.074	709	709	0	7.5771	1.6	4.9	4.7	0	0	2	11666000	1120100	4730800	4308200	0	0
Q09028;Q16576	Q09028	4;2	4;2	4;2	Histone-binding protein RBBP4;Histone-binding protein RBBP7	RBBP4;RBBP7	;	2	4	4	4	3	2	1	1	1	1	3	2	1	1	1	1	3	2	1	1	1	1	13.6	13.6	13.6	47.655	425	425;425	0	11.379	7.3	5.2	6.4	3.3	3.3	3.3	35313000	13851000	6753800	2411700	4748200	3826900
Q09666	Q09666	27	27	27	Neuroblast differentiation-associated protein AHNAK	AHNAK		1	27	27	27	11	11	10	13	8	13	11	11	10	13	8	13	11	11	10	13	8	13	13.1	13.1	13.1	629.09	5890	5890	0	68.319	6	5	4.4	6.9	4.2	7	203880000	40393000	35602000	26607000	38297000	25750000
Q0VGL1	Q0VGL1	1	1	1	Ragulator complex protein LAMTOR4;Ragulator complex protein LAMTOR4, N-terminally processed	LAMTOR4		1	1	1	1	1	1	0	1	0	0	1	1	0	1	0	0	1	1	0	1	0	0	10.1	10.1	10.1	10.741	99	99	0	3.7087	10.1	10.1	0	10.1	0	0	6184200	3083100	2221700	0	879310	0
Q10589	Q10589	2	2	2	Bone marrow stromal antigen 2	BST2		1	2	2	2	2	2	2	2	2	1	2	2	2	2	2	1	2	2	2	2	2	1	12.8	12.8	12.8	19.769	180	180	0	11.042	12.8	12.8	12.8	12.8	12.8	4.4	85018000	15666000	14134000	15044000	15869000	21831000
Q11201	Q11201	4	4	4	CMP-N-acetylneuraminate-beta-galactosamide-alpha-2,3-sialyltransferase 1	ST3GAL1		1	4	4	4	1	0	1	3	4	4	1	0	1	3	4	4	1	0	1	3	4	4	15.6	15.6	15.6	39.075	340	340	0	11.635	3.8	0	4.7	11.8	15.6	15.6	39871000	3049300	0	3867400	11244000	9877000
Q12792	Q12792	2	2	2	Twinfilin-1	TWF1		1	2	2	2	1	1	0	1	0	1	1	1	0	1	0	1	1	1	0	1	0	1	10.6	10.6	10.6	40.282	350	350	0	10.488	5.1	5.1	0	5.4	0	5.4	6072800	2069700	2252800	0	1750200	0
Q12904	Q12904	4	4	4	Aminoacyl tRNA synthase complex-interacting multifunctional protein 1;Endothelial monocyte-activating polypeptide 2	AIMP1		1	4	4	4	3	2	3	3	3	4	3	2	3	3	3	4	3	2	3	3	3	4	19.6	19.6	19.6	34.352	312	312	0	11.56	13.1	9.3	15.7	13.1	13.1	19.6	64646000	11272000	8537600	12294000	10306000	9846300
Q12905	Q12905	5	5	5	Interleukin enhancer-binding factor 2	ILF2		1	5	5	5	5	2	1	1	1	1	5	2	1	1	1	1	5	2	1	1	1	1	15.6	15.6	15.6	43.062	390	390	0	16.486	15.6	8.7	5.1	5.1	5.1	5.1	39333000	19551000	8372700	5202100	2408500	1961000
Q12906	Q12906	7	7	7	Interleukin enhancer-binding factor 3	ILF3		1	7	7	7	4	6	3	1	1	1	4	6	3	1	1	1	4	6	3	1	1	1	9.3	9.3	9.3	95.337	894	894	0	42.494	4.5	8.2	3.9	1.6	1.1	1.6	36002000	9479700	10612000	10957000	2134700	817740
Q12929	Q12929	16	16	16	Epidermal growth factor receptor kinase substrate 8	EPS8		1	16	16	16	6	8	8	13	12	12	6	8	8	13	12	12	6	8	8	13	12	12	27.9	27.9	27.9	91.88	822	822	0	88.165	10.7	15	15.2	24	23.1	19.3	312930000	34047000	39699000	34978000	72359000	68627000
Q13011	Q13011	1	1	1	Delta(3,5)-Delta(2,4)-dienoyl-CoA isomerase, mitochondrial	ECH1		1	1	1	1	1	0	0	0	0	0	1	0	0	0	0	0	1	0	0	0	0	0	4.9	4.9	4.9	35.816	328	328	0.0038351	1.8192	4.9	0	0	0	0	0	1374300	1374300	0	0	0	0
Q13085;O00763	Q13085	3;2	3;2	3;2	Acetyl-CoA carboxylase 1;Biotin carboxylase;Acetyl-CoA carboxylase 2;Biotin carboxylase	ACACA;ACACB	;	2	3	3	3	1	1	3	2	2	1	1	1	3	2	2	1	1	1	3	2	2	1	1.8	1.8	1.8	265.55	2346	2346;2458	0	5.7819	0.7	0.6	1.8	1.2	1.2	0.7	18346000	3670600	1336800	5132000	3252600	2160100
Q13126	Q13126	1	1	1	S-methyl-5-thioadenosine phosphorylase	MTAP		1	1	1	1	1	1	1	1	1	1	1	1	1	1	1	1	1	1	1	1	1	1	6.4	6.4	6.4	31.236	283	283	0	5.5498	6.4	6.4	6.4	6.4	6.4	6.4	26128000	4722200	5254700	5937700	3561300	3260000
Q13155	Q13155	4	4	4	Aminoacyl tRNA synthase complex-interacting multifunctional protein 2	AIMP2		1	4	4	4	4	2	3	2	1	2	4	2	3	2	1	2	4	2	3	2	1	2	19.7	19.7	19.7	35.348	320	320	0	13.81	19.7	9.1	11.9	9.1	5.3	9.1	65617000	19152000	10329000	11458000	10358000	3776600
Q13162	Q13162	4	1	1	Peroxiredoxin-4	PRDX4		1	4	1	1	4	3	3	3	3	3	1	0	0	0	0	0	1	0	0	0	0	0	12.2	5.2	5.2	30.54	271	271	0.0075973	1.7667	12.2	7	7	7	7	7	1130300	1130300	0	0	0	0
Q13185	Q13185	2	2	2	Chromobox protein homolog 3	CBX3		1	2	2	2	1	1	0	1	1	1	1	1	0	1	1	1	1	1	0	1	1	1	14.2	14.2	14.2	20.811	183	183	0	6.2146	7.7	6.6	0	7.7	6.6	7.7	10942000	3219600	0	0	3548000	0
Q13200	Q13200	6	6	6	26S proteasome non-ATPase regulatory subunit 2	PSMD2		1	6	6	6	3	1	5	4	2	3	3	1	5	4	2	3	3	1	5	4	2	3	9	9	9	100.2	908	908	0	22.568	4.8	1.3	6.9	6.9	3.5	4.8	66467000	12254000	4228000	22524000	10316000	6462500
Q13247;Q13243	Q13247	8;1	8;1	5;0	Serine/arginine-rich splicing factor 6	SRSF6		2	8	8	5	4	5	2	3	3	3	4	5	2	3	3	3	3	3	0	1	1	1	22.7	22.7	14.5	39.586	344	344;272	0	12.638	12.5	12.8	4.7	7.3	8.7	8.7	174540000	37358000	53357000	23025000	24732000	19112000
Q13263	Q13263	2	2	2	Transcription intermediary factor 1-beta	TRIM28		1	2	2	2	2	2	2	1	1	1	2	2	2	1	1	1	2	2	2	1	1	1	6.1	6.1	6.1	88.549	835	835	0	18.884	6.1	6.1	6.1	2.4	2.4	2.4	31287000	8118400	8630400	8250000	1625100	2459200
Q13308	Q13308	1	1	1	Inactive tyrosine-protein kinase 7	PTK7		1	1	1	1	1	1	1	0	1	0	1	1	1	0	1	0	1	1	1	0	1	0	2	2	2	118.39	1070	1070	0	3.2938	2	2	2	0	2	0	10090000	3104900	2341900	2454200	0	2189500
Q13310	Q13310	8	2	2	Polyadenylate-binding protein 4	PABPC4		1	8	2	2	7	4	6	4	2	3	1	1	1	0	0	0	1	1	1	0	0	0	16	5	5	70.782	644	644	0	3.2778	12.9	9.3	12.6	7.8	4.8	7.5	6176000	2633100	2607500	935410	0	0
Q13405	Q13405	2	2	2	39S ribosomal protein L49, mitochondrial	MRPL49		1	2	2	2	1	2	0	0	0	0	1	2	0	0	0	0	1	2	0	0	0	0	16.3	16.3	16.3	19.198	166	166	0	6.6318	7.8	16.3	0	0	0	0	3495600	0	3495600	0	0	0
Q13428	Q13428	1	1	1	Treacle protein	TCOF1		1	1	1	1	1	1	1	1	1	1	1	1	1	1	1	1	1	1	1	1	1	1	0.7	0.7	0.7	152.1	1488	1488	0.0010373	2.4528	0.7	0.7	0.7	0.7	0.7	0.7	11834000	2506400	3030700	2791700	946920	1533400
Q13501	Q13501	4	4	4	Sequestosome-1	SQSTM1		1	4	4	4	3	2	2	4	3	3	3	2	2	4	3	3	3	2	2	4	3	3	17.3	17.3	17.3	47.687	440	440	0	31.358	14.8	11.4	11.4	17.3	13.9	13.9	82239000	20059000	12287000	11941000	12595000	11602000
Q13526	Q13526	2	2	2	Peptidyl-prolyl cis-trans isomerase NIMA-interacting 1	PIN1		1	2	2	2	2	2	1	1	0	1	2	2	1	1	0	1	2	2	1	1	0	1	13.5	13.5	13.5	18.243	163	163	0	4.9481	13.5	13.5	13.5	12.3	0	12.3	17257000	5969400	5582100	2781200	1475100	0
Q13547;Q92769	Q13547	1;1	1;1	1;1	Histone deacetylase 1;Histone deacetylase 2	HDAC1;HDAC2	;	2	1	1	1	0	0	1	0	0	0	0	0	1	0	0	0	0	0	1	0	0	0	2.5	2.5	2.5	55.102	482	482;488	0.00097087	1.9153	0	0	2.5	0	0	0	2389400	0	0	2389400	0	0
Q13557;Q9UQM7;Q13555;Q13554	Q13557	6;2;2;2	6;2;2;2	6;2;2;2	Calcium/calmodulin-dependent protein kinase type II subunit delta	CAMK2D		4	6	6	6	3	1	4	2	0	1	3	1	4	2	0	1	3	1	4	2	0	1	18.8	18.8	18.8	56.369	499	499;478;558;666	0	9.5117	11.4	2.4	11.4	4.4	0	2.6	35772000	8586100	4474100	13046000	6875500	0
Q13595	Q13595	2	2	2	Transformer-2 protein homolog alpha	TRA2A		1	2	2	2	1	1	1	0	1	1	1	1	1	0	1	1	1	1	1	0	1	1	8.9	8.9	8.9	32.688	282	282	0	4.0611	3.9	3.9	3.9	0	5	5	10388000	2075000	1889500	1899500	0	2127400
Q13618	Q13618	1	1	1	Cullin-3	CUL3		1	1	1	1	0	1	0	0	0	0	0	1	0	0	0	0	0	1	0	0	0	0	1	1	1	88.929	768	768	1	-2	0	1	0	0	0	0	6255800	0	6255800	0	0	0
Q13765;E9PAV3	Q13765	1;1	1;1	1;1	Nascent polypeptide-associated complex subunit alpha;Nascent polypeptide-associated complex subunit alpha, muscle-specific form	NACA	;	2	1	1	1	1	0	0	1	0	0	1	0	0	1	0	0	1	0	0	1	0	0	7	7	7	23.384	215	215;2078	0.0010482	2.5137	7	0	0	7	0	0	0	0	0	0	0	0
Q13813	Q13813	11	11	11	Spectrin alpha chain, non-erythrocytic 1	SPTAN1		1	11	11	11	5	3	5	3	4	1	5	3	5	3	4	1	5	3	5	3	4	1	5.7	5.7	5.7	284.54	2472	2472	0	20.804	2.3	1.8	3	1.7	2	0.4	32097000	5769600	6670200	7228000	5806400	4973400
Q14008	Q14008	2	2	2	Cytoskeleton-associated protein 5	CKAP5		1	2	2	2	1	0	2	1	0	0	1	0	2	1	0	0	1	0	2	1	0	0	1.1	1.1	1.1	225.49	2032	2032	0.0010299	2.3688	0.5	0	1.1	0.5	0	0	128020000	60798000	0	39781000	27445000	0
Q14028	Q14028	1	1	1	Cyclic nucleotide-gated cation channel beta-1	CNGB1		1	1	1	1	1	0	0	0	0	0	1	0	0	0	0	0	1	0	0	0	0	0	0.9	0.9	0.9	139.68	1251	1251	1	-2	0.9	0	0	0	0	0	20042000	20042000	0	0	0	0
Q14103;O14979	Q14103	5;1	5;1	5;1	Heterogeneous nuclear ribonucleoprotein D0	HNRNPD		2	5	5	5	2	3	2	2	0	2	2	3	2	2	0	2	2	3	2	2	0	2	15.2	15.2	15.2	38.434	355	355;420	0	7.2432	6.8	10.4	8.7	6.8	0	6.8	42826000	13740000	9644500	5769000	7268500	0
Q14108	Q14108	3	3	3	Lysosome membrane protein 2	SCARB2		1	3	3	3	2	3	2	1	0	1	2	3	2	1	0	1	2	3	2	1	0	1	6.9	6.9	6.9	54.29	478	478	0	7.7258	4.8	6.9	4.8	2.7	0	2.7	32225000	9197700	10081000	7118300	2605800	0
Q14152	Q14152	6	6	6	Eukaryotic translation initiation factor 3 subunit A	EIF3A		1	6	6	6	2	3	2	2	1	1	2	3	2	2	1	1	2	3	2	2	1	1	5.7	5.7	5.7	166.57	1382	1382	0	8.1362	2	2.7	2	1.7	0.9	0.9	16221000	3527900	2935100	2186900	4061000	1679500
Q14160	Q14160	7	7	5	Protein scribble homolog	SCRIB		1	7	7	5	4	3	4	3	3	4	4	3	4	3	3	4	3	2	3	2	1	3	6.2	6.2	4.8	174.88	1630	1630	0	17.273	3.7	3.1	3.9	2.7	2.3	3.5	39198000	9133800	6508100	7185800	3484600	5741800
Q14165	Q14165	1	1	1	Malectin	MLEC		1	1	1	1	1	1	0	0	0	1	1	1	0	0	0	1	1	1	0	0	0	1	4.5	4.5	4.5	32.233	292	292	0.0010235	2.2287	4.5	4.5	0	0	0	4.5	5460600	2082300	2373800	0	0	0
Q14197	Q14197	1	1	1	Peptidyl-tRNA hydrolase ICT1, mitochondrial	ICT1		1	1	1	1	1	0	0	0	0	0	1	0	0	0	0	0	1	0	0	0	0	0	5.8	5.8	5.8	23.63	206	206	0.0066794	1.7943	5.8	0	0	0	0	0	1717200	1717200	0	0	0	0
Q14204	Q14204	8	8	8	Cytoplasmic dynein 1 heavy chain 1	DYNC1H1		1	8	8	8	4	3	2	3	0	1	4	3	2	3	0	1	4	3	2	3	0	1	2.2	2.2	2.2	532.4	4646	4646	0	11.761	1.1	0.7	0.5	0.9	0	0.3	16791000	7441500	3496400	2000900	3079700	0
Q14247	Q14247	2	2	2	Src substrate cortactin	CTTN		1	2	2	2	1	0	0	1	0	0	1	0	0	1	0	0	1	0	0	1	0	0	4.9	4.9	4.9	61.585	550	550	0.0019268	1.8732	2.5	0	0	2.4	0	0	4560700	2566900	0	0	1993800	0
Q14254	Q14254	6	6	6	Flotillin-2	FLOT2		1	6	6	6	3	1	3	1	2	2	3	1	3	1	2	2	3	1	3	1	2	2	18.7	18.7	18.7	47.064	428	428	0	15.135	10.7	2.8	9.1	3.3	5.4	6.3	25255000	10155000	1550900	6553200	1592300	3128700
Q14344	Q14344	2	2	2	Guanine nucleotide-binding protein subunit alpha-13	GNA13		1	2	2	2	2	1	0	0	1	0	2	1	0	0	1	0	2	1	0	0	1	0	6.4	6.4	6.4	44.049	377	377	0	3.7788	6.4	2.7	0	0	3.7	0	13001000	6232700	2350300	0	0	4417600
Q14498	Q14498	5	5	5	RNA-binding protein 39	RBM39		1	5	5	5	4	3	2	4	4	2	4	3	2	4	4	2	4	3	2	4	4	2	12.8	12.8	12.8	59.379	530	530	0	19.331	9.6	7.5	6	9.6	11.3	4.9	69477000	20654000	12798000	9366900	10496000	10039000
Q14517	Q14517	13	13	13	Protocadherin Fat 1;Protocadherin Fat 1, nuclear form	FAT1		1	13	13	13	1	2	0	8	5	8	1	2	0	8	5	8	1	2	0	8	5	8	4	4	4	506.27	4588	4588	0	20.86	0.3	0.7	0	2.3	1.5	2.5	42581000	0	3923800	0	13452000	11151000
Q14651;P13797	Q14651	2;1	2;1	2;1	Plastin-1;Plastin-3	PLS1;PLS3	;	2	2	2	2	2	2	1	1	1	1	2	2	1	1	1	1	2	2	1	1	1	1	4	4	4	70.253	629	629;630	0	4.0998	4	4	2.1	2.1	2.1	2.1	16090000	4399700	3465500	2321400	2071000	1596100
Q14697	Q14697	29	29	29	Neutral alpha-glucosidase AB	GANAB		1	29	29	29	19	17	18	23	21	21	19	17	18	23	21	21	19	17	18	23	21	21	29.6	29.6	29.6	106.87	944	944	0	145.42	25.4	23.8	24.6	25.7	24.5	24.8	785100000	130100000	80239000	81737000	173570000	162530000
Q14764	Q14764	47	47	47	Major vault protein	MVP		1	47	47	47	38	37	36	33	34	35	38	37	36	33	34	35	38	37	36	33	34	35	55.1	55.1	55.1	99.326	893	893	0	312.95	49.6	46.5	46.2	40.2	39.6	41.2	3499000000	791080000	677240000	573710000	493910000	432440000
Q14802	Q14802	1	1	1	FXYD domain-containing ion transport regulator 3	FXYD3		1	1	1	1	0	1	1	0	0	0	0	1	1	0	0	0	0	1	1	0	0	0	21.8	21.8	21.8	9.2628	87	87	0	3.7942	0	21.8	21.8	0	0	0	5070300	0	2753300	2317000	0	0
Q14847	Q14847	5	5	5	LIM and SH3 domain protein 1	LASP1		1	5	5	5	3	3	2	1	3	5	3	3	2	1	3	5	3	3	2	1	3	5	19.5	19.5	19.5	29.717	261	261	0	9.981	11.9	11.9	7.3	3.4	11.9	19.5	75093000	20885000	12194000	9685800	6741600	10303000
Q14974	Q14974	5	5	5	Importin subunit beta-1	KPNB1		1	5	5	5	3	3	3	2	2	1	3	3	3	2	2	1	3	3	3	2	2	1	7.1	7.1	7.1	97.169	876	876	0	15.64	4.3	4.6	3.5	2.7	2.7	1	38879000	10687000	12136000	6414400	3846400	4431000
Q14978	Q14978	1	1	1	Nucleolar and coiled-body phosphoprotein 1	NOLC1		1	1	1	1	1	1	1	1	1	1	1	1	1	1	1	1	1	1	1	1	1	1	2	2	2	73.602	699	699	0	3.5587	2	2	2	2	2	2	23676000	5949300	4333700	3067100	3436100	4071400
Q14CZ7	Q14CZ7	1	1	1	FAST kinase domain-containing protein 3	FASTKD3		1	1	1	1	1	1	1	1	1	1	1	1	1	1	1	1	1	1	1	1	1	1	1.4	1.4	1.4	75.688	662	662	0.0010309	2.3783	1.4	1.4	1.4	1.4	1.4	1.4	890770000	113420000	112920000	100760000	153490000	228980000
Q15019	Q15019	7	7	7	Septin-2	2018-09-02		1	7	7	7	4	3	4	3	2	2	4	3	4	3	2	2	4	3	4	3	2	2	28.5	28.5	28.5	41.487	361	361	0	21.002	17.7	9.7	16.1	10.2	7.8	5.8	55882000	16490000	8465800	12639000	5200200	9751400
Q15029	Q15029	8	7	7	116 kDa U5 small nuclear ribonucleoprotein component	EFTUD2		1	8	7	7	4	4	3	3	2	1	3	3	3	3	2	1	3	3	3	3	2	1	10	9	9	109.43	972	972	0	13.481	5.2	5.2	4.1	3.5	2.6	1	27355000	7814500	5719300	4900600	4546500	2641200
Q15046	Q15046	5	5	5	Lysine--tRNA ligase	KARS		1	5	5	5	1	2	2	2	2	2	1	2	2	2	2	2	1	2	2	2	2	2	12.4	12.4	12.4	68.047	597	597	0	12.005	3.7	4.5	4.5	5	4.2	3.9	31417000	3138000	6493800	11511000	5622200	2500400
Q15050	Q15050	3	3	3	Ribosome biogenesis regulatory protein homolog	RRS1		1	3	3	3	2	1	2	0	0	0	2	1	2	0	0	0	2	1	2	0	0	0	13.2	13.2	13.2	41.193	365	365	0	4.383	10.1	4.7	7.7	0	0	0	17595000	5968300	3691700	7935100	0	0
Q15084	Q15084	10	10	10	Protein disulfide-isomerase A6	PDIA6		1	10	10	10	8	8	6	3	4	3	8	8	6	3	4	3	8	8	6	3	4	3	33.6	33.6	33.6	48.121	440	440	0	50.848	33.6	28	21.8	11.8	17.5	11.8	133370000	42627000	41106000	24536000	9157100	11307000
Q15102	Q15102	2	2	2	Platelet-activating factor acetylhydrolase IB subunit gamma	PAFAH1B3		1	2	2	2	2	1	1	0	0	0	2	1	1	0	0	0	2	1	1	0	0	0	13	13	13	25.734	231	231	0	6.4683	13	9.1	9.1	0	0	0	52611000	46564000	3098300	2947900	0	0
Q15149	Q15149	9	9	9	Plectin	PLEC		1	9	9	9	5	6	2	1	1	1	5	6	2	1	1	1	5	6	2	1	1	1	2.6	2.6	2.6	531.78	4684	4684	0	14.004	1.5	1.8	0.7	0.2	0.3	0.3	45287000	32653000	6622700	1477900	795840	1855400
Q15181	Q15181	11	11	11	Inorganic pyrophosphatase	PPA1		1	11	11	11	9	3	5	5	2	5	9	3	5	5	2	5	9	3	5	5	2	5	57.1	57.1	57.1	32.66	289	289	0	34.655	51.2	22.5	24.6	25.3	9	25.3	114500000	44084000	8806800	11181000	26318000	3498900
Q15185	Q15185	3	3	3	Prostaglandin E synthase 3	PTGES3		1	3	3	3	3	2	2	2	2	1	3	2	2	2	2	1	3	2	2	2	2	1	20	20	20	18.697	160	160	0	21.819	20	18.8	18.8	18.8	18.8	10.6	83179000	23382000	16673000	15092000	11746000	11548000
Q15262;P28827	Q15262	9;1	9;1	9;1	Receptor-type tyrosine-protein phosphatase kappa	PTPRK		2	9	9	9	6	4	3	5	4	5	6	4	3	5	4	5	6	4	3	5	4	5	8.3	8.3	8.3	162.1	1439	1439;1452	0	25.959	6.2	4.7	3.3	4.9	3.5	4.1	103030000	33370000	12599000	11272000	17719000	13032000
Q15287	Q15287	3	3	3	RNA-binding protein with serine-rich domain 1	RNPS1		1	3	3	3	1	1	1	3	0	1	1	1	1	3	0	1	1	1	1	3	0	1	10.2	10.2	10.2	34.208	305	305	0	7.9955	4.9	4.9	4.9	10.2	0	4.9	21973000	5170700	5146100	4706600	4719400	0
Q15365	Q15365	8	6	6	Poly(rC)-binding protein 1	PCBP1		1	8	6	6	6	6	6	4	7	5	4	4	4	3	5	3	4	4	4	3	5	3	32.6	23.9	23.9	37.497	356	356	0	25.04	23.9	23.9	23.9	17.7	29.5	19.4	344210000	87506000	68437000	67887000	40986000	44108000
Q15366	Q15366	9	9	5	Poly(rC)-binding protein 2	PCBP2		1	9	9	5	7	7	9	6	7	7	7	7	9	6	7	7	4	4	5	4	4	4	31.8	31.8	17.3	38.58	365	365	0	55.849	29.6	29.6	31.8	26.6	29.6	29.6	995080000	213830000	196690000	209380000	103640000	135590000
Q15393	Q15393	7	7	7	Splicing factor 3B subunit 3	SF3B3		1	7	7	7	6	4	4	1	3	1	6	4	4	1	3	1	6	4	4	1	3	1	8.8	8.8	8.8	135.58	1217	1217	0	26.111	7.6	4.6	4.7	1.4	3.4	1.4	74083000	27833000	17915000	16833000	2389600	6798500
Q15397	Q15397	1	1	1	Pumilio domain-containing protein KIAA0020	KIAA0020		1	1	1	1	0	1	1	0	0	0	0	1	1	0	0	0	0	1	1	0	0	0	2.2	2.2	2.2	73.584	648	648	0.0010215	2.2262	0	2.2	2.2	0	0	0	2602800	0	1305800	1296900	0	0
Q15427	Q15427	1	1	1	Splicing factor 3B subunit 4	SF3B4		1	1	1	1	1	1	1	1	1	1	1	1	1	1	1	1	1	1	1	1	1	1	3.3	3.3	3.3	44.385	424	424	0	6.9195	3.3	3.3	3.3	3.3	3.3	3.3	16834000	2235900	3435100	3302800	2502400	2844200
Q15436;Q15437	Q15436	1;1	1;1	1;1	Protein transport protein Sec23A;Protein transport protein Sec23B	SEC23A;SEC23B	;	2	1	1	1	0	1	0	0	0	1	0	1	0	0	0	1	0	1	0	0	0	1	1.6	1.6	1.6	86.16	765	765;767	0	3.8799	0	1.6	0	0	0	1.6	5057100	0	3488300	0	0	0
Q15599	Q15599	3	3	3	Na(+)/H(+) exchange regulatory cofactor NHE-RF2	SLC9A3R2		1	3	3	3	0	2	0	2	1	1	0	2	0	2	1	1	0	2	0	2	1	1	11.9	11.9	11.9	37.413	337	337	0	5.4501	0	8	0	7.7	4.2	3.9	7751200	0	2664800	0	3078400	428180
Q15691	Q15691	1	1	1	Microtubule-associated protein RP/EB family member 1	MAPRE1		1	1	1	1	0	1	1	0	0	0	0	1	1	0	0	0	0	1	1	0	0	0	6	6	6	29.999	268	268	0	3.1044	0	6	6	0	0	0	3716400	0	1754500	1961900	0	0
Q15738	Q15738	1	1	1	Sterol-4-alpha-carboxylate 3-dehydrogenase, decarboxylating	NSDHL		1	1	1	1	1	1	0	0	1	0	1	1	0	0	1	0	1	1	0	0	1	0	5.1	5.1	5.1	41.9	373	373	0	3.6985	5.1	5.1	0	0	5.1	0	5052700	2256400	1805600	0	0	990710
Q15758	Q15758	12	12	12	Neutral amino acid transporter B(0)	SLC1A5		1	12	12	12	8	9	9	8	8	9	8	9	9	8	8	9	8	9	9	8	8	9	23.3	23.3	23.3	56.598	541	541	0	50.231	18.7	23.3	19.6	16.6	18.3	21.8	473620000	67025000	69947000	76431000	85211000	84724000
Q15819;Q13404	Q15819	1;1	1;1	1;1	Ubiquitin-conjugating enzyme E2 variant 2;Ubiquitin-conjugating enzyme E2 variant 1	UBE2V2;UBE2V1	;	2	1	1	1	0	1	0	0	1	0	0	1	0	0	1	0	0	1	0	0	1	0	6.9	6.9	6.9	16.363	145	145;147	0.001	2.0737	0	6.9	0	0	6.9	0	6362600	0	2798300	0	0	3564300
Q15833	Q15833	3	3	3	Syntaxin-binding protein 2	STXBP2		1	3	3	3	2	2	1	0	0	1	2	2	1	0	0	1	2	2	1	0	0	1	9.8	9.8	9.8	66.452	593	593	0	5.6663	6.4	6.7	3	0	0	3	10647000	4067200	4697500	1160100	0	0
Q15836;P63027	Q15836	2;2	2;2	2;2	Vesicle-associated membrane protein 3;Vesicle-associated membrane protein 2	VAMP3;VAMP2	;	2	2	2	2	1	2	1	0	1	1	1	2	1	0	1	1	1	2	1	0	1	1	24	24	24	11.309	100	100;116	0	7.5053	24	24	24	0	24	24	22127000	5122000	8408600	3831400	0	2137700
Q16181;Q6ZU15	Q16181	3;1	3;1	3;1	Septin-7	2018-09-07		2	3	3	3	2	2	1	3	1	2	2	2	1	3	1	2	2	2	1	3	1	2	6.4	6.4	6.4	50.679	437	437;432	0	4.1882	4.3	4.3	2.1	6.4	2.3	4.3	35948000	10715000	7073300	4268800	6855700	2364100
Q16531	Q16531	1	1	1	DNA damage-binding protein 1	DDB1		1	1	1	1	1	1	0	1	0	0	1	1	0	1	0	0	1	1	0	1	0	0	1.6	1.6	1.6	126.97	1140	1140	0.0010225	2.2287	1.6	1.6	0	1.6	0	0	3791300	1374800	1519800	0	896740	0
Q16555	Q16555	1	1	1	Dihydropyrimidinase-related protein 2	DPYSL2		1	1	1	1	1	1	1	0	0	0	1	1	1	0	0	0	1	1	1	0	0	0	2.8	2.8	2.8	62.293	572	572	0.0010449	2.4868	2.8	2.8	2.8	0	0	0	6491000	2489400	2070300	1931200	0	0
Q16563	Q16563	1	1	1	Synaptophysin-like protein 1	SYPL1		1	1	1	1	1	0	1	1	1	1	1	0	1	1	1	1	1	0	1	1	1	1	4.2	4.2	4.2	28.565	259	259	0.0010288	2.3683	4.2	0	4.2	4.2	4.2	4.2	8728200	2959100	0	2346800	1097900	1258100
Q16629	Q16629	5	4	4	Serine/arginine-rich splicing factor 7	SRSF7		1	5	4	4	4	3	3	2	3	3	3	2	2	1	2	2	3	2	2	1	2	2	23.1	23.1	23.1	27.366	238	238	0	28.648	19.3	16	16	13	16.8	16	139900000	50861000	34660000	32629000	5875500	6094700
Q16778;P33778;P23527;P06899;Q6DRA6;Q6DN03	Q16778	12;12;12;12;6;6	3;3;3;3;3;3	1;1;1;1;1;1	Histone H2B type 2-E;Histone H2B type 1-B;Histone H2B type 1-O;Histone H2B type 1-J;Putative histone H2B type 2-D;Putative histone H2B type 2-C	HIST2H2BE;HIST1H2BB;HIST1H2BO;HIST1H2BJ;HIST2H2BD;HIST2H2BC	;;;;;	6	12	3	1	12	10	10	9	9	8	3	3	3	2	2	2	1	1	1	0	0	0	67.5	9.5	9.5	13.92	126	126;126;126;126;164;193	0	7.1894	67.5	56.3	56.3	58.7	54.8	52.4	1163100000	261300000	250120000	233640000	129310000	138920000
Q16787	Q16787	2	1	1	Laminin subunit alpha-3	LAMA3		1	2	1	1	1	0	0	0	0	2	1	0	0	0	0	1	1	0	0	0	0	1	1.1	0.7	0.7	366.65	3333	3333	0.0084586	1.7093	0.7	0	0	0	0	1.1	3207900	1465400	0	0	0	0
Q16790	Q16790	2	2	2	Carbonic anhydrase 9	CA9		1	2	2	2	1	1	2	2	2	2	1	1	2	2	2	2	1	1	2	2	2	2	6.5	6.5	6.5	49.697	459	459	0	8.2337	3.3	3.3	6.5	6.5	6.5	6.5	48957000	5317600	3629700	11385000	10193000	8847300
Q16881	Q16881	1	1	1	Thioredoxin reductase 1, cytoplasmic	TXNRD1		1	1	1	1	1	0	1	0	0	0	1	0	1	0	0	0	1	0	1	0	0	0	3.5	3.5	3.5	70.905	649	649	0	5.0308	3.5	0	3.5	0	0	0	4304100	2334400	0	1969700	0	0
Q1KMD3	Q1KMD3	8	8	8	Heterogeneous nuclear ribonucleoprotein U-like protein 2	HNRNPUL2		1	8	8	8	5	4	4	5	4	3	5	4	4	5	4	3	5	4	4	5	4	3	13.1	13.1	13.1	85.104	747	747	0	27.325	9.9	7.1	6.6	8.6	6.8	5	76964000	17481000	17367000	11844000	11407000	9745400
Q29718	Q29718	8	1	0	HLA class I histocompatibility antigen, B-82 alpha chain	HLA-B		1	8	1	0	6	7	5	4	4	3	1	1	0	1	0	0	0	0	0	0	0	0	26.2	3	0	40.421	362	362	0.0010081	2.1298	20.7	21.5	14.9	15.5	14.9	12.4	8657500	2139400	2732100	0	3786000	0
Q32P51;P09651	Q32P51	3;3	2;2	2;2	Heterogeneous nuclear ribonucleoprotein A1-like 2;Heterogeneous nuclear ribonucleoprotein A1;Heterogeneous nuclear ribonucleoprotein A1, N-terminally processed	HNRNPA1L2;HNRNPA1	;	2	3	2	2	1	2	1	1	3	1	1	2	1	1	2	1	1	2	1	1	2	1	8.4	5.6	5.6	34.225	320	320;372	0	2.8	3.1	5.6	2.5	3.1	8.4	3.1	13973000	1880000	3790100	2137500	1751400	3115500
Q3ZCM7	Q3ZCM7	10	2	2	Tubulin beta-8 chain	TUBB8		1	10	2	2	9	10	9	9	9	10	2	2	1	2	2	2	2	2	1	2	2	2	24.5	7.4	7.4	49.775	444	444	0	19.174	22.5	24.5	24.3	22.7	22.7	24.5	235770000	37135000	32200000	23091000	58135000	43409000
Q52LA3	Q52LA3	1	1	1	Protein lin-52 homolog	LIN52		1	1	1	1	0	0	0	1	0	1	0	0	0	1	0	1	0	0	0	1	0	1	6	6	6	13.001	116	116	1	-2	0	0	0	6	0	6	5888500	0	0	0	2564500	0
Q58FF8	Q58FF8	10	1	1	Putative heat shock protein HSP 90-beta 2	HSP90AB2P		1	10	1	1	8	8	9	7	7	6	1	1	1	0	1	0	1	1	1	0	1	0	24.1	4.5	4.5	44.348	381	381	0	4.7082	23.6	23.6	22	16.8	18.4	14.4	13608000	4724000	3443700	3655500	0	1784800
Q5BVD1	Q5BVD1	1	1	1	TPA-induced transmembrane protein	TTMP		1	1	1	1	1	1	0	0	0	0	1	1	0	0	0	0	1	1	0	0	0	0	8.3	8.3	8.3	24.294	217	217	0.001032	2.3893	8.3	8.3	0	0	0	0	2499700	1523200	976480	0	0	0
Q5GFL6	Q5GFL6	3	3	3	von Willebrand factor A domain-containing protein 2	VWA2		1	3	3	3	2	2	1	0	0	0	2	2	1	0	0	0	2	2	1	0	0	0	8.1	8.1	8.1	82.011	755	755	0	7.8018	6.6	4.6	1.5	0	0	0	18915000	10036000	6809900	2069200	0	0
Q5SSJ5	Q5SSJ5	2	2	2	Heterochromatin protein 1-binding protein 3	HP1BP3		1	2	2	2	2	2	2	1	1	2	2	2	2	1	1	2	2	2	2	1	1	2	4.3	4.3	4.3	61.206	553	553	0	8.4979	4.3	4.3	4.3	2	2.4	4.3	41727000	10988000	10154000	12108000	1871900	2299900
Q5TZA2	Q5TZA2	1	1	1	Rootletin	CROCC		1	1	1	1	0	1	0	1	0	1	0	1	0	1	0	1	0	1	0	1	0	1	0.4	0.4	0.4	228.52	2017	2017	0.0010183	2.1732	0	0.4	0	0.4	0	0.4	8613800	0	4427100	0	0	0
Q5VTE0;P68104;Q05639	Q5VTE0	21;21;11	21;21;11	21;21;11	Putative elongation factor 1-alpha-like 3;Elongation factor 1-alpha 1;Elongation factor 1-alpha 2	EEF1A1P5;EEF1A1;EEF1A2	;;	3	21	21	21	18	16	14	13	13	15	18	16	14	13	13	15	18	16	14	13	13	15	44.2	44.2	44.2	50.184	462	462;462;463	0	96.043	38.1	33.1	26.4	31.6	31	37.7	2748200000	677520000	593510000	445530000	335940000	307250000
Q5VW32	Q5VW32	6	6	6	BRO1 domain-containing protein BROX	BROX		1	6	6	6	5	2	3	2	5	4	5	2	3	2	5	4	5	2	3	2	5	4	17	17	17	46.476	411	411	0	26.558	13.4	7.5	11.7	7.5	15.3	11.7	156630000	46442000	19782000	26830000	17354000	23449000
Q6EEV6;P61956;P55854	Q6EEV6	1;1;1	1;1;1	1;1;1	Small ubiquitin-related modifier 4;Small ubiquitin-related modifier 2;Small ubiquitin-related modifier 3	SUMO4;SUMO2;SUMO3	;;	3	1	1	1	1	1	1	1	1	1	1	1	1	1	1	1	1	1	1	1	1	1	12.6	12.6	12.6	10.685	95	95;95;103	0	6.4448	12.6	12.6	12.6	12.6	12.6	12.6	34895000	4894400	5327100	4958100	6933300	6599700
Q6IAA8	Q6IAA8	2	2	2	Ragulator complex protein LAMTOR1	LAMTOR1		1	2	2	2	2	1	1	0	1	1	2	1	1	0	1	1	2	1	1	0	1	1	27.3	27.3	27.3	17.745	161	161	0	3.9682	27.3	8.1	8.1	0	8.1	8.1	14567000	6368400	2418400	2392900	0	1802800
Q6P2Q9	Q6P2Q9	6	6	6	Pre-mRNA-processing-splicing factor 8	PRPF8		1	6	6	6	3	2	3	1	1	3	3	2	3	1	1	3	3	2	3	1	1	3	4.2	4.2	4.2	273.6	2335	2335	0	11.245	2.4	1.5	2.1	0.7	0.8	2	24583000	5619300	4169200	6069700	2243100	1895900
Q6PCB0	Q6PCB0	3	3	3	von Willebrand factor A domain-containing protein 1	VWA1		1	3	3	3	1	1	1	1	2	1	1	1	1	1	2	1	1	1	1	1	2	1	13.9	13.9	13.9	46.804	445	445	0	7.2645	3.6	6.7	6.7	3.6	7.2	3.6	25941000	3907300	4509600	2004100	1395600	9203400
Q6UXI9	Q6UXI9	3	3	3	Nephronectin	NPNT		1	3	3	3	0	0	1	2	2	1	0	0	1	2	2	1	0	0	1	2	2	1	8.1	8.1	8.1	61.906	565	565	0	5.3503	0	0	2.1	5.8	6	3.7	11655000	0	0	1535000	3675100	4289700
Q6XQN6	Q6XQN6	1	1	1	Nicotinate phosphoribosyltransferase	NAPRT		1	1	1	1	1	1	1	0	0	0	1	1	1	0	0	0	1	1	1	0	0	0	3.5	3.5	3.5	57.578	538	538	0	6.1188	3.5	3.5	3.5	0	0	0	5746400	2291000	1859600	1595800	0	0
Q71DI3;Q16695;P68431;Q6NXT2	Q71DI3	10;10;10;6	10;10;10;6	2;2;2;0	Histone H3.2;Histone H3.1t;Histone H3.1;Histone H3.3C	HIST2H3A;HIST3H3;HIST1H3A;H3F3C	;;;	4	10	10	2	9	10	9	7	7	9	9	10	9	7	7	9	1	2	1	1	1	2	37.5	37.5	7.4	15.388	136	136;136;136;135	0	25.367	37.5	37.5	36.8	35.3	35.3	37.5	7299000000	1828200000	1644100000	1229400000	778560000	890500000
Q71U36;Q9BQE3;Q13748;Q6PEY2;Q9NY65	Q71U36	16;14;13;9;8	1;1;1;1;1	1;1;1;1;1	Tubulin alpha-1A chain;Tubulin alpha-1C chain;Tubulin alpha-3C/D chain;Tubulin alpha-3E chain;Tubulin alpha-8 chain	TUBA1A;TUBA1C;TUBA3C;TUBA3E;TUBA8	;;;;	5	16	1	1	14	13	12	13	14	13	1	1	1	1	1	1	1	1	1	1	1	1	45.2	2.9	2.9	50.135	451	451;449;450;450;449	0	2.7182	38.1	38.1	34.1	35.9	43.2	35.9	109160000	22510000	17670000	21677000	16651000	16334000
Q71UI9;P0C0S5	Q71UI9	4;4	2;2	2;2	Histone H2A.V;Histone H2A.Z	H2AFV;H2AFZ	;	2	4	2	2	4	4	4	4	4	4	2	2	2	2	2	2	2	2	2	2	2	2	31.2	18.8	18.8	13.509	128	128;128	0	11.199	31.2	31.2	31.2	31.2	31.2	31.2	306260000	69936000	60360000	55665000	40331000	35914000
Q71UM5;P42677	Q71UM5	2;2	2;2	2;2	40S ribosomal protein S27-like;40S ribosomal protein S27	RPS27L;RPS27	;	2	2	2	2	1	2	2	1	2	2	1	2	2	1	2	2	1	2	2	1	2	2	25	25	25	9.4771	84	84;84	0	5.6152	9.5	25	25	15.5	25	25	48653000	6636300	9920600	9736500	7233300	6051000
Q7KZF4	Q7KZF4	5	5	5	Staphylococcal nuclease domain-containing protein 1	SND1		1	5	5	5	1	1	3	2	0	0	1	1	3	2	0	0	1	1	3	2	0	0	8.7	8.7	8.7	102	910	910	0	7.1605	2.3	1.1	4.9	4.9	0	0	18359000	4745500	932890	9011200	3669800	0
Q7L2H7	Q7L2H7	3	3	3	Eukaryotic translation initiation factor 3 subunit M	EIF3M		1	3	3	3	0	2	2	0	1	1	0	2	2	0	1	1	0	2	2	0	1	1	12.8	12.8	12.8	42.502	374	374	0	7.2717	0	7.5	10.2	0	4.8	5.3	9127400	0	2738200	3859900	0	1212000
Q7L576;Q96F07	Q7L576	4;3	4;3	4;3	Cytoplasmic FMR1-interacting protein 1;Cytoplasmic FMR1-interacting protein 2	CYFIP1;CYFIP2	;	2	4	4	4	3	4	2	1	2	2	3	4	2	1	2	2	3	4	2	1	2	2	3.7	3.7	3.7	145.18	1253	1253;1278	0	8.3951	2.7	3.7	1.8	1	1.9	1.8	26928000	7748100	7670700	3304600	968750	3753200
Q7LBR1	Q7LBR1	3	3	3	Charged multivesicular body protein 1b	CHMP1B		1	3	3	3	2	2	2	2	2	2	2	2	2	2	2	2	2	2	2	2	2	2	12.1	12.1	12.1	22.109	199	199	0	6.9093	8	8.5	8.5	8.5	8.5	8.5	137320000	12411000	41104000	33912000	20400000	29497000
Q7Z2W4	Q7Z2W4	1	1	1	Zinc finger CCCH-type antiviral protein 1	ZC3HAV1		1	1	1	1	1	1	1	1	1	1	1	1	1	1	1	1	1	1	1	1	1	1	2	2	2	101.43	902	902	0	3.6134	2	2	2	2	2	2	11071000	2302800	2220800	2340700	1359200	1328100
Q7Z406	Q7Z406	26	22	22	Myosin-14	MYH14		1	26	22	22	20	17	12	11	11	12	16	13	9	8	9	9	16	13	9	8	9	9	18	15.4	15.4	227.87	1995	1995	0	106.78	14.1	11.8	8.4	8	8.6	8.9	174420000	51419000	40624000	23594000	20329000	19821000
Q7Z7M9	Q7Z7M9	1	1	1	Polypeptide N-acetylgalactosaminyltransferase 5	GALNT5		1	1	1	1	0	0	1	0	0	0	0	0	1	0	0	0	0	0	1	0	0	0	1.4	1.4	1.4	106.26	940	940	0.0028846	1.8576	0	0	1.4	0	0	0	30847000	0	0	30847000	0	0
Q86VE9	Q86VE9	5	5	5	Serine incorporator 5	SERINC5		1	5	5	5	3	3	3	2	3	2	3	3	3	2	3	2	3	3	3	2	3	2	13	13	13	47.009	423	423	0	13.456	9.9	9.9	9.9	5.4	10.4	7.8	164770000	35911000	32496000	35065000	26338000	32277000
Q86VP6	Q86VP6	3	3	3	Cullin-associated NEDD8-dissociated protein 1	CAND1		1	3	3	3	1	3	3	2	1	1	1	3	3	2	1	1	1	3	3	2	1	1	3.3	3.3	3.3	136.37	1230	1230	0	7.0131	1.1	3.3	3.3	2	0.9	0.9	18796000	1904800	7041300	5838900	1782200	1096600
Q86X29	Q86X29	9	9	9	Lipolysis-stimulated lipoprotein receptor	LSR		1	9	9	9	5	2	3	5	5	4	5	2	3	5	5	4	5	2	3	5	5	4	19.7	19.7	19.7	71.438	649	649	0	20.192	13.3	4.5	6.6	9.4	9.9	8.3	108980000	21552000	10388000	14396000	18956000	23997000
Q86XX4	Q86XX4	2	2	2	Extracellular matrix protein FRAS1	FRAS1		1	2	2	2	1	2	1	1	1	1	1	2	1	1	1	1	1	2	1	1	1	1	0.9	0.9	0.9	443.21	4008	4008	0	6.7759	0.4	0.9	0.4	0.4	0.4	0.4	14123000	2441700	5020100	2460900	1352700	1639800
Q8IVN8	Q8IVN8	4	4	4	Somatomedin-B and thrombospondin type-1 domain-containing protein	SBSPON		1	4	4	4	2	2	1	4	4	4	2	2	1	4	4	4	2	2	1	4	4	4	26.1	26.1	26.1	29.61	264	264	0	12.795	15.9	8.7	4.5	26.1	26.1	26.1	65438000	6644600	4109400	1925200	17924000	15247000
Q8IWA5	Q8IWA5	2	2	2	Choline transporter-like protein 2	SLC44A2		1	2	2	2	1	2	0	0	0	0	1	2	0	0	0	0	1	2	0	0	0	0	3.1	3.1	3.1	80.123	706	706	0	5.1105	1.7	3.1	0	0	0	0	22401000	12989000	9411400	0	0	0
Q8IX04	Q8IX04	3	3	3	Ubiquitin-conjugating enzyme E2 variant 3	UEVLD		1	3	3	3	1	1	2	0	1	2	1	1	2	0	1	2	1	1	2	0	1	2	6.6	6.6	6.6	52.263	471	471	0	4.21	2.1	2.1	4.2	0	2.1	4.5	10268000	2046000	2114100	2903600	0	1624400
Q8IYB3	Q8IYB3	6	6	6	Serine/arginine repetitive matrix protein 1	SRRM1		1	6	6	6	4	3	2	1	2	1	4	3	2	1	2	1	4	3	2	1	2	1	12.4	12.4	12.4	102.33	904	904	0	18.343	9.4	7	3.2	1.1	2.4	1.1	44062000	15692000	13413000	7095500	0	5171300
Q8IYT4	Q8IYT4	1	1	1	Katanin p60 ATPase-containing subunit A-like 2	KATNAL2		1	1	1	1	1	1	1	1	1	1	1	1	1	1	1	1	1	1	1	1	1	1	2.2	2.2	2.2	61.252	538	538	0	2.8823	2.2	2.2	2.2	2.2	2.2	2.2	69437000	14882000	13589000	12279000	8106200	9895800
Q8IZ83	Q8IZ83	1	1	1	Aldehyde dehydrogenase family 16 member A1	ALDH16A1		1	1	1	1	1	1	1	1	1	1	1	1	1	1	1	1	1	1	1	1	1	1	2	2	2	85.126	802	802	0.0010493	2.526	2	2	2	2	2	2	12791000	2751400	1783700	1643000	2199700	1969700
Q8IZP0	Q8IZP0	3	3	3	Abl interactor 1	ABI1		1	3	3	3	2	3	1	1	2	0	2	3	1	1	2	0	2	3	1	1	2	0	8.3	8.3	8.3	55.08	508	508	0	7.0937	5.3	8.3	3.1	2.2	5.3	0	24294000	6124500	6687200	3875600	1519200	6088000
Q8IZP2;P50502;Q8NFI4	Q8IZP2	4;4;2	4;4;2	4;4;2	Putative protein FAM10A4;Hsc70-interacting protein;Putative protein FAM10A5	ST13P4;ST13;ST13P5	;;	3	4	4	4	2	2	3	3	2	4	2	2	3	3	2	4	2	2	3	3	2	4	20	20	20	27.406	240	240;369;369	0	9.0034	10	10	12.9	15.8	10	20	41717000	6679100	7627300	6077600	7122500	6293800
Q8N1G4	Q8N1G4	1	1	1	Leucine-rich repeat-containing protein 47	LRRC47		1	1	1	1	1	0	1	0	0	0	1	0	1	0	0	0	1	0	1	0	0	0	2.1	2.1	2.1	63.472	583	583	0.00097276	1.9202	2.1	0	2.1	0	0	0	906860	906860	0	0	0	0
Q8N271	Q8N271	2	2	2	Prominin-2	PROM2		1	2	2	2	1	0	1	0	0	0	1	0	1	0	0	0	1	0	1	0	0	0	3.5	3.5	3.5	91.882	834	834	0.0010504	2.5374	1.7	0	1.8	0	0	0	3257600	1454400	0	1803200	0	0
Q8N5G2	Q8N5G2	1	1	1	Macoilin	TMEM57		1	1	1	1	1	1	1	1	1	1	1	1	1	1	1	1	1	1	1	1	1	1	1.2	1.2	1.2	76.177	664	664	0.0010428	2.4832	1.2	1.2	1.2	1.2	1.2	1.2	991470000	390790000	314310000	19139000	119180000	12609000
Q8N5I2	Q8N5I2	6	6	6	Arrestin domain-containing protein 1	ARRDC1		1	6	6	6	5	2	3	5	5	4	5	2	3	5	5	4	5	2	3	5	5	4	21.2	21.2	21.2	45.981	433	433	0	35.135	14.3	6	8.5	14.3	18.5	15.5	213230000	41199000	25603000	32612000	34158000	39725000
Q8N5N7	Q8N5N7	2	2	2	39S ribosomal protein L50, mitochondrial	MRPL50		1	2	2	2	2	2	0	1	2	0	2	2	0	1	2	0	2	2	0	1	2	0	16.5	16.5	16.5	18.325	158	158	0	3.4698	16.5	16.5	0	9.5	16.5	0	9187500	2987900	3068100	0	1087100	2044400
Q8N9N7	Q8N9N7	2	2	2	Leucine-rich repeat-containing protein 57	LRRC57		1	2	2	2	0	0	1	1	2	1	0	0	1	1	2	1	0	0	1	1	2	1	10.5	10.5	10.5	26.754	239	239	0	2.9637	0	0	5	5	10.5	5	11375000	0	0	2088600	2154700	3869800
Q8NBJ4	Q8NBJ4	1	1	1	Golgi membrane protein 1	GOLM1		1	1	1	1	1	1	1	0	0	0	1	1	1	0	0	0	1	1	1	0	0	0	5	5	5	45.333	401	401	0.0019286	1.8744	5	5	5	0	0	0	4991800	1617300	1713900	1660600	0	0
Q8NBP7	Q8NBP7	2	2	2	Proprotein convertase subtilisin/kexin type 9	PCSK9		1	2	2	2	1	2	0	0	0	0	1	2	0	0	0	0	1	2	0	0	0	0	4.2	4.2	4.2	74.285	692	692	0	4.9965	1.9	4.2	0	0	0	0	11880000	4640700	7239700	0	0	0
Q8NBS9	Q8NBS9	1	1	1	Thioredoxin domain-containing protein 5	TXNDC5		1	1	1	1	1	1	0	0	0	0	1	1	0	0	0	0	1	1	0	0	0	0	4.6	4.6	4.6	47.628	432	432	0	2.8669	4.6	4.6	0	0	0	0	4677200	2379500	2297800	0	0	0
Q8NC51	Q8NC51	1	1	1	Plasminogen activator inhibitor 1 RNA-binding protein	SERBP1		1	1	1	1	1	0	0	0	0	0	1	0	0	0	0	0	1	0	0	0	0	0	3.9	3.9	3.9	44.965	408	408	0.0010352	2.4075	3.9	0	0	0	0	0	1978100	1978100	0	0	0	0
Q8NCR9	Q8NCR9	2	2	2	Clarin-3	CLRN3		1	2	2	2	0	1	0	2	2	1	0	1	0	2	2	1	0	1	0	2	2	1	12.4	12.4	12.4	25.321	226	226	0	3.5554	0	5.8	0	12.4	12.4	6.6	16492000	0	2310700	0	5511700	5156900
Q8NDC0	Q8NDC0	1	1	1	MAPK-interacting and spindle-stabilizing protein-like	MAPK1IP1L		1	1	1	1	0	0	0	1	1	1	0	0	0	1	1	1	0	0	0	1	1	1	6.9	6.9	6.9	24.269	245	245	0	16.571	0	0	0	6.9	6.9	6.9	14245000	0	0	0	5409600	4468800
Q8NEJ9	Q8NEJ9	1	1	1	Neuroguidin	NGDN		1	1	1	1	0	1	1	0	0	0	0	1	1	0	0	0	0	1	1	0	0	0	5.7	5.7	5.7	35.894	315	315	0	3.7752	0	5.7	5.7	0	0	0	3186700	0	1923900	1262800	0	0
Q8NES3	Q8NES3	2	2	2	Beta-1,3-N-acetylglucosaminyltransferase lunatic fringe	LFNG		1	2	2	2	0	1	1	2	1	2	0	1	1	2	1	2	0	1	1	2	1	2	7.7	7.7	7.7	41.773	379	379	0	3.2862	0	2.9	2.9	7.7	2.9	7.7	18242000	0	3935100	3290900	3732100	2465400
Q8NEV1;P68400	Q8NEV1	5;5	5;5	5;5	Casein kinase II subunit alpha 3;Casein kinase II subunit alpha	CSNK2A3;CSNK2A1	;	2	5	5	5	3	4	2	4	3	3	3	4	2	4	3	3	3	4	2	4	3	3	20.2	20.2	20.2	45.219	391	391;391	0	11.376	11.5	16.4	9.7	15.3	11.5	11.5	38145000	5191900	9213200	2914700	9582800	5458600
Q8NFJ5	Q8NFJ5	5	5	5	Retinoic acid-induced protein 3	GPRC5A		1	5	5	5	2	3	2	2	3	3	2	3	2	2	3	3	2	3	2	2	3	3	19.3	19.3	19.3	40.251	357	357	0	18.149	5.6	17.4	6.2	13.4	8.1	9.5	84267000	9207500	25611000	5036700	15507000	10317000
Q8NG11	Q8NG11	4	4	4	Tetraspanin-14	TSPAN14		1	4	4	4	4	3	2	3	3	2	4	3	2	3	3	2	4	3	2	3	3	2	17.8	17.8	17.8	30.69	270	270	0	12.74	17.8	14.1	10.4	13.7	14.1	7.8	113200000	30866000	28474000	14034000	8297900	19016000
Q8NHG7	Q8NHG7	1	1	1	Small VCP/p97-interacting protein	SVIP		1	1	1	1	1	0	0	0	1	1	1	0	0	0	1	1	1	0	0	0	1	1	14.3	14.3	14.3	8.4426	77	77	0.0010638	2.6194	14.3	0	0	0	14.3	14.3	6237100	2793500	0	0	0	1748000
Q8NI27	Q8NI27	1	1	1	THO complex subunit 2	THOC2		1	1	1	1	1	0	1	1	0	1	1	0	1	1	0	1	1	0	1	1	0	1	0.8	0.8	0.8	182.77	1593	1593	0	3.363	0.8	0	0.8	0.8	0	0.8	6783200	1788800	0	1746400	1870000	0
Q8TBK2	Q8TBK2	1	1	1	N-lysine methyltransferase SETD6	SETD6		1	1	1	1	1	1	1	1	1	1	1	1	1	1	1	1	1	1	1	1	1	1	2.5	2.5	2.5	53.188	473	473	0.00097466	1.9338	2.5	2.5	2.5	2.5	2.5	2.5	303080000	104120000	78150000	79938000	9334900	19451000
Q8TDN6	Q8TDN6	3	3	3	Ribosome biogenesis protein BRX1 homolog	BRIX1		1	3	3	3	3	3	1	1	0	1	3	3	1	1	0	1	3	3	1	1	0	1	15.6	15.6	15.6	41.401	353	353	0	13.155	15.6	15.6	3.7	3.7	0	3.7	31055000	12058000	9982100	4943900	1965600	0
Q8TE67	Q8TE67	4	4	4	Epidermal growth factor receptor kinase substrate 8-like protein 3	EPS8L3		1	4	4	4	2	2	1	3	2	2	2	2	1	3	2	2	2	2	1	3	2	2	11.5	11.5	11.5	66.86	593	593	0	17.546	4.9	5.7	3.9	9.6	6.6	6.9	26304000	4219900	3900200	2409100	6182800	5681200
Q8TE68	Q8TE68	7	7	7	Epidermal growth factor receptor kinase substrate 8-like protein 1	EPS8L1		1	7	7	7	3	2	3	5	5	6	3	2	3	5	5	6	3	2	3	5	5	6	15.5	15.5	15.5	80.25	723	723	0	16.126	8.3	4.6	6.2	10.4	10.4	11.8	69190000	8958800	5302000	5776200	15894000	17423000
Q8WUJ3	Q8WUJ3	11	11	11	Cell migration-inducing and hyaluronan-binding protein	CEMIP		1	11	11	11	1	3	1	6	7	7	1	3	1	6	7	7	1	3	1	6	7	7	10.5	10.5	10.5	153	1361	1361	0	22.519	1	2.9	1	5.4	6.9	6.6	68330000	2579800	8099000	2725200	20381000	19718000
Q8WUM4	Q8WUM4	58	58	58	Programmed cell death 6-interacting protein	PDCD6IP		1	58	58	58	40	44	47	40	37	38	40	44	47	40	37	38	40	44	47	40	37	38	62.2	62.2	62.2	96.022	868	868	0	276.91	52.3	52	53.1	49	51.6	50.9	3634000000	696100000	593040000	584210000	552290000	591890000
Q8WUW1	Q8WUW1	2	2	2	Protein BRICK1	BRK1		1	2	2	2	0	0	0	1	1	2	0	0	0	1	1	2	0	0	0	1	1	2	33.3	33.3	33.3	8.7448	75	75	0	2.9661	0	0	0	16	16	33.3	8549500	0	0	0	2430000	2761100
Q8WV92	Q8WV92	3	3	3	MIT domain-containing protein 1	MITD1		1	3	3	3	1	3	2	3	3	3	1	3	2	3	3	3	1	3	2	3	3	3	17.7	17.7	17.7	29.314	249	249	0	37.533	7.6	17.7	13.7	17.7	17.7	17.7	88555000	9076700	22591000	12690000	15939000	13577000
Q8WVM8	Q8WVM8	1	1	1	Sec1 family domain-containing protein 1	SCFD1		1	1	1	1	0	1	0	0	0	0	0	1	0	0	0	0	0	1	0	0	0	0	2.3	2.3	2.3	72.379	642	642	0	3.7018	0	2.3	0	0	0	0	743150	0	743150	0	0	0
Q8WWI5	Q8WWI5	3	3	3	Choline transporter-like protein 1	SLC44A1		1	3	3	3	1	1	2	2	1	1	1	1	2	2	1	1	1	1	2	2	1	1	6.4	6.4	6.4	73.301	657	657	0	5.1907	2.3	2.3	4.3	4.4	2.3	2.3	42886000	8899500	7945700	8505100	6567900	5455800
Q8WXF0;O75494	Q8WXF0	1;1	1;1	1;1	Serine/arginine-rich splicing factor 12;Serine/arginine-rich splicing factor 10	SRSF12;SRSF10	;	2	1	1	1	1	1	1	0	0	0	1	1	1	0	0	0	1	1	1	0	0	0	4.2	4.2	4.2	30.512	261	261;262	0.0038314	1.8157	4.2	4.2	4.2	0	0	0	4258500	1816000	1130100	1312300	0	0
Q92485	Q92485	2	2	2	Acid sphingomyelinase-like phosphodiesterase 3b	SMPDL3B		1	2	2	2	0	1	0	2	1	1	0	1	0	2	1	1	0	1	0	2	1	1	8.6	8.6	8.6	50.813	455	455	0	3.0363	0	5.1	0	8.6	3.5	3.5	8418000	0	2640500	0	3508000	953410
Q92522	Q92522	5	5	5	Histone H1x	H1FX		1	5	5	5	3	3	4	2	1	2	3	3	4	2	1	2	3	3	4	2	1	2	23.5	23.5	23.5	22.487	213	213	0	20.813	17.8	17.8	18.8	12.7	5.6	12.7	100480000	25399000	13456000	44213000	8911600	1965800
Q92526	Q92526	4	1	1	T-complex protein 1 subunit zeta-2	CCT6B		1	4	1	1	2	1	1	2	2	1	1	0	0	0	0	0	1	0	0	0	0	0	7.9	2.3	2.3	57.821	530	530	0	2.8837	3.6	1.3	1.3	4.3	4.3	2.5	12725000	12725000	0	0	0	0
Q92530	Q92530	1	1	1	Proteasome inhibitor PI31 subunit	PSMF1		1	1	1	1	1	1	1	1	1	1	1	1	1	1	1	1	1	1	1	1	1	1	6.3	6.3	6.3	29.816	271	271	0	5.0795	6.3	6.3	6.3	6.3	6.3	6.3	9931700	2491900	2169000	1817100	1606500	1029200
Q92542	Q92542	2	2	2	Nicastrin	NCSTN		1	2	2	2	2	1	2	0	1	1	2	1	2	0	1	1	2	1	2	0	1	1	3.2	3.2	3.2	78.41	709	709	0	3.4628	3.2	1.7	3.2	0	1.7	1.6	9015300	3038600	1599000	2654400	0	1078900
Q92544	Q92544	3	3	3	Transmembrane 9 superfamily member 4	TM9SF4		1	3	3	3	0	2	2	1	0	0	0	2	2	1	0	0	0	2	2	1	0	0	7.3	7.3	7.3	74.518	642	642	0	5.5102	0	5.9	4	2.6	0	0	14156000	0	5331200	5727700	3097300	0
Q92597	Q92597	2	2	2	Protein NDRG1	NDRG1		1	2	2	2	1	1	1	1	0	1	1	1	1	1	0	1	1	1	1	1	0	1	8.1	8.1	8.1	42.835	394	394	0	4.0546	3.8	3.8	3.8	4.3	0	4.3	16596000	5354900	3940200	3336300	1757300	0
Q92598;O95757	Q92598	6;2	6;2	5;1	Heat shock protein 105 kDa	HSPH1		2	6	6	5	5	2	4	1	3	3	5	2	4	1	3	3	4	1	3	1	3	3	9.8	9.8	8.2	96.864	858	858;839	0	21.855	8.2	3.3	6.2	1.6	5.5	5.5	60191000	17072000	11748000	15394000	4324700	6077300
Q92614	Q92614	8	8	8	Unconventional myosin-XVIIIa	MYO18A		1	8	8	8	3	2	2	1	2	1	3	2	2	1	2	1	3	2	2	1	2	1	6.4	6.4	6.4	233.11	2054	2054	0	10.235	2.4	1.3	1.8	0.8	2.2	0.4	17054000	6668500	2400000	1913700	1017400	5054300
Q92616	Q92616	1	1	1	Translational activator GCN1	GCN1L1		1	1	1	1	1	0	0	0	0	0	1	0	0	0	0	0	1	0	0	0	0	0	0.5	0.5	0.5	292.75	2671	2671	0.0092507	1.5967	0.5	0	0	0	0	0	2145300	2145300	0	0	0	0
Q92692	Q92692	4	4	4	Nectin-2	PVRL2		1	4	4	4	1	2	1	2	2	2	1	2	1	2	2	2	1	2	1	2	2	2	9.9	9.9	9.9	57.741	538	538	0	9.6668	3	6.5	3.5	4.5	3.3	4.5	21086000	3033300	5978300	2329800	4015800	2177800
Q92841	Q92841	6	4	4	Probable ATP-dependent RNA helicase DDX17	DDX17		1	6	4	4	4	3	4	3	2	2	2	2	3	2	1	1	2	2	3	2	1	1	9.7	6.4	6.4	80.272	729	729	0	9.1791	6.6	4.4	6.7	5.2	3.2	3.2	22870000	6458000	3374200	6163300	4236900	1502200
Q92876	Q92876	1	1	1	Kallikrein-6	KLK6		1	1	1	1	1	1	1	1	1	1	1	1	1	1	1	1	1	1	1	1	1	1	4.9	4.9	4.9	26.855	244	244	0	3.7202	4.9	4.9	4.9	4.9	4.9	4.9	9591100	2183600	1639800	1683100	1601600	1270000
Q92896	Q92896	8	8	8	Golgi apparatus protein 1	GLG1		1	8	8	8	5	4	4	4	4	3	5	4	4	4	4	3	5	4	4	4	4	3	9.8	9.8	9.8	134.55	1179	1179	0	29.403	6.3	4.6	4.6	5	4.5	3.1	84406000	16920000	13328000	11402000	15939000	13513000
Q93077	Q93077	7	2	0	Histone H2A type 1-C	HIST1H2AC		1	7	2	0	7	6	6	6	5	6	2	2	1	1	1	1	0	0	0	0	0	0	26.2	13.8	0	14.105	130	130	0	15.284	26.2	26.2	26.2	26.2	26.2	26.2	408830000	96879000	100060000	83375000	51926000	37365000
Q969P0	Q969P0	11	11	11	Immunoglobulin superfamily member 8	IGSF8		1	11	11	11	8	8	7	5	5	4	8	8	7	5	5	4	8	8	7	5	5	4	28.5	28.5	28.5	65.033	613	613	0	51.564	19.9	23.3	16	12.9	12.7	10.6	227510000	55251000	54961000	42516000	21271000	29432000
Q969Q0;P83881	Q969Q0	2;2	2;2	2;2	60S ribosomal protein L36a-like;60S ribosomal protein L36a	RPL36AL;RPL36A	;	2	2	2	2	1	2	1	1	1	1	1	2	1	1	1	1	1	2	1	1	1	1	15.1	15.1	15.1	12.469	106	106;106	0	3.7593	8.5	15.1	8.5	8.5	8.5	8.5	107400000	31872000	22073000	18490000	9361200	12663000
Q969X1	Q969X1	1	1	1	Protein lifeguard 3	TMBIM1		1	1	1	1	1	1	0	1	1	1	1	1	0	1	1	1	1	1	0	1	1	1	4.5	4.5	4.5	34.607	311	311	0	4.8346	4.5	4.5	0	4.5	4.5	4.5	26260000	4454000	4123800	0	5643000	6692300
Q96AG4	Q96AG4	2	2	2	Leucine-rich repeat-containing protein 59	LRRC59		1	2	2	2	2	1	1	2	2	2	2	1	1	2	2	2	2	1	1	2	2	2	7.2	7.2	7.2	34.93	307	307	0	3.6403	7.2	3.9	3.9	7.2	7.2	7.2	16189000	5623400	1808300	1837400	2525500	2479800
Q96B97	Q96B97	1	1	1	SH3 domain-containing kinase-binding protein 1	SH3KBP1		1	1	1	1	1	1	1	1	1	1	1	1	1	1	1	1	1	1	1	1	1	1	2.9	2.9	2.9	73.125	665	665	0	3.7994	2.9	2.9	2.9	2.9	2.9	2.9	6714000	1378100	1257600	1215700	938040	1065300
Q96CS7	Q96CS7	2	2	2	Pleckstrin homology domain-containing family B member 2	PLEKHB2		1	2	2	2	1	0	1	0	0	0	1	0	1	0	0	0	1	0	1	0	0	0	10.4	10.4	10.4	24.736	222	222	0	3.7037	7.2	0	3.2	0	0	0	3693100	3693100	0	0	0	0
Q96DG6	Q96DG6	2	2	2	Carboxymethylenebutenolidase homolog	CMBL		1	2	2	2	2	2	1	1	0	1	2	2	1	1	0	1	2	2	1	1	0	1	9	9	9	28.048	245	245	0	3.2399	9	9	5.7	5.7	0	5.7	8753400	2364500	2647300	1596200	949280	0
Q96DV4	Q96DV4	2	2	2	39S ribosomal protein L38, mitochondrial	MRPL38		1	2	2	2	1	2	1	1	1	1	1	2	1	1	1	1	1	2	1	1	1	1	4.5	4.5	4.5	44.596	380	380	0	2.8562	2.6	4.5	2.6	2.6	2.6	2.6	9860800	1799100	2402000	1740200	1497700	1210600
Q96E39;P38159;O75526;Q8N7X1	Q96E39	2;2;1;1	2;2;1;1	2;2;1;1	RNA binding motif protein, X-linked-like-1;RNA-binding motif protein, X chromosome;RNA-binding motif protein, X chromosome, N-terminally processed;RNA-binding motif protein, X-linked-like-2;RNA-binding motif protein, X-linked-like-3	RBMXL1;RBMX;RBMXL2;RBMXL3	;;;	4	2	2	2	2	1	2	0	0	0	2	1	2	0	0	0	2	1	2	0	0	0	6.9	6.9	6.9	42.141	390	390;391;392;1067	0	4.1152	6.9	3.6	6.9	0	0	0	8525300	3840400	1617400	3067500	0	0
Q96EY5	Q96EY5	3	3	3	Multivesicular body subunit 12A	MVB12A		1	3	3	3	2	2	2	3	3	2	2	2	2	3	3	2	2	2	2	3	3	2	17.6	17.6	17.6	28.783	273	273	0	25.917	12.1	12.1	12.1	17.6	17.6	12.1	104810000	17606000	20182000	17540000	20244000	15825000
Q96FJ2;P63167	Q96FJ2	1;1	1;1	1;1	Dynein light chain 2, cytoplasmic;Dynein light chain 1, cytoplasmic	DYNLL2;DYNLL1	;	2	1	1	1	1	0	0	1	0	1	1	0	0	1	0	1	1	0	0	1	0	1	12.4	12.4	12.4	10.35	89	89;89	0.0010091	2.1303	12.4	0	0	12.4	0	12.4	6356800	4799000	0	0	813800	0
Q96FQ6	Q96FQ6	5	5	5	Protein S100-A16	S100A16		1	5	5	5	3	3	4	4	4	3	3	3	4	4	4	3	3	3	4	4	4	3	45.6	45.6	45.6	11.801	103	103	0	22.372	26.2	26.2	36.9	35	35	26.2	161670000	29435000	25811000	24044000	27694000	28557000
Q96FW1	Q96FW1	1	1	1	Ubiquitin thioesterase OTUB1	OTUB1		1	1	1	1	1	1	0	0	0	0	1	1	0	0	0	0	1	1	0	0	0	0	7	7	7	31.284	271	271	0	10.417	7	7	0	0	0	0	4461500	2382100	2079500	0	0	0
Q96FZ7	Q96FZ7	1	1	1	Charged multivesicular body protein 6	CHMP6		1	1	1	1	1	0	0	1	0	1	1	0	0	1	0	1	1	0	0	1	0	1	6.5	6.5	6.5	23.485	201	201	0	3.1128	6.5	0	0	6.5	0	6.5	3249800	0	0	0	1770300	0
Q96HR9	Q96HR9	1	1	1	Receptor expression-enhancing protein 6	REEP6		1	1	1	1	0	1	0	0	0	0	0	1	0	0	0	0	0	1	0	0	0	0	6.2	6.2	6.2	23.418	211	211	0.0092678	1.6329	0	6.2	0	0	0	0	1166400	0	1166400	0	0	0
Q96J02	Q96J02	1	1	1	E3 ubiquitin-protein ligase Itchy homolog	ITCH		1	1	1	1	0	1	0	0	0	0	0	1	0	0	0	0	0	1	0	0	0	0	1.7	1.7	1.7	102.8	903	903	0.0083643	1.651	0	1.7	0	0	0	0	1297100	0	1297100	0	0	0
Q96JB2	Q96JB2	1	1	1	Conserved oligomeric Golgi complex subunit 3	COG3		1	1	1	1	1	0	1	1	1	0	1	0	1	1	1	0	1	0	1	1	1	0	1.8	1.8	1.8	94.095	828	828	0	7.1979	1.8	0	1.8	1.8	1.8	0	9416800	2890900	0	2517300	2161300	1847400
Q96JB6	Q96JB6	2	2	2	Lysyl oxidase homolog 4	LOXL4		1	2	2	2	1	0	0	2	2	2	1	0	0	2	2	2	1	0	0	2	2	2	4	4	4	84.483	756	756	0	5.369	1.9	0	0	4	4	4	10434000	658220	0	0	3274300	3608000
Q96KN1	Q96KN1	2	2	2	Protein FAM84B	FAM84B		1	2	2	2	2	0	0	0	0	0	2	0	0	0	0	0	2	0	0	0	0	0	12.9	12.9	12.9	34.474	310	310	0	6.2433	12.9	0	0	0	0	0	4775100	4775100	0	0	0	0
Q96KP4	Q96KP4	3	3	3	Cytosolic non-specific dipeptidase	CNDP2		1	3	3	3	2	3	2	2	1	1	2	3	2	2	1	1	2	3	2	2	1	1	8.4	8.4	8.4	52.878	475	475	0	6.2181	6.7	8.4	6.7	6.7	2.3	2.3	20477000	4073900	8650500	3427400	2383600	923960
Q96P70	Q96P70	1	1	1	Importin-9	IPO9		1	1	1	1	1	1	1	1	1	1	1	1	1	1	1	1	1	1	1	1	1	1	2	2	2	115.96	1041	1041	0	10.709	2	2	2	2	2	2	18379000	5206300	5274900	2922500	1457000	2166400
Q96PU5	Q96PU5	1	1	1	E3 ubiquitin-protein ligase NEDD4-like	NEDD4L		1	1	1	1	0	0	0	0	1	0	0	0	0	0	1	0	0	0	0	0	1	0	1.9	1.9	1.9	111.93	975	975	0.0010384	2.4631	0	0	0	0	1.9	0	1527700	0	0	0	0	1527700
Q96Q15	Q96Q15	2	2	2	Serine/threonine-protein kinase SMG1	SMG1		1	2	2	2	1	2	2	1	1	2	1	2	2	1	1	2	1	2	2	1	1	2	0.2	0.2	0.2	410.5	3661	3661	0.001056	2.5708	0.2	0.2	0.2	0.2	0.2	0.2	57986000	15083000	13174000	12743000	0	7136600
Q96QK1	Q96QK1	3	3	3	Vacuolar protein sorting-associated protein 35	VPS35		1	3	3	3	2	2	2	0	0	0	2	2	2	0	0	0	2	2	2	0	0	0	5.5	5.5	5.5	91.706	796	796	0	4.6796	3.1	4.3	4.3	0	0	0	11811000	4640600	3793600	3376400	0	0
Q96S97	Q96S97	2	2	2	Myeloid-associated differentiation marker	MYADM		1	2	2	2	1	2	1	1	1	0	1	2	1	1	1	0	1	2	1	1	1	0	10.2	10.2	10.2	35.273	322	322	0	19.917	7.1	10.2	7.1	7.1	7.1	0	17494000	3853000	5360900	3285100	2600700	2394200
Q96TA1	Q96TA1	8	8	8	Niban-like protein 1	FAM129B		1	8	8	8	6	4	5	4	4	3	6	4	5	4	4	3	6	4	5	4	4	3	12.5	12.5	12.5	84.137	746	746	0	27.417	11.3	6.6	8.8	7.1	6.2	5.8	130880000	52946000	16887000	19341000	14840000	16795000
Q99436	Q99436	5	5	5	Proteasome subunit beta type-7	PSMB7		1	5	5	5	4	3	1	2	3	2	4	3	1	2	3	2	4	3	1	2	3	2	17.7	17.7	17.7	29.965	277	277	0	16.374	13.7	12.6	5.1	7.6	12.6	8.7	53295000	20117000	10181000	4651400	4414600	7139500
Q99460	Q99460	4	4	4	26S proteasome non-ATPase regulatory subunit 1	PSMD1		1	4	4	4	1	3	3	3	3	2	1	3	3	3	3	2	1	3	3	3	3	2	7.1	7.1	7.1	105.84	953	953	0	12.271	1.4	5.6	5.8	5.6	5.6	3.6	27223000	1460300	6426300	7334900	4215200	4016200
Q99497	Q99497	7	7	7	Protein deglycase DJ-1	PARK7		1	7	7	7	5	3	2	3	5	4	5	3	2	3	5	4	5	3	2	3	5	4	50.8	50.8	50.8	19.891	189	189	0	24.085	38.6	26.5	13.2	21.7	38.6	25.4	84312000	23343000	21674000	9432600	8808800	10651000
Q99613;B5ME19	Q99613	4;4	4;4	4;4	Eukaryotic translation initiation factor 3 subunit C;Eukaryotic translation initiation factor 3 subunit C-like protein	EIF3C;EIF3CL	;	2	4	4	4	2	1	2	0	1	0	2	1	2	0	1	0	2	1	2	0	1	0	6.1	6.1	6.1	105.34	913	913;914	0	7.0514	3.1	1	2.7	0	2.1	0	8790200	4935700	1687400	1022300	0	1144800
Q99623	Q99623	4	4	4	Prohibitin-2	PHB2		1	4	4	4	1	0	1	1	2	2	1	0	1	1	2	2	1	0	1	1	2	2	17.1	17.1	17.1	33.296	299	299	0	5.968	4.3	0	4.3	4	9.7	7	10462000	1148000	0	726110	1403000	4076300
Q99714	Q99714	1	1	1	3-hydroxyacyl-CoA dehydrogenase type-2	HSD17B10		1	1	1	1	1	1	0	0	0	0	1	1	0	0	0	0	1	1	0	0	0	0	8.8	8.8	8.8	26.923	261	261	0	2.9235	8.8	8.8	0	0	0	0	4353300	2196400	2156900	0	0	0
Q99747	Q99747	1	1	1	Gamma-soluble NSF attachment protein	NAPG		1	1	1	1	0	0	0	0	0	1	0	0	0	0	0	1	0	0	0	0	0	1	5.4	5.4	5.4	34.746	312	312	0.00098425	1.9788	0	0	0	0	0	5.4	1469700	0	0	0	0	0
Q99805	Q99805	3	3	3	Transmembrane 9 superfamily member 2	TM9SF2		1	3	3	3	3	3	3	0	2	1	3	3	3	0	2	1	3	3	3	0	2	1	4.7	4.7	4.7	75.775	663	663	0	8.7978	4.7	4.7	4.7	0	2.9	2.3	47410000	17020000	12771000	10069000	0	3932500
Q99816	Q99816	13	13	13	Tumor susceptibility gene 101 protein	TSG101		1	13	13	13	10	9	9	7	8	7	10	9	9	7	8	7	10	9	9	7	8	7	37.7	37.7	37.7	43.944	390	390	0	35.183	29.2	30.3	30.3	21.8	26.4	24.9	329880000	70545000	64752000	59114000	48734000	40429000
Q99828	Q99828	6	6	6	Calcium and integrin-binding protein 1	CIB1		1	6	6	6	5	5	3	5	5	5	5	5	3	5	5	5	5	5	3	5	5	5	40.8	40.8	40.8	21.703	191	191	0	22.272	36.1	36.1	22	36.1	33.5	31.9	90846000	26895000	16858000	9381000	13378000	12752000
Q99832	Q99832	13	13	13	T-complex protein 1 subunit eta	CCT7		1	13	13	13	6	11	9	7	8	9	6	11	9	7	8	9	6	11	9	7	8	9	30	30	30	59.366	543	543	0	67.708	13.1	26.9	21.9	20.8	23	24.9	234410000	40294000	53770000	42157000	28804000	33271000
Q99848	Q99848	8	8	8	Probable rRNA-processing protein EBP2	EBNA1BP2		1	8	8	8	4	7	4	2	3	2	4	7	4	2	3	2	4	7	4	2	3	2	32.4	32.4	32.4	34.852	306	306	0	13.193	19.6	29.4	20.9	10.5	13.7	10.5	57960000	10789000	19447000	10029000	5423500	7179200
Q99873;Q9NR22	Q99873	8;1	8;1	8;1	Protein arginine N-methyltransferase 1	PRMT1		2	8	8	8	7	3	6	4	3	4	7	3	6	4	3	4	7	3	6	4	3	4	29.6	29.6	29.6	41.515	361	361;394	0	17.187	27.4	10.5	21.3	15.8	10.2	13.9	56327000	17152000	10577000	12872000	6300000	3679700
Q99878;Q96KK5;Q9BTM1;Q16777;Q6FI13;P0C0S8;Q96QV6	Q99878	7;7;7;7;7;7;5	7;7;7;7;7;7;5	0;0;0;0;0;0;0	Histone H2A type 1-J;Histone H2A type 1-H;Histone H2A.J;Histone H2A type 2-C;Histone H2A type 2-A;Histone H2A type 1;Histone H2A type 1-A	HIST1H2AJ;HIST1H2AH;H2AFJ;HIST2H2AC;HIST2H2AA3;HIST1H2AG;HIST1H2AA	;;;;;;	7	7	7	0	7	6	7	7	6	7	7	6	7	7	6	7	0	0	0	0	0	0	26.6	26.6	0	13.936	128	128;128;129;129;130;130;131	0	135.22	26.6	26.6	26.6	26.6	26.6	26.6	8330400000	2357400000	1536200000	1389600000	999460000	937590000
Q99879;Q99877;Q93079;Q5QNW6;P62807;P58876;O60814;P57053	Q99879	12;12;12;12;12;12;12;11	12;12;12;12;12;12;12;11	0;0;0;0;0;0;0;0	Histone H2B type 1-M;Histone H2B type 1-N;Histone H2B type 1-H;Histone H2B type 2-F;Histone H2B type 1-C/E/F/G/I;Histone H2B type 1-D;Histone H2B type 1-K;Histone H2B type F-S	HIST1H2BM;HIST1H2BN;HIST1H2BH;HIST2H2BF;HIST1H2BC;HIST1H2BD;HIST1H2BK;H2BFS	;;;;;;;	8	12	12	0	12	10	10	9	9	8	12	10	10	9	9	8	0	0	0	0	0	0	67.5	67.5	0	13.989	126	126;126;126;126;126;126;126;126	0	68.752	67.5	56.3	56.3	58.7	54.8	52.4	14454000000	3245300000	2676600000	2687200000	1998500000	1936700000
Q99880;Q96A08	Q99880	12;6	1;1	0;0	Histone H2B type 1-L;Histone H2B type 1-A	HIST1H2BL;HIST1H2BA	;	2	12	1	0	12	10	10	9	9	8	1	1	1	1	1	1	0	0	0	0	0	0	67.5	5.6	0	13.952	126	126;127	0	3.4938	67.5	56.3	56.3	58.7	54.8	52.4	57328000	13306000	10136000	11926000	5420300	8196100
Q99988	Q99988	2	2	2	Growth/differentiation factor 15	GDF15		1	2	2	2	1	0	0	1	2	1	1	0	0	1	2	1	1	0	0	1	2	1	6.2	6.2	6.2	34.14	308	308	0.001001	2.0772	3.9	0	0	3.9	6.2	3.9	23290000	4703800	0	0	4984000	8354600
Q9BR76	Q9BR76	5	5	5	Coronin-1B	CORO1B		1	5	5	5	5	4	2	1	3	3	5	4	2	1	3	3	5	4	2	1	3	3	15.3	15.3	15.3	54.234	489	489	0	8.6849	15.3	9.4	3.7	2.7	6.3	7.4	39040000	11930000	8757900	1990400	4540900	4480600
Q9BRG1	Q9BRG1	2	2	2	Vacuolar protein-sorting-associated protein 25	VPS25		1	2	2	2	0	1	1	2	0	1	0	1	1	2	0	1	0	1	1	2	0	1	11.4	11.4	11.4	20.747	176	176	0.0010204	2.2071	0	5.7	5.7	11.4	0	5.7	6635800	0	1115900	1433000	2509900	0
Q9BRJ6	Q9BRJ6	3	3	3	Uncharacterized protein C7orf50	C7orf50		1	3	3	3	3	1	2	1	1	0	3	1	2	1	1	0	3	1	2	1	1	0	24.7	24.7	24.7	22.083	194	194	0	5.3951	24.7	7.2	13.4	7.2	7.2	0	16063000	7449400	2043400	3838500	1524700	1206500
Q9BRK5	Q9BRK5	4	4	4	45 kDa calcium-binding protein	SDF4		1	4	4	4	1	2	1	1	1	1	1	2	1	1	1	1	1	2	1	1	1	1	16.3	16.3	16.3	41.806	362	362	0	5.595	5.8	8.3	4.4	4.4	2.5	3.6	11026000	1675500	3049200	1316000	1752600	1438500
Q9BS26	Q9BS26	2	2	2	Endoplasmic reticulum resident protein 44	ERP44		1	2	2	2	1	2	0	0	1	0	1	2	0	0	1	0	1	2	0	0	1	0	9.4	9.4	9.4	46.971	406	406	0	4.0931	3.7	9.4	0	0	5.7	0	5151300	1030000	2792700	0	0	1328600
Q9BT67	Q9BT67	1	1	1	NEDD4 family-interacting protein 1	NDFIP1		1	1	1	1	1	0	0	1	0	1	1	0	0	1	0	1	1	0	0	1	0	1	7.7	7.7	7.7	24.899	221	221	0	51.073	7.7	0	0	7.7	0	7.7	6326300	0	0	0	3515200	0
Q9BTT6	Q9BTT6	3	1	1	Leucine-rich repeat-containing protein 1	LRRC1		1	3	1	1	1	1	2	1	2	2	0	0	1	0	0	1	0	0	1	0	0	1	8.2	3.8	3.8	59.241	524	524	0.00099502	2.03	2.5	2.5	6.3	2.5	4.4	5.7	2753700	0	0	1637500	0	0
Q9BUP3	Q9BUP3	2	2	2	Oxidoreductase HTATIP2	HTATIP2		1	2	2	2	1	0	0	1	0	0	1	0	0	1	0	0	1	0	0	1	0	0	9.5	9.5	9.5	27.049	242	242	0.0010471	2.4922	5.4	0	0	4.1	0	0	1943300	1002300	0	0	940990	0
Q9BV40	Q9BV40	2	2	2	Vesicle-associated membrane protein 8	VAMP8		1	2	2	2	0	0	1	0	1	0	0	0	1	0	1	0	0	0	1	0	1	0	24	24	24	11.438	100	100	0	2.7826	0	0	14	0	10	0	5730900	0	0	4703800	0	1027100
Q9BVA1;Q13885	Q9BVA1	17;17	1;1	1;1	Tubulin beta-2B chain;Tubulin beta-2A chain	TUBB2B;TUBB2A	;	2	17	1	1	12	14	14	13	13	14	0	0	0	0	0	1	0	0	0	0	0	1	48.1	3.4	3.4	49.953	445	445;445	1	-2	31	38.7	35.3	35.1	36.9	39.3	2742300	0	0	0	0	0
Q9BW30	Q9BW30	1	1	1	Tubulin polymerization-promoting protein family member 3	TPPP3		1	1	1	1	1	0	0	0	0	0	1	0	0	0	0	0	1	0	0	0	0	0	14.2	14.2	14.2	18.985	176	176	0.0084034	1.6611	14.2	0	0	0	0	0	2860900	2860900	0	0	0	0
Q9BWD1	Q9BWD1	2	2	2	Acetyl-CoA acetyltransferase, cytosolic	ACAT2		1	2	2	2	0	2	0	1	0	0	0	2	0	1	0	0	0	2	0	1	0	0	9.6	9.6	9.6	41.35	397	397	0	5.3598	0	9.6	0	6.8	0	0	5852600	0	4163700	0	1688900	0
Q9BWJ5	Q9BWJ5	1	1	1	Splicing factor 3B subunit 5	SF3B5		1	1	1	1	1	0	0	0	0	0	1	0	0	0	0	0	1	0	0	0	0	0	18.6	18.6	18.6	10.135	86	86	0	5.0215	18.6	0	0	0	0	0	2580900	2580900	0	0	0	0
Q9BY43	Q9BY43	1	1	1	Charged multivesicular body protein 4a	CHMP4A		1	1	1	1	1	1	1	1	1	1	1	1	1	1	1	1	1	1	1	1	1	1	6.3	6.3	6.3	25.098	222	222	0	5.623	6.3	6.3	6.3	6.3	6.3	6.3	11864000	2582200	1747800	2289600	1443600	2019800
Q9BYD3	Q9BYD3	2	2	2	39S ribosomal protein L4, mitochondrial	MRPL4		1	2	2	2	2	2	2	1	1	1	2	2	2	1	1	1	2	2	2	1	1	1	11.3	11.3	11.3	34.919	311	311	0	5.2313	11.3	11.3	11.3	5.1	5.1	5.1	15637000	4200800	4040900	3642800	1407300	1092100
Q9C037	Q9C037	1	1	1	E3 ubiquitin-protein ligase TRIM4	TRIM4		1	1	1	1	1	0	0	1	0	0	1	0	0	1	0	0	1	0	0	1	0	0	2.2	2.2	2.2	57.46	500	500	1	-2	2.2	0	0	2.2	0	0	57304000	39495000	0	0	17810000	0
Q9C0H2	Q9C0H2	3	3	3	Protein tweety homolog 3	TTYH3		1	3	3	3	2	3	2	1	1	1	2	3	2	1	1	1	2	3	2	1	1	1	8.4	8.4	8.4	57.544	523	523	0	20.809	5.5	8.4	5.7	2.9	2.7	2.9	90271000	19606000	21315000	21531000	14579000	1965700
Q9GZM7	Q9GZM7	13	13	13	Tubulointerstitial nephritis antigen-like	TINAGL1		1	13	13	13	6	6	7	9	11	10	6	6	7	9	11	10	6	6	7	9	11	10	40.5	40.5	40.5	52.387	467	467	0	88.631	20.6	20.6	26.1	27	36.8	29.8	552280000	71732000	51979000	44308000	103790000	130790000
Q9H0E2	Q9H0E2	5	5	5	Toll-interacting protein	TOLLIP		1	5	5	5	4	3	3	5	5	3	4	3	3	5	5	3	4	3	3	5	5	3	21.5	21.5	21.5	30.281	274	274	0	18.6	16.1	13.1	13.1	21.5	21.5	13.1	96953000	24134000	11315000	10925000	18342000	20051000
Q9H0H5	Q9H0H5	2	2	2	Rac GTPase-activating protein 1	RACGAP1		1	2	2	2	0	0	0	2	1	0	0	0	0	2	1	0	0	0	0	2	1	0	5.2	5.2	5.2	71.026	632	632	0	2.8554	0	0	0	5.2	2.5	0	4411400	0	0	0	2793000	1618300
Q9H0W9	Q9H0W9	1	1	1	Ester hydrolase C11orf54	C11orf54		1	1	1	1	1	0	1	1	1	0	1	0	1	1	1	0	1	0	1	1	1	0	5.4	5.4	5.4	35.117	315	315	0	2.6724	5.4	0	5.4	5.4	5.4	0	10200000	3154900	0	3287100	1896700	1861800
Q9H190	Q9H190	8	8	8	Syntenin-2	SDCBP2		1	8	8	8	3	3	5	7	6	7	3	3	5	7	6	7	3	3	5	7	6	7	24.3	24.3	24.3	31.593	292	292	0	16.377	10.3	9.6	17.1	20.5	17.5	20.5	457370000	55003000	26661000	59842000	113940000	107730000
Q9H1C7	Q9H1C7	1	1	1	Cysteine-rich and transmembrane domain-containing protein 1	CYSTM1		1	1	1	1	1	1	1	1	1	1	1	1	1	1	1	1	1	1	1	1	1	1	11.3	11.3	11.3	10.631	97	97	0	4.5096	11.3	11.3	11.3	11.3	11.3	11.3	37568000	8594600	5938900	5301200	4850500	5225000
Q9H1R2	Q9H1R2	1	1	1	Dual specificity protein phosphatase 15	DUSP15		1	1	1	1	0	1	0	1	1	1	0	1	0	1	1	1	0	1	0	1	1	1	4.4	4.4	4.4	31.881	295	295	0.008427	1.6823	0	4.4	0	4.4	4.4	4.4	33087000	0	9463100	0	9158700	6353500
Q9H223	Q9H223	14	14	11	EH domain-containing protein 4	EHD4		1	14	14	11	10	7	8	6	8	6	10	7	8	6	8	6	7	6	7	5	7	5	28.7	28.7	22.9	61.174	541	541	0	43.712	22.4	16.1	19.2	14.2	18.3	14.4	208800000	42893000	28441000	38764000	34985000	33769000
Q9H299	Q9H299	3	3	3	SH3 domain-binding glutamic acid-rich-like protein 3	SH3BGRL3		1	3	3	3	1	1	2	3	2	3	1	1	2	3	2	3	1	1	2	3	2	3	39.8	39.8	39.8	10.438	93	93	0	13.335	20.4	20.4	29	39.8	19.4	39.8	51673000	4976800	4571100	10022000	12815000	6874300
Q9H307	Q9H307	3	3	3	Pinin	PNN		1	3	3	3	3	3	2	2	1	1	3	3	2	2	1	1	3	3	2	2	1	1	5.7	5.7	5.7	81.613	717	717	0	6.6685	5.7	5.7	4.6	3.5	1.1	2.4	558180000	195210000	204420000	4397600	86314000	66420000
Q9H3K6	Q9H3K6	2	2	2	BolA-like protein 2	BOLA2		1	2	2	2	2	2	1	1	1	1	2	2	1	1	1	1	2	2	1	1	1	1	40.7	40.7	40.7	10.116	86	86	0	15.223	40.7	40.7	18.6	18.6	18.6	18.6	19422000	1392600	4832700	5302400	2119100	3600100
Q9H3R2	Q9H3R2	6	6	6	Mucin-13	MUC13		1	6	6	6	3	4	5	5	5	4	3	4	5	5	5	4	3	4	5	5	5	4	20.5	20.5	20.5	54.603	512	512	0	50.497	9.6	12.7	17.2	16	16	12.7	330390000	96367000	63228000	55705000	40652000	35086000
Q9H444;P59074	Q9H444	8;1	8;1	7;1	Charged multivesicular body protein 4b	CHMP4B		2	8	8	7	6	6	6	3	7	5	6	6	6	3	7	5	5	5	5	3	6	4	37.1	37.1	33.9	24.95	224	224;171	0	35.174	30.4	30.4	28.6	15.2	33.5	18.8	287570000	65004000	50579000	51722000	36834000	51046000
Q9H4A4	Q9H4A4	2	2	2	Aminopeptidase B	RNPEP		1	2	2	2	2	2	1	1	0	1	2	2	1	1	0	1	2	2	1	1	0	1	4.6	4.6	4.6	72.595	650	650	0	4.6273	4.6	4.6	2.8	1.8	0	1.8	17952000	5209200	6394200	2786400	1988000	0
Q9H4G0	Q9H4G0	4	4	4	Band 4.1-like protein 1	EPB41L1		1	4	4	4	1	1	0	1	2	2	1	1	0	1	2	2	1	1	0	1	2	2	7.9	7.9	7.9	98.502	881	881	0	8.648	1.8	1.7	0	2.7	4.4	4.4	9593300	1126100	605790	0	2529600	2523200
Q9H4M9	Q9H4M9	9	7	5	EH domain-containing protein 1	EHD1		1	9	7	5	4	3	1	2	4	4	2	3	1	2	4	4	1	2	1	2	2	4	22.1	18.4	14.6	60.626	534	534	0	21.109	10.1	9.7	4.3	7.1	10.9	11.2	64097000	6919600	10534000	9899300	14783000	9979600
Q9H5V8	Q9H5V8	4	4	4	CUB domain-containing protein 1	CDCP1		1	4	4	4	1	0	1	1	1	2	1	0	1	1	1	2	1	0	1	1	1	2	5.4	5.4	5.4	92.931	836	836	0	4.6106	1.2	0	1.2	1.9	1.2	3	10043000	1648500	0	1505600	2306400	1365000
Q9H6S3	Q9H6S3	2	2	2	Epidermal growth factor receptor kinase substrate 8-like protein 2	EPS8L2		1	2	2	2	2	2	1	1	2	1	2	2	1	1	2	1	2	2	1	1	2	1	4.3	4.3	4.3	80.62	715	715	0	5.5599	4.3	4.3	2.5	2.5	4.3	2.5	16933000	4474800	4090000	1645900	1992400	2879800
Q9H7B2	Q9H7B2	1	1	1	Ribosome production factor 2 homolog	RPF2		1	1	1	1	1	1	1	0	0	0	1	1	1	0	0	0	1	1	1	0	0	0	5.6	5.6	5.6	35.582	306	306	0	3.583	5.6	5.6	5.6	0	0	0	8705600	3238700	2983200	2483600	0	0
Q9H8S9;Q7L9L4	Q9H8S9	1;1	1;1	1;1	MOB kinase activator 1A;MOB kinase activator 1B	MOB1A;MOB1B	;	2	1	1	1	0	1	0	1	0	0	0	1	0	1	0	0	0	1	0	1	0	0	5.1	5.1	5.1	25.079	216	216;216	0.00098135	1.9622	0	5.1	0	5.1	0	0	8183400	0	4328700	0	3854700	0
Q9H9H4	Q9H9H4	4	4	4	Vacuolar protein sorting-associated protein 37B	VPS37B		1	4	4	4	3	3	2	4	4	2	3	3	2	4	4	2	3	3	2	4	4	2	22.8	22.8	22.8	31.307	285	285	0	24.049	18.9	13.7	9.8	22.8	22.8	15.1	127750000	19502000	19191000	18926000	26448000	26682000
Q9H9J2	Q9H9J2	3	3	3	39S ribosomal protein L44, mitochondrial	MRPL44		1	3	3	3	1	0	1	1	2	1	1	0	1	1	2	1	1	0	1	1	2	1	14.8	14.8	14.8	37.535	332	332	0	6.5796	5.1	0	5.7	5.7	9.6	5.1	6178300	882810	0	1472100	942310	2158600
Q9HAK2	Q9HAK2	1	1	1	Transcription factor COE2	EBF2		1	1	1	1	1	1	1	1	1	1	1	1	1	1	1	1	1	1	1	1	1	1	1.9	1.9	1.9	62.649	575	575	0.00099305	2.018	1.9	1.9	1.9	1.9	1.9	1.9	162670000	26189000	21579000	25234000	28599000	35590000
Q9HC07	Q9HC07	1	1	1	Transmembrane protein 165	TMEM165		1	1	1	1	0	0	1	0	0	0	0	0	1	0	0	0	0	0	1	0	0	0	7.7	7.7	7.7	34.905	324	324	0.0010341	2.4003	0	0	7.7	0	0	0	2663100	0	0	2663100	0	0
Q9HC35	Q9HC35	2	2	2	Echinoderm microtubule-associated protein-like 4	EML4		1	2	2	2	2	0	2	0	0	0	2	0	2	0	0	0	2	0	2	0	0	0	2.2	2.2	2.2	108.91	981	981	0.0010417	2.473	2.2	0	2.2	0	0	0	8196100	5372100	0	2824000	0	0
Q9HCE0	Q9HCE0	1	1	1	Ectopic P granules protein 5 homolog	EPG5		1	1	1	1	1	0	0	0	0	0	1	0	0	0	0	0	1	0	0	0	0	0	0.6	0.6	0.6	292.48	2579	2579	0.001005	2.1278	0.6	0	0	0	0	0	6860000	6860000	0	0	0	0
Q9HCE1	Q9HCE1	9	9	9	Putative helicase MOV-10	MOV10		1	9	9	9	4	4	5	3	3	3	4	4	5	3	3	3	4	4	5	3	3	3	11.6	11.6	11.6	113.67	1003	1003	0	20.319	5.5	5	7.3	4.3	5	4.3	58325000	11727000	11036000	15479000	5747900	7523800
Q9HCM7	Q9HCM7	1	1	1	Fibrosin-1-like protein	FBRSL1		1	1	1	1	0	0	1	0	0	0	0	0	1	0	0	0	0	0	1	0	0	0	1.3	1.3	1.3	110.91	1045	1045	0	3.3422	0	0	1.3	0	0	0	9803200	0	0	9803200	0	0
Q9HCY8	Q9HCY8	6	6	6	Protein S100-A14	S100A14		1	6	6	6	3	3	3	4	3	4	3	3	3	4	3	4	3	3	3	4	3	4	80.8	80.8	80.8	11.662	104	104	0	16.942	40.4	52.9	44.2	54.8	44.2	54.8	83291000	18471000	11317000	13748000	14776000	11556000
Q9HD42	Q9HD42	3	3	3	Charged multivesicular body protein 1a	CHMP1A		1	3	3	3	2	0	1	0	1	2	2	0	1	0	1	2	2	0	1	0	1	2	12.8	12.8	12.8	21.703	196	196	0	3.8486	8.7	0	4.1	0	4.1	8.7	18201000	5807000	0	3899700	0	3277900
Q9HD45	Q9HD45	3	3	3	Transmembrane 9 superfamily member 3	TM9SF3		1	3	3	3	2	1	1	0	0	0	2	1	1	0	0	0	2	1	1	0	0	0	4.1	4.1	4.1	67.887	589	589	0	4.6033	4.1	1.9	1.9	0	0	0	18088000	5811500	6596400	5679900	0	0
Q9HDC9	Q9HDC9	1	1	1	Adipocyte plasma membrane-associated protein	APMAP		1	1	1	1	1	0	1	0	0	1	1	0	1	0	0	1	1	0	1	0	0	1	2.9	2.9	2.9	46.48	416	416	0.00096993	1.9153	2.9	0	2.9	0	0	2.9	4746900	2058400	0	1709000	0	0
Q9NP79	Q9NP79	5	5	5	Vacuolar protein sorting-associated protein VTA1 homolog	VTA1		1	5	5	5	2	2	1	3	3	3	2	2	1	3	3	3	2	2	1	3	3	3	20.2	20.2	20.2	33.879	307	307	0	13.144	9.1	9.1	6.5	14.3	11.1	10.4	59387000	8970500	5231500	4799600	17295000	13507000
Q9NQC3	Q9NQC3	4	4	4	Reticulon-4	RTN4		1	4	4	4	3	4	4	2	4	3	3	4	4	2	4	3	3	4	4	2	4	3	7.2	7.2	7.2	129.93	1192	1192	0	15.961	3.4	7.2	7.2	2.3	7.2	3.4	123550000	27516000	31213000	21622000	8905100	17017000
Q9NQP4	Q9NQP4	1	1	1	Prefoldin subunit 4	PFDN4		1	1	1	1	0	1	1	1	1	1	0	1	1	1	1	1	0	1	1	1	1	1	9	9	9	15.314	134	134	0	4.9278	0	9	9	9	9	9	8930500	0	2568700	2202500	1557800	1262500
Q9NQR4	Q9NQR4	1	1	1	Omega-amidase NIT2	NIT2		1	1	1	1	1	0	0	0	0	0	1	0	0	0	0	0	1	0	0	0	0	0	5.4	5.4	5.4	30.608	276	276	0	2.9425	5.4	0	0	0	0	0	2361400	2361400	0	0	0	0
Q9NR30;Q9BQ39	Q9NR30	26;1	26;1	26;1	Nucleolar RNA helicase 2	DDX21		2	26	26	26	19	16	13	10	11	15	19	16	13	10	11	15	19	16	13	10	11	15	31	31	31	87.343	783	783;737	0	51.076	23.2	23	19.8	17.4	18.3	23.5	415740000	109630000	100360000	64658000	39320000	42536000
Q9NR45	Q9NR45	1	1	1	Sialic acid synthase	NANS		1	1	1	1	0	1	1	0	1	0	0	1	1	0	1	0	0	1	1	0	1	0	5	5	5	40.307	359	359	0.0010515	2.5504	0	5	5	0	5	0	2729900	0	0	1310700	0	1419200
Q9NRW1;P20340;Q14964	Q9NRW1	2;2;1	2;2;1	2;2;1	Ras-related protein Rab-6B;Ras-related protein Rab-6A;Ras-related protein Rab-39A	RAB6B;RAB6A;RAB39A	;;	3	2	2	2	2	1	2	1	2	1	2	1	2	1	2	1	2	1	2	1	2	1	10.6	10.6	10.6	23.461	208	208;208;217	0	3.8094	10.6	5.3	10.6	5.3	10.6	5.3	133390000	36842000	27593000	21157000	14779000	19106000
Q9NRX5	Q9NRX5	1	1	1	Serine incorporator 1	SERINC1		1	1	1	1	0	1	1	0	0	1	0	1	1	0	0	1	0	1	1	0	0	1	3.8	3.8	3.8	50.494	453	453	0.0010604	2.61	0	3.8	3.8	0	0	3.8	6036000	0	1726600	2733700	0	0
Q9NRY6	Q9NRY6	2	2	2	Phospholipid scramblase 3	PLSCR3		1	2	2	2	0	1	1	0	0	0	0	1	1	0	0	0	0	1	1	0	0	0	10.5	10.5	10.5	31.648	295	295	0.0010277	2.3268	0	6.4	4.1	0	0	0	3066400	0	1862100	1204300	0	0
Q9NS37	Q9NS37	1	1	1	CREB/ATF bZIP transcription factor	CREBZF		1	1	1	1	1	0	0	0	0	1	1	0	0	0	0	1	1	0	0	0	0	1	2.5	2.5	2.5	37.134	354	354	0.0083877	1.6581	2.5	0	0	0	0	2.5	1934900	1217000	0	0	0	0
Q9NSD9	Q9NSD9	3	3	3	Phenylalanine--tRNA ligase beta subunit	FARSB		1	3	3	3	2	2	1	0	0	0	2	2	1	0	0	0	2	2	1	0	0	0	4.6	4.6	4.6	66.115	589	589	0	3.9127	3.1	3.1	1.5	0	0	0	4390100	2402700	1195500	791810	0	0
Q9NSK0;Q07866;Q9H0B6	Q9NSK0	2;1;1	2;1;1	2;1;1	Kinesin light chain 4;Kinesin light chain 1;Kinesin light chain 2	KLC4;KLC1;KLC2	;;	3	2	2	2	1	1	0	0	0	0	1	1	0	0	0	0	1	1	0	0	0	0	3.1	3.1	3.1	68.639	619	619;573;622	0.00099206	2.0159	1.5	1.6	0	0	0	0	4380900	2964100	1416800	0	0	0
Q9NTK5	Q9NTK5	2	2	2	Obg-like ATPase 1	OLA1		1	2	2	2	1	1	2	1	1	1	1	1	2	1	1	1	1	1	2	1	1	1	6.1	6.1	6.1	44.743	396	396	0	12.297	3.8	3.8	6.1	3.8	3.8	3.8	13033000	3029800	3471300	4967200	0	0
Q9NUP9;O14910	Q9NUP9	3;1	3;1	3;1	Protein lin-7 homolog C	LIN7C		2	3	3	3	2	1	1	2	1	1	2	1	1	2	1	1	2	1	1	2	1	1	14.7	14.7	14.7	21.834	197	197;233	0	5.2112	9.1	5.6	5.6	9.1	5.6	5.6	9832500	0	1229100	1847900	2962600	1850700
Q9NUQ9	Q9NUQ9	2	2	2	Protein FAM49B	FAM49B		1	2	2	2	2	2	2	0	1	0	2	2	2	0	1	0	2	2	2	0	1	0	9.9	9.9	9.9	36.748	324	324	0	7.3245	9.9	9.9	9.9	0	4	0	14806000	4396800	4312900	5030400	0	1065500
Q9NV96	Q9NV96	1	1	1	Cell cycle control protein 50A	TMEM30A		1	1	1	1	1	1	1	1	1	1	1	1	1	1	1	1	1	1	1	1	1	1	2.2	2.2	2.2	40.683	361	361	0.0028874	1.8594	2.2	2.2	2.2	2.2	2.2	2.2	452480000	195570000	82255000	6987100	63357000	44686000
Q9NVP1	Q9NVP1	1	1	1	ATP-dependent RNA helicase DDX18	DDX18		1	1	1	1	1	1	1	0	1	1	1	1	1	0	1	1	1	1	1	0	1	1	1.8	1.8	1.8	75.406	670	670	0	3.6653	1.8	1.8	1.8	0	1.8	1.8	9020500	2105000	2126300	1655600	0	1640100
Q9NWB6	Q9NWB6	3	3	3	Arginine and glutamate-rich protein 1	ARGLU1		1	3	3	3	2	3	1	0	0	0	2	3	1	0	0	0	2	3	1	0	0	0	8.8	8.8	8.8	33.216	273	273	0	3.092	5.9	8.8	2.9	0	0	0	30753000	12932000	10934000	6886200	0	0
Q9NX58	Q9NX58	1	1	1	Cell growth-regulating nucleolar protein	LYAR		1	1	1	1	1	1	1	0	0	0	1	1	1	0	0	0	1	1	1	0	0	0	4.2	4.2	4.2	43.614	379	379	0	7.7316	4.2	4.2	4.2	0	0	0	6054200	2335400	2115700	1603100	0	0
Q9NY12	Q9NY12	3	3	3	H/ACA ribonucleoprotein complex subunit 1	GAR1		1	3	3	3	3	3	2	2	2	2	3	3	2	2	2	2	3	3	2	2	2	2	16.6	16.6	16.6	22.348	217	217	0	7.0354	16.6	16.6	12.4	12.4	12.4	12.4	73873000	18077000	13597000	16881000	7123300	8325800
Q9NY33	Q9NY33	3	3	3	Dipeptidyl peptidase 3	DPP3		1	3	3	3	1	2	0	0	0	0	1	2	0	0	0	0	1	2	0	0	0	0	7.2	7.2	7.2	82.588	737	737	0	6.7279	2.2	5	0	0	0	0	9652200	5157700	4494500	0	0	0
Q9NYF8	Q9NYF8	2	2	2	Bcl-2-associated transcription factor 1	BCLAF1		1	2	2	2	2	0	1	0	0	0	2	0	1	0	0	0	2	0	1	0	0	0	3.8	3.8	3.8	106.12	920	920	0.00098039	1.9485	3.8	0	2.4	0	0	0	6817800	4302500	0	2515200	0	0
Q9NZZ3	Q9NZZ3	5	5	5	Charged multivesicular body protein 5	CHMP5		1	5	5	5	3	2	2	4	3	3	3	2	2	4	3	3	3	2	2	4	3	3	29.7	29.7	29.7	24.57	219	219	0	22.142	21.5	18.3	18.3	26.5	18.3	26.5	164080000	28073000	19365000	23537000	34097000	26032000
Q9P219	Q9P219	1	1	1	Protein Daple	CCDC88C		1	1	1	1	0	0	0	1	0	0	0	0	0	1	0	0	0	0	0	1	0	0	0.4	0.4	0.4	228.23	2028	2028	0.00097752	1.9454	0	0	0	0.4	0	0	0	0	0	0	0	0
Q9P258	Q9P258	1	1	1	Protein RCC2	RCC2		1	1	1	1	1	1	1	0	0	0	1	1	1	0	0	0	1	1	1	0	0	0	3.3	3.3	3.3	56.084	522	522	0	3.4833	3.3	3.3	3.3	0	0	0	5531600	1818900	1975000	1737700	0	0
Q9P265;Q14689	Q9P265	16;1	16;1	16;1	Disco-interacting protein 2 homolog B	DIP2B		2	16	16	16	9	12	8	7	7	6	9	12	8	7	7	6	9	12	8	7	7	6	15	15	15	171.49	1576	1576;1571	0	42.08	8.1	11.4	8.7	6.9	8	5.9	158440000	35241000	39257000	28972000	17070000	19749000
Q9P2B2	Q9P2B2	16	16	16	Prostaglandin F2 receptor negative regulator	PTGFRN		1	16	16	16	10	7	6	13	11	16	10	7	6	13	11	16	10	7	6	13	11	16	20.7	20.7	20.7	98.555	879	879	0	79.278	13.2	9.9	9.3	17.2	15.5	20.7	542290000	103150000	68227000	56157000	98825000	88390000
Q9P2E9	Q9P2E9	1	1	1	Ribosome-binding protein 1	RRBP1		1	1	1	1	0	0	0	1	0	0	0	0	0	1	0	0	0	0	0	1	0	0	1.3	1.3	1.3	152.47	1410	1410	0.00097943	1.9463	0	0	0	1.3	0	0	514130	0	0	0	514130	0
Q9P2J5	Q9P2J5	7	7	7	Leucine--tRNA ligase, cytoplasmic	LARS		1	7	7	7	4	4	4	3	2	4	4	4	4	3	2	4	4	4	4	3	2	4	7.7	7.7	7.7	134.46	1176	1176	0	13.671	4.1	4.1	4.1	4.3	2.3	4.1	51851000	12719000	11852000	7788600	5826800	5411800
Q9UBI6	Q9UBI6	5	5	5	Guanine nucleotide-binding protein G(I)/G(S)/G(O) subunit gamma-12	GNG12		1	5	5	5	3	3	2	5	4	3	3	3	2	5	4	3	3	3	2	5	4	3	70.8	70.8	70.8	8.0061	72	72	0	28.349	55.6	55.6	29.2	70.8	66.7	44.4	170060000	10716000	7860000	4302500	50460000	52595000
Q9UBM7	Q9UBM7	2	2	2	7-dehydrocholesterol reductase	DHCR7		1	2	2	2	2	0	1	0	0	1	2	0	1	0	0	1	2	0	1	0	0	1	4.2	4.2	4.2	54.489	475	475	0	6.2887	4.2	0	2.7	0	0	2.7	9101900	4435700	0	2850400	0	0
Q9UBT2	Q9UBT2	3	3	3	SUMO-activating enzyme subunit 2	UBA2		1	3	3	3	1	2	2	0	0	0	1	2	2	0	0	0	1	2	2	0	0	0	5.2	5.2	5.2	71.223	640	640	0	5.0858	2.3	3.8	3.8	0	0	0	8098400	2358200	3587300	2153000	0	0
Q9UBU7	Q9UBU7	1	1	1	Protein DBF4 homolog A	DBF4		1	1	1	1	0	0	0	1	0	0	0	0	0	1	0	0	0	0	0	1	0	0	1.5	1.5	1.5	76.857	674	674	1	-2	0	0	0	1.5	0	0	739840	0	0	0	739840	0
Q9UGM3	Q9UGM3	1	1	1	Deleted in malignant brain tumors 1 protein	DMBT1		1	1	1	1	0	0	0	1	1	1	0	0	0	1	1	1	0	0	0	1	1	1	5.2	5.2	5.2	260.73	2413	2413	0	4.624	0	0	0	5.2	5.2	5.2	24613000	0	0	0	8786600	7852000
Q9UGV2	Q9UGV2	1	1	1	Protein NDRG3	NDRG3		1	1	1	1	1	1	1	1	0	0	1	1	1	1	0	0	1	1	1	1	0	0	2.7	2.7	2.7	41.408	375	375	0.0092593	1.6018	2.7	2.7	2.7	2.7	0	0	8415000	2017800	2774700	2188500	1434000	0
Q9UHA4	Q9UHA4	2	2	2	Ragulator complex protein LAMTOR3	LAMTOR3		1	2	2	2	2	2	2	1	2	2	2	2	2	1	2	2	2	2	2	1	2	2	30.6	30.6	30.6	13.623	124	124	0	3.6669	30.6	30.6	30.6	8.1	30.6	30.6	24555000	5234800	5843100	4577100	1072500	3316400
Q9UHB6	Q9UHB6	2	2	2	LIM domain and actin-binding protein 1	LIMA1		1	2	2	2	1	0	0	0	0	1	1	0	0	0	0	1	1	0	0	0	0	1	2.6	2.6	2.6	85.225	759	759	0.0076046	1.7719	1.6	0	0	0	0	1.1	7406700	4307700	0	0	0	0
Q9UHD8	Q9UHD8	2	2	2	Septin-9	2018-09-09		1	2	2	2	0	0	0	2	2	1	0	0	0	2	2	1	0	0	0	2	2	1	3.4	3.4	3.4	65.401	586	586	0	2.7388	0	0	0	3.4	3.4	1.7	11504000	0	0	0	4808600	4391200
Q9UHR4	Q9UHR4	9	9	9	Brain-specific angiogenesis inhibitor 1-associated protein 2-like protein 1	BAIAP2L1		1	9	9	9	1	4	2	4	6	8	1	4	2	4	6	8	1	4	2	4	6	8	21.1	21.1	21.1	56.882	511	511	0	26.943	2	9.2	5.1	8.8	13.3	19	82112000	2359600	12486000	8692800	13115000	17151000
Q9UHV9	Q9UHV9	2	2	2	Prefoldin subunit 2	PFDN2		1	2	2	2	0	0	1	1	1	1	0	0	1	1	1	1	0	0	1	1	1	1	16.9	16.9	16.9	16.648	154	154	0	3.9482	0	0	9.1	7.8	7.8	7.8	8399300	0	0	1223900	2870900	1927900
Q9UHX1	Q9UHX1	1	1	1	Poly(U)-binding-splicing factor PUF60	PUF60		1	1	1	1	1	1	0	0	0	0	1	1	0	0	0	0	1	1	0	0	0	0	3.9	3.9	3.9	59.875	559	559	0	5.285	3.9	3.9	0	0	0	0	5064300	2487600	2576700	0	0	0
Q9UI30	Q9UI30	1	1	1	Multifunctional methyltransferase subunit TRM112-like protein	TRMT112		1	1	1	1	1	0	1	0	0	0	1	0	1	0	0	0	1	0	1	0	0	0	11.2	11.2	11.2	14.199	125	125	0.0019305	1.8925	11.2	0	11.2	0	0	0	3101400	1401200	0	1700200	0	0
Q9UIG0	Q9UIG0	1	1	1	Tyrosine-protein kinase BAZ1B	BAZ1B		1	1	1	1	1	0	1	0	0	0	1	0	1	0	0	0	1	0	1	0	0	0	1.1	1.1	1.1	170.9	1483	1483	0	2.9002	1.1	0	1.1	0	0	0	1488200	856790	0	631360	0	0
Q9UJ72	Q9UJ72	1	1	1	Annexin A10	ANXA10		1	1	1	1	1	1	0	1	1	0	1	1	0	1	1	0	1	1	0	1	1	0	4.9	4.9	4.9	37.277	324	324	0	4.9788	4.9	4.9	0	4.9	4.9	0	7965000	2885300	2299000	0	1511500	1269200
Q9UJU6	Q9UJU6	1	1	1	Drebrin-like protein	DBNL		1	1	1	1	0	1	0	0	0	1	0	1	0	0	0	1	0	1	0	0	0	1	4.2	4.2	4.2	48.207	430	430	0	2.9094	0	4.2	0	0	0	4.2	3199600	0	1959800	0	0	0
Q9UK41	Q9UK41	5	5	5	Vacuolar protein sorting-associated protein 28 homolog	VPS28		1	5	5	5	4	2	3	2	3	2	4	2	3	2	3	2	4	2	3	2	3	2	24	24	24	25.425	221	221	0	18.957	24	14.9	14.9	14.9	19.5	14.9	68181000	20920000	12496000	8852800	7198600	11471000
Q9UKD2	Q9UKD2	3	3	3	mRNA turnover protein 4 homolog	MRTO4		1	3	3	3	2	3	3	1	1	1	2	3	3	1	1	1	2	3	3	1	1	1	20.9	20.9	20.9	27.56	239	239	0	13.635	16.3	20.9	20.9	10	10	10	52413000	11526000	13464000	18168000	3605300	2931700
Q9UKK3	Q9UKK3	14	14	14	Poly [ADP-ribose] polymerase 4	PARP4		1	14	14	14	10	6	6	3	7	5	10	6	6	3	7	5	10	6	6	3	7	5	10.4	10.4	10.4	192.59	1724	1724	0	28.804	7.3	4.2	4.1	2.7	5.7	3.9	101390000	25133000	14078000	14590000	11803000	14581000
Q9UKM9	Q9UKM9	7	7	7	RNA-binding protein Raly	RALY		1	7	7	7	6	4	4	2	2	2	6	4	4	2	2	2	6	4	4	2	2	2	24.2	24.2	24.2	32.463	306	306	0	25.229	21.2	14.4	14.4	8.2	6.9	8.2	73333000	13644000	13491000	22248000	5434100	6548500
Q9UL46	Q9UL46	2	2	2	Proteasome activator complex subunit 2	PSME2		1	2	2	2	1	0	1	0	1	1	1	0	1	0	1	1	1	0	1	0	1	1	10.9	10.9	10.9	27.401	239	239	0	4.4711	5.9	0	5	0	5	5	10759000	2941100	0	3679400	0	2219400
Q9ULV4	Q9ULV4	4	4	4	Coronin-1C	CORO1C		1	4	4	4	2	2	0	0	0	0	2	2	0	0	0	0	2	2	0	0	0	0	12.2	12.2	12.2	53.248	474	474	0	5.2728	6.3	5.9	0	0	0	0	4662000	2723800	1938200	0	0	0
Q9UM54	Q9UM54	6	6	6	Unconventional myosin-VI	MYO6		1	6	6	6	4	4	4	0	1	1	4	4	4	0	1	1	4	4	4	0	1	1	6.3	6.3	6.3	149.69	1294	1294	0	20.746	4.4	4	3.9	0	1.2	1.2	38152000	9785300	11954000	11150000	0	2723500
Q9UMS4	Q9UMS4	1	1	1	Pre-mRNA-processing factor 19	PRPF19		1	1	1	1	1	0	1	0	0	0	1	0	1	0	0	0	1	0	1	0	0	0	5.2	5.2	5.2	55.18	504	504	0	10.165	5.2	0	5.2	0	0	0	12854000	7087300	0	5766300	0	0
Q9UN37;Q6PIW4	Q9UN37	2;1	1;0	1;0	Vacuolar protein sorting-associated protein 4A;Fidgetin-like protein 1	VPS4A;FIGNL1	;	2	2	1	1	2	2	2	2	2	2	1	1	1	1	1	1	1	1	1	1	1	1	7.3	4.6	4.6	48.897	437	437;674	0	4.126	7.3	7.3	7.3	7.3	7.3	7.3	26800000	3700800	7460400	5398300	3130500	4537000
Q9UNF0	Q9UNF0	7	7	7	Protein kinase C and casein kinase substrate in neurons protein 2	PACSIN2		1	7	7	7	4	3	4	5	4	3	4	3	4	5	4	3	4	3	4	5	4	3	15.8	15.8	15.8	55.738	486	486	0	14.745	8.8	6.4	9.7	10.3	8.4	6.6	72343000	12220000	15442000	12211000	14617000	10578000
Q9UNM6	Q9UNM6	5	5	5	26S proteasome non-ATPase regulatory subunit 13	PSMD13		1	5	5	5	2	3	4	4	4	3	2	3	4	4	4	3	2	3	4	4	4	3	13	13	13	42.945	376	376	0	8.4759	8	10.6	13	13	10.9	8.2	33864000	2652200	6377900	7278600	6325800	6521100
Q9UNS2	Q9UNS2	1	1	1	COP9 signalosome complex subunit 3	COPS3		1	1	1	1	0	0	0	0	1	1	0	0	0	0	1	1	0	0	0	0	1	1	2.8	2.8	2.8	47.873	423	423	0	3.0822	0	0	0	0	2.8	2.8	1074200	0	0	0	0	529720
Q9UQ35	Q9UQ35	2	2	2	Serine/arginine repetitive matrix protein 2	SRRM2		1	2	2	2	2	2	1	0	0	0	2	2	1	0	0	0	2	2	1	0	0	0	1.1	1.1	1.1	299.61	2752	2752	0.0010395	2.4662	1.1	1.1	0.4	0	0	0	15696000	8431200	5255500	2009300	0	0
Q9UQ80	Q9UQ80	3	3	3	Proliferation-associated protein 2G4	PA2G4		1	3	3	3	1	3	2	1	1	1	1	3	2	1	1	1	1	3	2	1	1	1	11.7	11.7	11.7	43.786	394	394	0	4.669	4.3	11.7	6.3	4.3	2	4.3	24835000	6739700	6685000	4501500	2808500	837260
Q9UQB8	Q9UQB8	8	8	8	Brain-specific angiogenesis inhibitor 1-associated protein 2	BAIAP2		1	8	8	8	1	2	2	7	6	6	1	2	2	7	6	6	1	2	2	7	6	6	18.3	18.3	18.3	60.867	552	552	0	15.057	2.4	5.4	5.4	15.9	14.9	14.7	47780000	1722600	3639500	3797200	13585000	12018000
Q9Y230	Q9Y230	14	14	14	RuvB-like 2	RUVBL2		1	14	14	14	9	10	9	9	12	11	9	10	9	9	12	11	9	10	9	9	12	11	33	33	33	51.156	463	463	0	51.013	25.3	27	25.1	23.1	28.3	27.9	227790000	45856000	45309000	41042000	28617000	30161000
Q9Y262	Q9Y262	1	1	1	Eukaryotic translation initiation factor 3 subunit L	EIF3L		1	1	1	1	1	1	1	1	1	1	1	1	1	1	1	1	1	1	1	1	1	1	2.8	2.8	2.8	66.726	564	564	0	10.959	2.8	2.8	2.8	2.8	2.8	2.8	16908000	4155500	2418800	2270900	3077700	2402200
Q9Y265	Q9Y265	11	11	11	RuvB-like 1	RUVBL1		1	11	11	11	10	7	5	5	9	5	10	7	5	5	9	5	10	7	5	5	9	5	34.6	34.6	34.6	50.227	456	456	0	49.889	31.8	22.1	18	18.6	29.8	18.4	245170000	69216000	54423000	36510000	31505000	27897000
Q9Y285	Q9Y285	1	1	1	Phenylalanine--tRNA ligase alpha subunit	FARSA		1	1	1	1	0	1	0	0	0	0	0	1	0	0	0	0	0	1	0	0	0	0	2.2	2.2	2.2	57.563	508	508	0.0084191	1.6814	0	2.2	0	0	0	0	636590	0	636590	0	0	0
Q9Y2Q3	Q9Y2Q3	1	1	1	Glutathione S-transferase kappa 1	GSTK1		1	1	1	1	1	1	1	0	1	0	1	1	1	0	1	0	1	1	1	0	1	0	7.1	7.1	7.1	25.497	226	226	0	2.7229	7.1	7.1	7.1	0	7.1	0	8908100	3415800	2018700	2193200	0	1280400
Q9Y2W1	Q9Y2W1	2	2	2	Thyroid hormone receptor-associated protein 3	THRAP3		1	2	2	2	2	2	1	0	0	0	2	2	1	0	0	0	2	2	1	0	0	0	3.1	3.1	3.1	108.66	955	955	0	3.0797	3.1	3.1	2.1	0	0	0	7609000	2233000	3118400	2257600	0	0
Q9Y2X3	Q9Y2X3	8	8	8	Nucleolar protein 58	NOP58		1	8	8	8	7	5	4	1	4	2	7	5	4	1	4	2	7	5	4	1	4	2	20.2	20.2	20.2	59.578	529	529	0	24.143	17.4	12.1	9.8	2.6	10.2	5.5	48570000	14747000	12574000	9977800	1815300	6274700
Q9Y315	Q9Y315	2	2	2	Deoxyribose-phosphate aldolase	DERA		1	2	2	2	1	1	1	0	0	0	1	1	1	0	0	0	1	1	1	0	0	0	12.3	12.3	12.3	35.23	318	318	0.0083565	1.6482	7.2	5	7.2	0	0	0	4739400	2255600	1029800	1454000	0	0
Q9Y365	Q9Y365	2	2	2	PCTP-like protein	STARD10		1	2	2	2	2	1	1	1	1	1	2	1	1	1	1	1	2	1	1	1	1	1	9.6	9.6	9.6	33.048	291	291	0	13.018	9.6	4.1	4.1	4.1	4.1	4.1	27501000	7972900	4433700	4689600	3182600	3759100
Q9Y383;Q9NQ29	Q9Y383	8;4	8;4	8;4	Putative RNA-binding protein Luc7-like 2;Putative RNA-binding protein Luc7-like 1	LUC7L2;LUC7L	;	2	8	8	8	7	5	6	4	3	2	7	5	6	4	3	2	7	5	6	4	3	2	24.7	24.7	24.7	46.513	392	392;371	0	30.905	20.9	18.1	18.9	12.5	12.2	7.9	148240000	56243000	26945000	28655000	15602000	12514000
Q9Y3L5	Q9Y3L5	5	2	2	Ras-related protein Rap-2c	RAP2C		1	5	2	2	5	3	2	3	4	4	2	1	1	1	1	1	2	1	1	1	1	1	25.7	13.7	13.7	20.745	183	183	0	3.3853	25.7	20.2	14.2	20.2	20.8	20.8	21751000	4313100	3790000	3183400	3323300	4019700
Q9Y3U8	Q9Y3U8	5	5	5	60S ribosomal protein L36	RPL36		1	5	5	5	4	3	3	2	3	3	4	3	3	2	3	3	4	3	3	2	3	3	37.1	37.1	37.1	12.254	105	105	0	11.704	37.1	30.5	28.6	18.1	28.6	28.6	288340000	86435000	47225000	48606000	33545000	38427000
Q9Y446	Q9Y446	2	2	2	Plakophilin-3	PKP3		1	2	2	2	1	0	0	0	1	0	1	0	0	0	1	0	1	0	0	0	1	0	3.9	3.9	3.9	87.081	797	797	0.0010627	2.6164	1.8	0	0	0	2.1	0	5509800	4161100	0	0	0	1348600
Q9Y490	Q9Y490	4	4	4	Talin-1	TLN1		1	4	4	4	2	0	0	1	2	3	2	0	0	1	2	3	2	0	0	1	2	3	3.1	3.1	3.1	269.76	2541	2541	0	4.4835	1.6	0	0	0.6	1.4	2.6	12974000	4063800	0	0	1183400	2727400
Q9Y4E6	Q9Y4E6	1	1	1	WD repeat-containing protein 7	WDR7		1	1	1	1	1	1	1	1	1	1	1	1	1	1	1	1	1	1	1	1	1	1	0.7	0.7	0.7	163.81	1490	1490	0.00098912	2.0015	0.7	0.7	0.7	0.7	0.7	0.7	283910000	57705000	64353000	49691000	34793000	34989000
Q9Y4F1	Q9Y4F1	1	1	1	FERM, RhoGEF and pleckstrin domain-containing protein 1	FARP1		1	1	1	1	1	1	0	0	0	1	1	1	0	0	0	1	1	1	0	0	0	1	1.2	1.2	1.2	118.63	1045	1045	0.001006	2.128	1.2	1.2	0	0	0	1.2	2640700	1185900	771570	0	0	0
Q9Y4L1	Q9Y4L1	12	12	12	Hypoxia up-regulated protein 1	HYOU1		1	12	12	12	6	7	5	4	7	6	6	7	5	4	7	6	6	7	5	4	7	6	16.2	16.2	16.2	111.33	999	999	0	24.356	7.8	9.9	7.1	5.7	8.4	8.3	98843000	13728000	17826000	13314000	15336000	21561000
Q9Y5K6	Q9Y5K6	6	6	6	CD2-associated protein	CD2AP		1	6	6	6	2	1	2	2	1	3	2	1	2	2	1	3	2	1	2	2	1	3	12.5	12.5	12.5	71.45	639	639	0	7.0776	4.1	1.4	3.4	5.3	2.8	6.4	23733000	7035100	1336700	2589900	5204400	1593800
Q9Y5Y6	Q9Y5Y6	11	11	11	Suppressor of tumorigenicity 14 protein	ST14		1	11	11	11	8	7	7	6	8	7	8	7	7	6	8	7	8	7	7	6	8	7	19.8	19.8	19.8	94.769	855	855	0	45.186	15.4	11.7	11.5	9.2	12.9	11.1	186900000	29307000	27467000	32140000	23937000	41146000
Q9Y624	Q9Y624	6	6	6	Junctional adhesion molecule A	F11R		1	6	6	6	3	2	2	2	4	5	3	2	2	2	4	5	3	2	2	2	4	5	27.1	27.1	27.1	32.583	299	299	0	14.136	18.1	10.4	6.4	9.4	19.4	23.1	95458000	16322000	19036000	7629800	9951600	19199000
Q9Y639	Q9Y639	1	1	1	Neuroplastin	NPTN		1	1	1	1	1	1	1	1	1	1	1	1	1	1	1	1	1	1	1	1	1	1	4.5	4.5	4.5	44.387	398	398	0	3.4231	4.5	4.5	4.5	4.5	4.5	4.5	54439000	14245000	7281200	6135600	14608000	5384200
Q9Y653	Q9Y653	5	5	5	G-protein coupled receptor 56;GPR56 N-terminal fragment;GPR56 C-terminal fragment	GPR56		1	5	5	5	5	5	4	4	4	3	5	5	4	4	4	3	5	5	4	4	4	3	11.4	11.4	11.4	77.737	693	693	0	17.391	11.4	11.4	10	9.2	9.2	7.8	79654000	17057000	13237000	8176200	14857000	12964000
Q9Y678;Q9UBF2	Q9Y678	5;2	5;2	5;2	Coatomer subunit gamma-1	COPG1		2	5	5	5	2	2	2	2	0	0	2	2	2	2	0	0	2	2	2	2	0	0	6.8	6.8	6.8	97.717	874	874;871	0	7.1285	3.1	3.1	3	3.4	0	0	17102000	5113600	5143300	4385200	2459500	0
Q9Y696	Q9Y696	3	3	3	Chloride intracellular channel protein 4	CLIC4		1	3	3	3	2	3	2	1	3	1	2	3	2	1	3	1	2	3	2	1	3	1	19.8	19.8	19.8	28.772	253	253	0	5.237	13.4	19.8	13.4	4.7	19.8	4.7	46904000	10727000	11169000	9408900	4445900	6832200
Q9Y6E0;O00506	Q9Y6E0	2;1	2;1	1;0	Serine/threonine-protein kinase 24;Serine/threonine-protein kinase 24 36 kDa subunit;Serine/threonine-protein kinase 24 12 kDa subunit;Serine/threonine-protein kinase 25	STK24;STK25	;	2	2	2	1	1	0	2	1	1	2	1	0	2	1	1	2	1	0	1	0	0	1	7.2	7.2	3.4	49.307	443	443;426	0	6.0041	3.4	0	7.2	3.8	3.8	7.2	13409000	2333200	0	3379900	2021600	2128300
Q9Y6E2	Q9Y6E2	3	3	3	Basic leucine zipper and W2 domain-containing protein 2	BZW2		1	3	3	3	0	2	3	0	0	0	0	2	3	0	0	0	0	2	3	0	0	0	8.8	8.8	8.8	48.162	419	419	0	7.9672	0	4.3	8.8	0	0	0	16389000	0	8114800	8274400	0	0
Q9Y6R7	Q9Y6R7	45	45	45	IgGFc-binding protein	FCGBP		1	45	45	45	31	29	32	16	21	20	31	29	32	16	21	20	31	29	32	16	21	20	21.8	21.8	21.8	572.01	5405	5405	0	195.7	17.7	14.3	15.6	8.5	11.2	9.5	862490000	254780000	179390000	181960000	77888000	88428000
[truncated: 21 more columns]
